# Supplementary material for: Randomised controlled pilot and feasibility study of multimodal agility-based exercise training (MAT) versus strength and endurance training (SET) to improve multiple sclerosis-related fatigue and fatigability during inpatient rehabilitation (ReFEx): study protocol
Source: PubMed Central journal article supplement — BMJ Open. 2022 Sep 6;12(9):e062160. doi: 10.1136/bmjopen-2022-062160 (PMC9454066; doi:10.1136/bmjopen-2022-062160), 2022-09-06
Supplement: bmjopen-2022-062160.draft_revisions.pdf [file bmjopen-2022-062160.draft_revisions.pdf]

# BMJ Open

BMJ Open is committed to open peer review. As part of this commitment we make the peer review history of every article we publish publicly available.

When an article is published we post the peer reviewers' comments and the authors' responses online. We also post the versions of the paper that were used during peer review. These are the versions that the peer review comments apply to.

The versions of the paper that follow are the versions that were submitted during the peer review process. They are not the versions of record or the final published versions. They should not be cited or distributed as the published version of this manuscript.

BMJ Open is an open access journal and the full, final, typeset and author-corrected version of record of the manuscript is available on our site with no access controls, subscription charges or pay-per-view fees (<http://bmjopen.bmj.com>).

If you have any questions on BMJ Open's open peer review process please email [info.bmjopen@bmj.com](mailto:info.bmjopen@bmj.com)

# BMJ Open

**A randomized controlled pilot and feasibility study of multimodal agility-based exercise training versus strength and endurance training to improve Multiple Sclerosis-related fatigue and fatigability during inpatient rehabilitation [ReFEx] – study protocol.**

|                               |                                                                                                                                                                                                                                                                                                                                                                                                                                                                                                                                                                                                                                                                                                                                                                                                                                           |
|-------------------------------|-------------------------------------------------------------------------------------------------------------------------------------------------------------------------------------------------------------------------------------------------------------------------------------------------------------------------------------------------------------------------------------------------------------------------------------------------------------------------------------------------------------------------------------------------------------------------------------------------------------------------------------------------------------------------------------------------------------------------------------------------------------------------------------------------------------------------------------------|
| Journal:                      | <i>BMJ Open</i>                                                                                                                                                                                                                                                                                                                                                                                                                                                                                                                                                                                                                                                                                                                                                                                                                           |
| Manuscript ID                 | bmjopen-2022-062160                                                                                                                                                                                                                                                                                                                                                                                                                                                                                                                                                                                                                                                                                                                                                                                                                       |
| Article Type:                 | Protocol                                                                                                                                                                                                                                                                                                                                                                                                                                                                                                                                                                                                                                                                                                                                                                                                                                  |
| Date Submitted by the Author: | 23-Feb-2022                                                                                                                                                                                                                                                                                                                                                                                                                                                                                                                                                                                                                                                                                                                                                                                                                               |
| Complete List of Authors:     | <p>Wolf, Florian; Neurological Rehabilitation Centre Godeshoehe; German Sport University Cologne, Department of Molecular and Cellular Sports Medicine</p> <p>Nielsen, Jörn; Neurological Rehabilitation Centre Godeshoehe; University of Cologne, Department of Medical Psychology, Neuropsychology and Gender Studies</p> <p>Saliger, Jochen; Neurological Rehabilitation Centre Godeshoehe</p> <p>Hennecken, Eva; Neurological Rehabilitation Centre Godeshoehe</p> <p>Eschweiler, Mareike; Neurological Rehabilitation Centre Godeshoehe</p> <p>Folkerts, Ann-Kristin; University of Cologne, Department of Medical Psychology, Neuropsychology and Gender Studies</p> <p>Karbe, Hans; Neurological Rehabilitation Centre Godeshoehe</p> <p>Zimmer, Philipp; Technical University Dortmund, Department for Performance and Health</p> |
| Keywords:                     | Multiple sclerosis < NEUROLOGY, SPORTS MEDICINE, REHABILITATION MEDICINE                                                                                                                                                                                                                                                                                                                                                                                                                                                                                                                                                                                                                                                                                                                                                                  |
|                               |                                                                                                                                                                                                                                                                                                                                                                                                                                                                                                                                                                                                                                                                                                                                                                                                                                           |

SCHOLARONE™  
Manuscripts

1  
2  
3 1 **A randomized controlled pilot and feasibility study of multimodal agility-based exercise**  
4  
5 2 **training versus strength and endurance training to improve Multiple Sclerosis-related**  
6  
7 3 **fatigue and fatigability during inpatient rehabilitation [ReFEx] – study protocol.**  
8  
9

10 4  
11  
12 5 **Akronym: ReFEx (Rehabilitation, Fatigue, and Exercise)**  
13  
14 6

15  
16  
17 7 **Authors:** Florian Wolf<sup>1,2,\*</sup>, Jörn Nielsen<sup>1,3,\*</sup>, Jochen Saliger<sup>1</sup>, Eva Hennecken<sup>1</sup>, Mareike  
18  
19 8 Eschweiler<sup>1</sup>, Ann-Kristin Folkerts<sup>3</sup>, Hans Karbe<sup>1</sup>, Philipp Zimmer<sup>4</sup>  
20  
21 9

- 22  
23  
24 10 1. Neurological Rehabilitation Centre Godeshoehe, Waldstraße 2-10, 53177 Bonn, Germany  
25  
26 11 2. Department of Molecular and Cellular Sports Medicine, Institute of Cardiovascular  
27  
28 12 Research and Sports Medicine, German Sport University Cologne, Am Sportpark  
29  
30 13 Müngersdorf 6, 50933 Cologne, Germany  
31  
32  
33 14 3. Department of Medical Psychology, Neuropsychology and Gender Studies, Centre for  
34  
35 15 Neuropsychological Diagnostics and Intervention (CeNDI), Faculty of Medicine and  
36  
37 16 University Hospital Cologne, University of Cologne, Kerpener Str. 62, 50937 Cologne,  
38  
39 17 Germany  
40  
41  
42 18 4. Department for Performance and Health, Institute for Sport and Sport Science, Technical  
43  
44 19 University Dortmund, Otto-Hahn-Straße 3, 44227 Dortmund, Germany  
45

46  
47 20 \*These authors share first authorship.  
48  
49 21

50  
51 22 **Corresponding author:** Florian Wolf, f.wolf@godeshoehe.de  
52  
53 23

54  
55  
56 24 **Word count:** 3972  
57  
58  
59  
60

1  
2  
3 25 **Trial status:** The first participant has been enrolled on 18 November 2021. At the time of  
4  
5 26 submission, 9/24 participants have been recruited, 3/24 participants have finished the  
6  
7 27 intervention period and completed the primary measurement time point one week after the end  
8  
9 28 of the intervention period.  
10  
11  
12  
13  
14

## 15 30 **ABSTRACT**

16  
17 31 **Introduction:** Subjective fatigue and objectively assessed fatigability are common symptoms  
18  
19 32 in persons with Multiple Sclerosis (pwMS). Recent work has suggested a positive effect of  
20  
21 33 balance and motor control training (BMCT) in reducing fatigue. It is unclear whether this effect  
22  
23 34 can also be attained during inpatient rehabilitation. This study will evaluate the feasibility of a  
24  
25 35 randomized controlled trial comparing BMCT with added agility components (i.e., multimodal  
26  
27 36 agility-based exercise training [MAT]) with strength and endurance training (SET) for the  
28  
29 37 improvement of MS-related fatigue and fatigability in a German neurologic rehabilitation  
30  
31 38 center. With the conductance of the ReFEx (Rehabilitation, Fatigue, and Exercise) project we  
32  
33 39 plan to (I) translate existing evidence on BMCT in pwMS to the setting of inpatient  
34  
35 40 rehabilitation, (II) introduce the framework of MAT, and (III) apply a clear focus on the  
36  
37 41 treatment of fatigue as one of the most challenging symptoms in MS.  
38  
39  
40  
41  
42

42 42 **Methods and analysis:** A total of 24 pwMS (Expanded Disability Status Scale  $\leq 5.0$ , Fatigue  
43  
44 43 Scale for Motor and Cognitive Functions  $\geq 53$ ) will be randomly assigned to either SET or land-  
45  
46 44 based and water-based MAT for 4 to 6 weeks during inpatient rehabilitation. Assessments of  
47  
48 45 subjective fatigue, motor and cognitive fatigability, cognitive and cardiorespiratory  
49  
50 46 performance, and balance confidence will be performed at admission and discharge. Subjective  
51  
52 47 fatigue will also be assessed 1, 4, and 12 weeks after discharge. Feasibility outcomes will  
53  
54 48 include patients' acceptance of study procedures and interventions, recruitment rate, retention  
55  
56 49 rate, time needed to complete baseline assessments, intervention adherence, and fidelity. A  
57  
58  
59  
60

total of 12 pwMS (6 per group) will be interviewed to gain insights into participants' experiences during study participation.

**Ethics and dissemination:** Ethical approval has been obtained from the Ethics Committee of the University of Bonn (reference number: 543/20). Dissemination of findings is planned via peer-reviewed journals, conferences, and media releases.

**Trial registration:** German Clinical Trials Register: DRKS00023943, date of registration: 23 September 2021

### Keywords

multiple sclerosis, sports medicine, rehabilitation medicine

### Strengths and limitations

- Comprehensive assessment of subjective fatigue, as well as objective cognitive and motor fatigability
- First application of agility-based exercise training to pwMS
- Mixed-methods approach to acquire patient perspective and acceptance
- Clinical inpatient setting will challenge standardization of study procedures

## INTRODUCTION

Fatigue, described as 'a subjective sensation of lack of energy and exhaustion' (p. E79)<sup>1</sup>, was reported as the most common symptom (58%) among 35,000 patients from the German multiple sclerosis (MS) register<sup>2</sup>. It is also reported as one of the most disabling symptoms<sup>3</sup> with high socioeconomic relevance as 25% of persons with MS (pwMS) have impaired working capacity because of 'invisible symptoms' such as fatigue and impaired cognition<sup>4,5</sup>.

1  
2  
3 75 Data from the MS register also show that only 35% of fatigued pwMS receive any kind of  
4  
5 76 treatment and among them only 15% receive pharmacological treatment to specifically handle  
6  
7 77 fatigue symptoms<sup>2</sup>. No clear pathomechanisms for fatigue have been defined yet leading to the  
8  
9 78 consequence of still limited pharmacotherapy options for the treatment of fatigue<sup>6</sup>.  
10  
11  
12 79 According to the established taxonomy by Kluger and colleagues<sup>7</sup> two concepts must be  
13  
14 80 separated when considering fatigue: (I) the subjective experience of fatigue and (II) objective  
15  
16 81 performance fatigability during motor or cognitive tasks. Whether improvements in fatigability  
17  
18 82 also transfer to subjective fatigue is still unclear. Interestingly, the association between the two  
19  
20 83 constructs seems to be relatively weak<sup>8 9</sup>.  
21  
22  
23 84 Next to distinguishing between ‘fatigue’ and ‘fatigability’, a further dichotomy exists with  
24  
25 85 ‘primary fatigue’ resulting from pathophysiological processes of the disease itself (e.g., central  
26  
27 86 nervous system, immunologic or endocrine changes) and ‘secondary fatigue’ resulting from  
28  
29 87 mechanisms not directly related to the disease (e.g., sleep, depression, medication)<sup>10</sup>.  
30  
31  
32 88 To reduce subjective fatigue, exercise interventions have been studied as a non-  
33  
34 89 pharmacological treatment option. However, several methodological issues exist. As fatigue is  
35  
36 90 frequently assessed as a secondary outcome variable, subjects are often not pre-screened for  
37  
38 91 fatigue symptoms at baseline and the intervention is not primarily designed to reduce fatigue<sup>11</sup>  
39  
40 92 <sup>12</sup>. Consequently, to date, there are few studies investigating the specific pathophysiological  
41  
42 93 pathways of primary or secondary fatigue that are altered by exercise<sup>10</sup>.  
43  
44  
45 94 In a recent meta-analysis Moss-Morris and colleagues<sup>11</sup> performed a detailed review of  
46  
47 95 exercise intervention studies, that specifically aimed at fatigue reduction. Here, the authors  
48  
49 96 reported variance in the effects of different types of exercise. For example, endurance exercise  
50  
51 97 has been frequently investigated, as it can be easily standardized, but was reported to have only  
52  
53 98 small effects on fatigue outcomes measured with self-report questionnaires<sup>13</sup>. If combined with  
54  
55 99 other modalities such as resistance exercise, effects might be greater (e.g., strength and  
56  
57  
58  
59  
60

1  
2  
3 100 endurance training [SET]). Lastly, exercise types primarily consisting of stimuli targeting  
4  
5 101 motor control (e.g., balance and motor control training [BMCT]) were described as  
6  
7  
8 102 promising<sup>14-16</sup>.

9  
10 103 In the special setting of inpatient rehabilitation, the number of exercise studies for subjective  
11  
12 104 fatigue reduction is very limited. In their review, Moss-Morris and colleagues<sup>11</sup> identified only  
13  
14 105 one study conducted in an inpatient rehabilitation setting. However, this trial was restricted  
15  
16 106 from the meta-analysis because of methodological limitations, indicating the need for future  
17  
18 107 systematic research on fatigue-specific therapy. This is also evident in the first German practice  
19  
20 108 guideline for exercise therapy in pwMS, which highlights mobility rehabilitation but does not  
21  
22 109 consider symptoms of fatigue or fatigability<sup>17</sup>.

23  
24  
25  
26 110 Therefore, the ReFEx (Rehabilitation, Fatigue, and Exercise) project aims to transfer BMCT,  
27  
28 111 which is promising for subjective fatigue reduction, to inpatient rehabilitation and compare it  
29  
30 112 with SET, which is considered the control group or 'usual care'. We also adapted the BMCT  
31  
32 113 to be based on the agility framework described by Donath and colleagues<sup>18</sup>. Thus, the treatment  
33  
34 114 manual will also include functional leg strength and agility-based exercises (i.e., multimodal  
35  
36 115 agility-based exercise training [MAT]). This is the first study applying the agility framework  
37  
38 116 to pwMS. In doing so, we not only expect to target subjective fatigue, but also other frequent  
39  
40 117 MS-specific symptoms including performance fatigability as well as disturbed gait and  
41  
42 118 balance. Applying the agility framework to BMCT could further provide an opportunity for  
43  
44 119 combined motor and cognitive rehabilitation<sup>19</sup>, that is fun, enjoyable, and social<sup>18</sup>.

45  
46  
47  
48  
49 120 Referring to the pathophysiological framework by Langeskov-Christensen and colleagues<sup>10</sup> we  
50  
51 121 hypothesize that the SET will improve secondary fatigue via improved aerobic capacity and  
52  
53 122 motor function, while the MAT intervention will improve secondary fatigue via improved  
54  
55 123 motor function and reduced cognitive effort in daily life (as hypothesized by Moss-Morris and  
56  
57 124 colleagues<sup>11</sup> and others<sup>14-16 20</sup>). Based on the existing evidence, we expect greater benefits on  
58  
59  
60

1  
2  
3 125 secondary fatigue parameters from MAT than for SET. Regarding performance fatigability, we  
4  
5 126 hypothesize, that MAT will be superior to SET in improving motor and cognitive fatigability.  
6  
7  
8 127 In a first step, the pilot and feasibility study (PAFS) described in this protocol will be used to  
9  
10 128 determine whether the adapted MAT and SET are feasible in the inpatient rehabilitation setting  
11  
12 129 with a special emphasis on patients' acceptance. This will include both, a quantitative, and  
13  
14 130 qualitative evaluation.  
15  
16

17 131

## 19 132 **METHODS AND ANALYSIS**

### 21 133 **Study design**

23  
24 134 The PAFS will be conducted at the Neurological Rehabilitation Center (NRC) 'Godeshoehe'  
25  
26 135 (Bonn; certified MS Rehabilitation Center). It will have a two-armed, parallel-group,  
27  
28 136 randomized-controlled design with twelve weeks follow-up, following a mixed-methods  
29  
30 137 approach. Measurement time points are provided in the Standard Protocol Items:  
31  
32 138 Recommendations for Interventional Trials (SPIRIT) figure (Table 1).  
33  
34

35 139

### 37 140 **Patient and public involvement**

39  
40 141 In our therapeutic work of several years in a specialized rehabilitation clinic for MS, the  
41  
42 142 majority of pwMS report that fatigue is difficult to cope with and limits quality of life. These  
43  
44 143 patient reports were the impetus for the conception of this study, especially as there are few  
45  
46 144 evaluated therapy approaches. In the conception of this PAFS, it was important for us to  
47  
48 145 appreciate the patient perspective and to include the affected persons as 'experts of their  
49  
50 146 disease'. In particular, this takes the form of qualitative interviews, which we base on a  
51  
52 147 constructivist paradigm that allows for the co-creation of knowledge by the participants and  
53  
54 148 the researcher.  
55  
56

57 149



150 **Table 1** SPIRIT figure depicting the schedule of enrollment, interventions and assessments for  
 151 the pilot and feasibility study.

|                                           | STUDY PERIOD |            |                 |       |       |       |       |
|-------------------------------------------|--------------|------------|-----------------|-------|-------|-------|-------|
|                                           | Enrolment    | Allocation | Post-Allocation |       |       |       |       |
| TIMEPOINT                                 | $-T_0$       | 0          | $T_0$           | $T_1$ | $T_2$ | $T_3$ | $T_4$ |
| <b>ENROLMENT:</b>                         |              |            |                 |       |       |       |       |
| Eligibility screen                        | X            |            |                 |       |       |       |       |
| Informed consent                          | X            |            |                 |       |       |       |       |
| Stratified randomization                  |              | X          |                 |       |       |       |       |
| <b>INTERVENTIONS</b>                      |              |            |                 |       |       |       |       |
| <i>MAT</i>                                |              |            | ↔               |       |       |       |       |
| <i>SET</i>                                |              |            | ↔               |       |       |       |       |
| <b>ASSESSMENTS:</b>                       |              |            |                 |       |       |       |       |
| <i>Fatigue (WEIMuS)</i>                   | X            |            |                 | X     | X     | X     | X     |
| <i>Fatigue (FSMC)</i>                     | X            |            |                 | X     | X     | X     | X     |
| <i>Cognitive fatigability (TAP-Alert)</i> |              |            | X               | X     |       |       |       |
| <i>Motor fatigability (6MWT)</i>          | X            |            |                 | X     |       |       |       |
| <i>Cognitive performance (CVLT, SDMT)</i> |              |            | X               | X     |       |       |       |
| <i>Cardiorespiratory fitness (GXT)</i>    |              |            | X               | X     |       |       |       |
| <i>Motor function (T25FW, SSST, FGA)</i>  | X            |            |                 | X     |       |       |       |
| <i>Balance confidence (ABC)</i>           | X            |            |                 | X     |       |       |       |
| <i>Depression (CES-D)</i>                 |              |            | X               | X     |       |       |       |
| <i>Feasibility outcomes</i>               | ↔            |            |                 |       |       |       |       |
| <i>Interview 1 (Feasibility)</i>          |              |            |                 | X     |       |       |       |
| <i>Interview 2 (Fatigue responder)</i>    |              |            |                 |       | X     |       |       |

1  
2  
3 152  
4 153  $-T_0$  = admission;  $0$  = after written informed consent;  $T_0$  = post-randomization;  $T_1$  = prior to  
5  
6 154 discharge;  $T_2$  = 1 - 2 weeks after discharge;  $T_3$  = 4 weeks after discharge;  $T_4$  = 12 weeks after  
7  
8 155 discharge; *MAT* = Multimodal Agility-based exercise Training; *SET* = Strength and Endurance  
9  
10 156 Training; *WEIMuS* = Würzburg Fatigue Inventory for Multiple Sclerosis; *FSMC* = Fatigue  
11  
12 157 Scale for Motor and Cognitive Functions; *TAP-Alert* = Test Battery of Attention Performance  
13  
14 158 – Alertness; *6MWT* = 6-Minute Walk Test; *CVLT* = California Verbal Learning Test; *SDMT* =  
15  
16 159 Symbol Digit Modalities Test; *GXT* = Graded Exercise Test; *T25FW* = Timed 25-foot Walk  
17  
18 160 Test; *SSST* = Six Spot Step Test; *FGA* = Functional Gait Assessment; *ABC* = Activities-  
19  
20 161 Specific Balance Confidence Scale; *CES-D* Center for Epidemiological Studies Depression  
21  
22 162 Scale (German version)  
23  
24  
25  
26  
27  
28  
29

163

## 164 **Screening and recruitment**

31  
32 165 Individuals admitted to the NRC will be screened for pwMS. All pwMS will then be scheduled  
33  
34 166 for neuropsychological examination the day after admission, according to usual practice. Here,  
35  
36 167 patients will be asked to complete the Fatigue Scale for Motor and Cognitive Functions  
37  
38 168 (*FSMC*). If a patient is classified as, at least, ‘moderately fatigued’ and the patient fulfils all  
39  
40 169 other eligibility criteria (Table 2), he or she will be informed about the study by his or her  
41  
42 170 neuropsychologist (JN, JS, EH), verbally, and in written form.  
43  
44  
45

171

## 172 **Randomization**

46  
47  
48  
49 173 If patients provide the written informed consent to one of the study staff members within a  
50  
51 174 maximum of three days, they will be randomly allocated (1:1) to the intervention or control  
52  
53 175 group according to the minimization procedure<sup>21</sup> and stratified by Expanded Disability Status  
54  
55 176 Scale (*EDSS*,  $\leq 3$  or  $\geq 3.5$ ), Würzburg Fatigue Inventory for Multiple Sclerosis (*WEIMuS*,  $< 38$   
56  
57 177 or  $\geq 38$ ), age ( $< 45$  or  $\geq 45$ ), and MS disease course (relapsing-remitting or secondary-

1  
2  
3 178 progressive). Randomization will be provided by an independent researcher from the German  
4  
5 179 Sport University Cologne using RITA ('Randomization-In-Treatment-Arms', Evident,  
6  
7  
8 180 Germany).

9  
10 181

## 12 182 **Sample size and duration**

14 183 Data from the PAFS is planned to be pooled with data from the full trial in case no major  
15  
16  
17 184 changes of study protocol will be necessary (see progression requirements). Acceptability of  
18  
19 185 pooling will be evaluated according to components listed in the 'Acceptance checklist for  
20  
21 186 clinical effectiveness pilot trials'<sup>22</sup>. As the primary aim of this trial is to evaluate the feasibility,  
22  
23  
24 187 no sample size calculation based on statistical assumptions will be performed. However, we  
25  
26 188 consider a minimum of twelve recruited patients per study arm to be a reasonable sample size  
27  
28 189 for this setting<sup>23</sup>.

30 190 The NRC treats about 100 – 120 pwMS per year. According to previous data collections for  
31  
32  
33 191 the German MS register no more than 25% of patients will have to be excluded, based on EDSS  
34  
35 192 and FSMC screening (see eligibility criteria). We further predict no more than 10% of eligible  
36  
37  
38 193 patients to be unwilling to participate, based on previously conducted studies. Comparable  
39  
40 194 studies have had low drop-out rates (5%<sup>24</sup>) but did not choose a primary endpoint after patients  
41  
42 195 returned home. Consequently, we plan with up to 20% drop-out between T<sub>0</sub> and T<sub>2</sub>. This will  
43  
44 196 result in a feasibility period of about six to eight months. Drop-out and retention-rates will be  
45  
46  
47 197 used to inform the sample size calculation for the full randomized controlled trial (RCT).

48  
49 198

## 51 199 **Participants**

52 200 PwMS will be eligible to participate in this trial according to the inclusion and exclusion criteria  
53  
54  
55 201 stated in Table 2.

56  
57  
58 202  
59  
60

203 **Table 2** Eligibility criteria.

| Inclusion                               | Exclusion                                                                                                         |
|-----------------------------------------|-------------------------------------------------------------------------------------------------------------------|
| <b>1. MS disease course</b><br>RR or SP | <b>1. Unable to attend water therapy</b>                                                                          |
| <b>2. Age</b><br>18 - 67                | <b>2. Comorbidities</b><br>That prevent attending study therapies,<br>chronic neurologic conditions other than MS |
| <b>3. EDSS</b><br>≤5.0                  | <b>3. German language skills</b><br>That interfere with understanding of<br>testing and instructions              |
| <b>4. FSMC total score</b><br>≥53       | <b>4. Current fatigue medication</b><br>Amantadin, Modafinil started <3 months                                    |
| <b>5. Written informed consent</b>      |                                                                                                                   |

204 *RR* = Relapsing-remitting; *SP* = Secondary-progressive; *EDSS* = Expanded Disability Status  
 205 Scale; *FSMC* = Fatigue Scale for Motor and Cognitive Functions.

### 207 Interventions

208 The intervention period includes the time from admission to discharge, which usually  
 209 comprises four to six weeks for this group of patients. Multidisciplinary inpatient rehabilitation  
 210 can consist of various diagnostic and therapeutic components such as exercise training,  
 211 occupational and physical therapy, health education, neuropsychological assessment, or  
 212 assessment of working capacity. Thus, interactions between treatments as well as flexibility in  
 213 the treatment schedule are common<sup>25</sup>. For this reason, we designed the schedules of the two  
 214 study groups to ensure the following:

- 215 (I) Distinct differences in the amount of therapy targeting cognitive and sensory integration.
- 216 (II) Standardization of treatment as strictly as possible within this specific clinical setting.
- 217 (III) Equivalent amount of total therapy time.

218 See Table 3 for an overview of intervention components. Reporting of the interventions will  
 219 follow the modified Consensus on Exercise Reporting Template (CERT) for Therapeutic  
 220 Exercise Interventions<sup>26</sup>.

221

222 **Table 3** Frequency, time, and type of intervention components.

| MAT (intervention)           | SET (control)                   |
|------------------------------|---------------------------------|
| 5x/w, 30min, 'MS-group'      |                                 |
| 5x/w, 30min, land-based MAT  | 5x/w, 22min, endurance training |
| 3x/w, 30min, water-based MAT | 3x/w, 30min, strength training  |

223

224 Standard treatment for both groups

225 Both groups will attend the 'MS-group', a specific group for all pwMS, focusing on body  
 226 awareness and relaxation techniques. It consists of max. eight pwMS, lasts 30min and is led by  
 227 an exercise therapist. Both groups will also attend MS-specific lectures once a week. All other  
 228 available therapies, which are not part of standard treatment, will be included only after  
 229 individual consideration to maximize standardization.

230

231 Strength and Endurance Training (SET)

232 The combined strength and endurance training program will be considered the control  
 233 condition. All endurance training sessions will be supervised by exercise therapists from the  
 234 NRC. Strength training sessions will be supervised by exercise science students or therapists  
 235 in one-on-one sessions. Students and therapists conducting the strength training will be  
 236 instructed by FW and will follow a training protocol (see Supplemental File [Strength  
 237 Protocol]).

1  
2  
3 238 Endurance training will be performed according to the standard protocol in this clinic, with  
4  
5 239 22min per session (3min of gradual increase, 17min steady and 2min cool-down) on a cycle  
6  
7  
8 240 ergometer (ergoselect 5, ergoline GmbH, Bitz, Germany) with continuous monitoring of power  
9  
10 241 output and heart rate (ers.2 software, ergoline GmbH, Bitz, Germany). Endurance training will  
11  
12 242 be performed in groups of max. eight patients. In the first session, participants will start their  
13  
14 243 training at an intensity that was rated “light” to “somewhat hard” by themselves during the  
15  
16 244 baseline graded exercise test (GXT) (equivalent to 11-13 on the 6-20 Rated Perceived Exertion  
17  
18 245 [RPE] – scale). In the following sessions, therapists will regulate the power output so that  
19  
20 246 participants stay between 11 and 13 on the RPE-scale. If a pwMS is unable to complete the  
21  
22 247 total duration, the session duration can be initially reduced and then progressed in the following  
23  
24 248 sessions. The range of 11 to 13 was chosen based on recent evidence-based recommendations  
25  
26 249 for pwMS with similar EDSS<sup>27</sup>.

30 250 Resistance training will be adapted from Callesen and colleagues<sup>14</sup> to fit the inpatient setting.  
31  
32 251 Each session will start with a 5min warm-up on an elliptical trainer, treadmill, or recumbent  
33  
34 252 stepper, followed by three to four exercises targeting hip, knee, and ankle flexion and  
35  
36 253 extension, as well as hip abduction. Exercises will be progressed as follows:

- 40 254 • Session 1-5: 3x10 repetitions with the 15 repetitions maximum (RPM)
- 42 255 • Session 6-T<sub>1</sub> (session 10-16): 3x12 repetitions with 12RPM

44 256 In detail, for every new exercise, therapists will initially determine the respective weight the  
45  
46 257 participant is able to move no more than the intended RPM. Therapists will be given the  
47  
48 258 necessary room for individualization but will be instructed to follow pre-specified exercises  
49  
50 259 (see Supplemental File [Strength Protocol]).

53 260

56 261 Multimodal agility-based exercise training (MAT)

1  
2  
3 262 For the treatment manual see Supplemental File [MAT-Manual]. All sessions will be guided  
4  
5 263 by max. three different exercise therapists (including FW) from the NRC, experienced with  
6  
7 264 providing balance exercises on land and in the water in group settings. However, as MAT also  
8  
9 265 comprises other/new elements, exercise therapists will be specifically trained by FW and  
10  
11 266 instructed to follow the treatment manual.

12  
13  
14 267 Both parts (i.e., water and land) will be installed within existing group therapies. Each group  
15  
16 268 will consist of max. eight participants. Empty spots will be filled with other patients from the  
17  
18 269 NRC. The intervention program will consist of three main components: (1) standing balance  
19  
20 270 exercises, (2) dynamic balance exercises including functional leg strength, (3) agility-like  
21  
22 271 exercises including change of direction and change of velocity<sup>28</sup>. Each main component will  
23  
24 272 be represented in several modules. Each module is constructed as a basic set-up, that can be  
25  
26 273 progressed in terms of difficulty. Additionally, modifications on a cognitive (e.g., memory,  
27  
28 274 attention, inhibition) and sensory (i.e., visual, somatosensory, vestibular) level are described.  
29  
30 275 As stated by Callesen and colleagues<sup>14</sup> there is no consensus yet on how to define intensity or  
31  
32 276 progression in balance and motor control exercises. Thus, for this intervention, therapists will  
33  
34 277 be instructed to aim for a level of difficulty and complexity that keeps exercises manageable  
35  
36 278 and safe for participants, but also provokes motor or cognitive errors. This is in line with  
37  
38 279 recommendations for neurorehabilitation from basic science<sup>29</sup>.

39  
40 280 For load management in the land-based therapy, there will be three sessions with higher  
41  
42 281 physical strain (i.e., agility-like components and functional leg strength) interspersed with two  
43  
44 282 sessions with lower physical strain (i.e., standing balance and exercises with a cognitive focus).  
45  
46 283 Due to water immersion, physical strain in the water-based therapy should be lower in general.  
47  
48 284 Participants will be instructed to take individual breaks whenever they need to. They will also  
49  
50 285 be advised to monitor their fatigue during their stay and skip a session when they need more  
51  
52 286 time to regenerate.  
53  
54  
55  
56  
57  
58  
59  
60

1  
2  
3 287  
45 288 **Blinding**6  
7  
8 289 The neuropsychological staff conducting the cognitive tests will be blinded to the study groups.  
910 290 However, for organizational reasons and specifics of the study setting, blinding of participants,  
1112 291 therapists conducting the interventions as well as personnel conducting the motor and  
1314 292 cardiorespiratory fitness (CRF) tests and analyzing the questionnaires will not be possible.  
15  
16

17 293

18  
19 294 **Outcomes**20  
21 295 As depicted in Table 1, assessments will be carried out at admission (i.e., pre-intervention, T<sub>0</sub>)  
2223 296 and discharge (i.e., post-intervention, T<sub>1</sub>), as well as after participants have returned home (i.e.,  
2425 297 follow-up, T<sub>2</sub>-T<sub>4</sub>).  
26  
27

28 298

29  
30 299 Feasibility (quantitative)31  
32 300 To generate the quantitative feasibility outcomes, we adopted the categories described by  
3334 301 Thabane and colleagues<sup>30</sup> and promoted for exercise studies in MS by Learmonth and Motl<sup>31</sup>  
3536 302 (see Table 4).  
37  
38  
39  
40  
41  
42  
43  
44  
45  
46  
47  
48  
49  
50  
51  
52  
53  
54  
55  
56  
57  
58  
59  
60



303 **Table 4** Description of quantitative feasibility outcomes (adapted from<sup>32</sup>).

| Classification | Outcome                 | Operationalization                                                                                                                                                                                                                                                                                                                                                                                                                                                                                                                                                                                               | Importance for future RCT                                                                                                                                                                                                                                                                                                                                |
|----------------|-------------------------|------------------------------------------------------------------------------------------------------------------------------------------------------------------------------------------------------------------------------------------------------------------------------------------------------------------------------------------------------------------------------------------------------------------------------------------------------------------------------------------------------------------------------------------------------------------------------------------------------------------|----------------------------------------------------------------------------------------------------------------------------------------------------------------------------------------------------------------------------------------------------------------------------------------------------------------------------------------------------------|
| Process        | 1. Recruitment rate     | <ul style="list-style-type: none"> <li>Number of patients successfully randomized per month</li> </ul>                                                                                                                                                                                                                                                                                                                                                                                                                                                                                                           | Evaluates whether the number of patients participating is high enough to allow for a time-efficient conductance of a study with a larger sample size                                                                                                                                                                                                     |
|                | 2. Retention rate       | <ul style="list-style-type: none"> <li>Number of patients completing the intervention period, relative to patients dropping out before T<sub>1</sub></li> <li>Number of patients returning the WEIMuS at T<sub>2</sub>, relative to patients not responding</li> </ul>                                                                                                                                                                                                                                                                                                                                           | <p>Provides information on the risk of subjects dropping out during the intervention period, which might necessitate adaptations to the interventions or the organization of the study to reduce dropouts.</p> <p>Gives information on the feasibility of the primary endpoint and outcome being assessed post-discharge and via an online platform.</p> |
|                | 3. Refusal rate         | <ul style="list-style-type: none"> <li>Number of patients eligible and willing to participate, relative to patients eligible but unwilling to participate (with reasons)</li> </ul>                                                                                                                                                                                                                                                                                                                                                                                                                              | Provides insights on possible barriers for participation, which might be counteracted by better study information and addressing these barriers.                                                                                                                                                                                                         |
|                | 4. Eligibility criteria | <ul style="list-style-type: none"> <li>Number of positive versus negative cases for each criterium</li> </ul>                                                                                                                                                                                                                                                                                                                                                                                                                                                                                                    | Determines criteria that might produce too many non-eligible patients                                                                                                                                                                                                                                                                                    |
|                | 5. Adherence            | <ul style="list-style-type: none"> <li>Number of therapy sessions conducted relative to sessions scheduled</li> </ul>                                                                                                                                                                                                                                                                                                                                                                                                                                                                                            | Gives information on how many sessions would normally be feasible to conduct during the inpatient stay                                                                                                                                                                                                                                                   |
|                | 6. Fidelity             | <ul style="list-style-type: none"> <li>SET: training protocols will be reviewed to ensure that communicated principles were followed: (I) number of exercises performed each session, (II) total training load prescribed relative to actual training load per exercise (e.g., target: 3 (sets) x 10 (repetitions) x 20 (weight) = 600, moved: 3 x 10 x 15 = 450, percentage: 75%). The ers.2 software will document all endurance training sessions, which will provide measures of training duration and intensity (average heart rate, average power, 6-20 RPE) relative to the prescribed values.</li> </ul> | Gives detailed information on whether subjects were able to perform the SET as planned. In the MAT, therapist's usage of the manual will be observable. This will allow for guided adaptations of the intervention protocols, if necessary.                                                                                                              |

|                   |                     |                                                                                                                                                                                                                                                                                                                                                                                                                                                                                                                                                                                                                                                                        |                                                                                                                                                                                                                                                                                |
|-------------------|---------------------|------------------------------------------------------------------------------------------------------------------------------------------------------------------------------------------------------------------------------------------------------------------------------------------------------------------------------------------------------------------------------------------------------------------------------------------------------------------------------------------------------------------------------------------------------------------------------------------------------------------------------------------------------------------------|--------------------------------------------------------------------------------------------------------------------------------------------------------------------------------------------------------------------------------------------------------------------------------|
|                   |                     | <ul style="list-style-type: none"> <li>• MAT: To quantify the degree of aerobic challenge, in the land-based sessions, patients will be wearing heart rate sensors (Verity Sense, Polar, Kempele, Finland). Average heart rate values for each session and patient will be tracked using software (Polar Team App).</li> <li>• MAT: Components of each session will be coded by the operating therapist according to the MAT manual (SB = standing balance, DB = dynamic balance and functional leg strength, AG = agility-like) to get an approximate distribution.</li> </ul>                                                                                        |                                                                                                                                                                                                                                                                                |
| <b>Resources</b>  | Time                | <ul style="list-style-type: none"> <li>• Number of days needed to complete baseline assessments</li> <li>• Time requirements for (I) the first (T25FW, SSST, FGA, 6MWT) and second (GXT) physical testing blocks at T<sub>0</sub> and T<sub>1</sub>, (II) preparation of MAT sessions</li> </ul>                                                                                                                                                                                                                                                                                                                                                                       | Evaluates whether baseline assessments can be scheduled in a timely manner before the start of the intervention period. Precise time requirements will allow for better scheduling of study-related appointments.                                                              |
| <b>Management</b> | Data                | <ul style="list-style-type: none"> <li>• Number of missing items for FSMC and WEIMuS for all measurement timepoints</li> <li>• Number of missing outcomes for T<sub>0</sub> and T<sub>1</sub></li> </ul>                                                                                                                                                                                                                                                                                                                                                                                                                                                               | Provides information on actions to take to ensure questionnaires will be fully completed and all assessments taken.                                                                                                                                                            |
| <b>Scientific</b> | 1. Adverse events   | <ul style="list-style-type: none"> <li>• Number and kind of adverse events related to study interventions</li> </ul>                                                                                                                                                                                                                                                                                                                                                                                                                                                                                                                                                   | Establishes the safety of all interventions.                                                                                                                                                                                                                                   |
|                   | 2. Acceptability    | <ul style="list-style-type: none"> <li>• Perceived exertion: Session-RPE after each endurance, strength, and MAT session (Category Ratio (CR-10) RPE scale as developed by Foster and colleagues<sup>33 34</sup>). After each session patients will be asked: “How strenuous was the session as a whole?”. Patients will be instructed to provide a global rating of the complete session and not to focus on specific aspects.</li> <li>• Fun during training and relevance of training for daily life: assessed at T<sub>1</sub> by using customized questions with a four-point Likert-type scale ranging from “not at all” to “very much”<sup>35</sup>.</li> </ul> | Perceived exertion in both groups will determine whether the interventions are perceived to be too strenuous or too easy. Fun and relevance are important measures of motivation. In case of low values, additional actions will be necessary to ensure sufficient motivation. |
|                   | 3. Treatment effect | <ul style="list-style-type: none"> <li>• Estimation of treatment effect (Cohen’s <i>d</i>) on all primary and secondary outcomes</li> </ul>                                                                                                                                                                                                                                                                                                                                                                                                                                                                                                                            | Establishes data for possible impact of interventions                                                                                                                                                                                                                          |

1  
2  
3 304 *RCT* = randomized-controlled trial;  $T_0$  = post-randomization;  $T_1$  = prior to discharge;  $T_2$  = 1 - 2 weeks after discharge; *WEIMuS* = Würzburg  
4  
5 305 Fatigue Inventory for Multiple Sclerosis; *MAT* = Multimodal Agility-based exercise Training; *SET* = Strength and Endurance Training; *RPE* =  
6  
7 306 Rated Perceived Exertion; *GXT* = Graded Exercise Test; *T25FW* = Timed 25-foot Walk Test; *SSST* = Six Spot Step Test; *FGA* = Functional Gait  
8  
9  
10 307 Assessment; *FSMC* = Fatigue Scale for Motor and Cognitive Functions  
11  
12  
13  
14  
15  
16  
17  
18  
19  
20  
21  
22  
23  
24  
25  
26  
27  
28  
29  
30  
31  
32  
33  
34  
35  
36  
37  
38  
39  
40  
41  
42  
43  
44  
45  
46

1  
2  
3 308 Feasibility (qualitative)  
4

5 309 The qualitative evaluation aims to (a) capture patients' views on acceptance, benefits, and  
6  
7 310 satisfaction with study participation, (b) assess their experiences with the intervention methods,  
8  
9 311 and (c) identify necessary adaptations. For this purpose, we designed a semi-structured interview.  
10  
11 312 Six participants from each study arm will be interviewed face-to-face at T<sub>1</sub>. The selection of  
12  
13 313 participants will reflect the greatest possible diversity in terms of gender, age, and EDSS<sup>36</sup>. The  
14  
15 314 interview will include a total of 14 questions and will last approximately 20min. Key categories  
16  
17 315 of the interview are the concept of fatigue, experiences and demands of the interventions,  
18  
19 316 personal relevance, and goal achievement. All interviews will be recorded digitally and  
20  
21 317 transcribed verbatim by an independent transcription service.  
22  
23  
24

25  
26 318 Both interviewers (JN, FW) have several years of clinical experience with pwMS. A first draft  
27  
28 319 of this interview was piloted with three pwMS prior to the start of the feasibility study to ensure  
29  
30 320 that the questions allow valid insights into participants' experiences.  
31

32  
33 321 The interview will be supplemented by a customized questionnaire asking for prior knowledge  
34  
35 322 of fatigue, prior experiences with MAT and SET, and comprehensibility of the study  
36  
37 323 instructions and questionnaires. The questionnaire also asks about fun and relevance of training  
38  
39 324 for daily life (see Table 4), and the motivation to continue a comparable training at home.  
40  
41  
42

43 325

44 326 Primary outcome for the full RCT  
45

46  
47 327 Fatigue questionnaires presuppose internal averaging of the amount of fatigue experienced  
48  
49 328 during a certain timeframe<sup>1</sup>. This has been a problem for studies evaluating short-term  
50  
51 329 interventions, as in some questionnaires patients are asked to evaluate their fatigue in  
52  
53 330 timeframes of up to four weeks. As we are interested in the change in fatigue experienced in  
54  
55 331 daily life from before the inpatient stay to afterwards, we (I) chose the WEIMuS<sup>37</sup> as the  
56  
57 332 primary outcome measure to assess the fatigue experienced during the past week and (II)  
58  
59  
60

1  
2  
3 333 established the primary endpoint to be one to two weeks after participants have returned home  
4  
5 334 (T<sub>2</sub>). The WEIMuS has 17 items (scored 0 - 4) with higher total scores indicating higher fatigue  
6  
7 335 (range 0 – 68, cut-off for classification as fatigued: 32).

8  
9  
10 336 For fatigue screening (that is necessary for study eligibility) we will apply the FSMC. It is a 20  
11  
12 337 item Likert-type scale (1 – 5) with a total score (0 – 100) and two subscales relating to motor  
13  
14 338 and cognitive fatigue<sup>38</sup>. The FSMC provides cut-off scores to classify cases of no (total score  
15  
16 339 < 43), mild ( $\geq 43$ ), moderate ( $\geq 53$ ) and severe ( $\geq 63$ ) fatigue, which makes it especially suitable  
17  
18 340 as a tool for classification of fatigue severity<sup>1 38</sup>.

19  
20 341 Paper versions of both questionnaires will be handed out to participants. When at home,  
21  
22 342 participants will be followed up via e-mail to fill out questionnaires on an online platform  
23  
24 343 (Qualtrics) at timepoints T<sub>2</sub>-T<sub>4</sub>. Participants will be able to respond to the e-mail request within  
25  
26 344 seven days.

27  
28  
29  
30 345

31  
32  
33 346 Secondary outcomes for the full RCT

34  
35 347 MS-fatigue is a multifactorial construct that requires assessment of other interrelated  
36  
37 348 constructs<sup>7</sup>. This will include measures of cognitive (Test Battery of Attention Performance –  
38  
39 349 Alertness<sup>39</sup>) and motor fatigability (6-Minute Walk Test [6MWT], Distance Walked Index<sup>40</sup>),  
40  
41 350 cognitive performance (California Verbal Learning Test, Symbol Digit Modalities Test<sup>24 41</sup>)  
42  
43 351 and cardiorespiratory fitness (GXT on a cycle ergometer, protocol: start 25W, progression  
44  
45 352 10W/min.). Dynamic balance and motor function (Timed 25-Foot Walk Test [T25FW], Six  
46  
47 353 Spot Step Test [SSST], Functional Gait Assessment [FGA]) will also be assessed as well as  
48  
49 354 self-reported balance confidence (Activities-specific Balance Confidence scale). Depression  
50  
51 355 (Center for Epidemiological Studies Depression Scale [German version]) will be assessed as a  
52  
53  
54  
55  
56 356 confounder variable.  
57  
58  
59  
60

1  
2  
3 357 The subsequent full trial will also include qualitative data to explore the subjective experiences  
4  
5 358 in participants showing a WEIMuS change of 6 or more points from T<sub>0</sub> to T<sub>2</sub> (positive or  
6  
7 359 negative). These “responders” will be contacted for a short telephone interview. Previous data  
8  
9  
10 360 has shown large differences in fatigue questionnaire change scores<sup>13</sup>. However, the scores do  
11  
12 361 not provide any detail on individual circumstances, including, for example, social or work-  
13  
14 362 related influences, that might be independent of intervention effects. Therefore, we decided to  
15  
16  
17 363 specifically ask participants:

18  
19 364 ‘The analysis of your questionnaires shows a relevant positive/negative change of  
20  
21 365 your fatigue symptoms, when comparing your scores from pre-rehab to the online  
22  
23 366 questionnaire. What do you personally think is the reason for this?’.

24  
25  
26 367 No minimal clinically relevant change scores have been established yet<sup>42</sup>. Thus, the relevant  
27  
28 368 change score was chosen as a pragmatic value of 0.5 SD from the validation study<sup>43</sup>. A similar  
29  
30 369 procedure has been described by Sander and colleagues<sup>1</sup>.

31  
32  
33 370

## 34 35 371 **Data analysis**

### 36 37 372 Quantitative data analysis

38  
39  
40 373 Descriptive statistics will be used to summarize feasibility outcomes. The results are given as  
41  
42 374 mean and standard deviation for parametric distribution, median and interquartile range for  
43  
44 375 non-parametric distribution, or frequencies (%), as appropriate. Baseline data for  
45  
46 376 sociodemographic, primary, and secondary outcomes will be compared between SET and  
47  
48 377 MAT groups using independent-samples *t*-tests for continuous data, and chi-squared tests for  
49  
50 378 categorical data. Paired *t*-tests will be used to assess within-group change over time.  
51  
52 379 Independent-samples *t*-tests will be used on change scores (post- vs. pre-rehabilitation) to  
53  
54 380 assess between-group effects. In case of non-normal distributions, non-parametric tests will be  
55  
56 381 used. As described by Sim<sup>44</sup>, estimation of treatment effects (Cohen’s *d*) will be conducted and  
57  
58  
59  
60

1  
2  
3 382 reported with 95% confidence intervals but will not be used as a progression requirement. All  
4  
5 383 analyses will be performed using IBM SPSS Statistics in the most up to date version.  
6  
7  
8 384

9  
10 385 **Qualitative data analysis**

11  
12 386 Coding of the interviews will be performed according to qualitative content analysis, using a  
13  
14 387 combined model of deductive (a priori) and inductive coding (on the text material) to identify  
15  
16 388 themes and sub-themes<sup>45</sup>. Deductive coding will be based on preliminary considerations and  
17  
18 389 hypotheses in the study planning and on reviews of relevant literature. Coding will be carried  
19  
20 390 out by at least two individuals (JN, FW) to ensure intercoder reliability<sup>46</sup>. The analysis will be  
21  
22 391 supported by MAXQDA® software in the most up to date version<sup>47</sup>. JN and FW will compile  
23  
24 392 the themes emerging from the interview data and discuss these with the wider research team.  
25  
26  
27  
28  
29

30  
31 394 **Progression requirements to full RCT**

32  
33 395 Falling short of the following feasibility values will necessitate changes to the protocol of the  
34  
35 396 full RCT:

- 36  
37  
38 397
- 39 • Adherence: Average of at least 18 therapy sessions during the stay (equals 6x30min  
40 sessions per week for 3 weeks [28 days admission to discharge minus 5 days for pre-  
41 and post-testing])  
42 399
  - 43 • Recruitment rate: 4 participants/month, <25% non-eligible pwMS, <10% eligible but  
44 unwilling to participate  
45 400
  - 46 • Drop-out before T<sub>1</sub>: <10%  
47 401
  - 48 • Retention at T<sub>2</sub>: >80%  
49 402
  - 50 • Time requirements for baseline assessments: >80% able to complete all assessments  
51 403
  - 52 within the first three days of therapy  
53 404
  - 54  
55  
56 405
  - 57  
58  
59  
60

- 1  
2  
3 406       • If the interview statements indicate that the interventions are perceived as irrelevant,  
4  
5 407           not comprehensible, or even unpleasant  
6  
7  
8 408

9  
10 409   **Data management**  
11

12 410   The principal investigator (FW) will be responsible for data management. Demographic and  
13  
14 411   clinical characteristics will be taken from the electronic health record. All other data will be  
15  
16 412   collected on forms during the inpatient stay and via an online tool for follow-up. Data will be  
17  
18 413   entered into a secure internal network database by study personnel in the NRC. Entered data  
19  
20 414   will be checked for plausibility and compared to the collection forms if necessary. Data will be  
21  
22 415   collected and stored in accordance with the General Data Protection Regulation.  
23  
24  
25

26 416

27  
28 417   **ETHICS AND DISSEMINATION**  
29

30 418   Written informed consent will be obtained from each participant. Ethical approval was  
31  
32 419   obtained from the Ethics Committee at the Medical Faculty, University of Bonn (reference  
33  
34 420   number: 543/20).  
35  
36

37 421   The results of this feasibility study will be disseminated regardless of the magnitude or  
38  
39 422   direction of effect in peer-reviewed journals, conferences and the website and magazines of the  
40  
41 423   German Sport University Cologne.  
42  
43

44 424

45  
46  
47 425   **DISCUSSION**  
48

49 426   This PAFS will give relevant insights for conducting a future RCT in this special setting of  
50  
51 427   inpatient rehabilitation for pwMS. Content-wise, it will (I) translate existing evidence on  
52  
53 428   BMCT in pwMS to this setting, (II) add to this BMCT by introducing the framework of MAT,  
54  
55 429   and (III) apply a clear focus on fatigue as the primary outcome. Specifically, we see the  
56  
57 430   potential of a relatively large training volume (e.g., about eight therapy sessions per week)  
58  
59  
60



1  
2  
3 431 compared to studies in outpatient settings, and a high amount of supervised exercise, which  
4  
5 432 should provide good adherence and fidelity. Having a therapist as a supervisor is especially  
6  
7  
8 433 important for a rather complex type of exercise as is MAT. For example, there are no simple  
9  
10 434 ‘numbers’ like sets or repetitions one can follow. Quicker movements relating to agility, like  
11  
12 435 changes of direction, acceleration, and deceleration, frequently lie outside the ‘comfort zone’  
13  
14 436 of pwMS, which necessitates guidance of a therapist. Lastly, in the group format, a therapist is  
15  
16  
17 437 mandatory to provide modifications for pwMS with higher disability or very low disability.  
18  
19 438 We also anticipate certain issues in conducting this study. For example, scheduling of  
20  
21 439 appointments for testing will be challenging, as there will be several testing blocks (i.e., motor  
22  
23 440 function, GXT, cognitive tests, interview), conducted in different departments of the NRC,  
24  
25 441 which must be fitted into certain timeslots around admission and discharge. These  
26  
27  
28 442 appointments will compete against other study unrelated appointments (e.g., ward rounds,  
29  
30 443 urology assessments, etc.). Regarding the eligibility and randomization criteria, it will be  
31  
32  
33 444 challenging to have all the correct data within the first two days as there can be delays in the  
34  
35 445 admission process.  
36  
37 446 Lastly, analysis of blood-based biomarkers is planned to be part of the ReFEx study project.  
38  
39 447 However, as these outcomes are connected to comparably high costs for materials and analysis,  
40  
41 448 addition of blood sampling is postponed to the start of a full RCT. Nevertheless, information  
42  
43 449 gathered during the feasibility study will be used to allow for smooth integration of blood draws  
44  
45 450 and storage during assessments at admission and discharge. As the blood draws can be regarded  
46  
47 451 as the most unpleasant part of the assessments for patients, feasibility of the interventions and  
48  
49 452 patient acceptance should be established first.  
50  
51  
52  
53  
54 453

#### 56 454 **Author contributions**

57  
58  
59  
60

1  
2  
3 455 FW, JN, ME, PZ designed the overall study. FW & JN designed the feasibility study and wrote  
4  
5 456 the protocol. FW, JN, JS, EH implemented the screening and assessment procedures. All  
6  
7 457 authors revised the manuscript. All authors read and approved the final manuscript.  
8  
9

10 458

## 11 459 **Funding**

12  
13  
14 460 This work was supported by the Internal Research Funds of the German Sport University  
15  
16 461 Cologne, Cologne, Germany, grant agreement number L-11-10011-238-102000.  
17  
18

19 462

## 20 463 **Competing interests**

21  
22  
23 464 FW: none. JN: none. JS: none. EH: none. ME: none. AKF has received grants from the German  
24  
25 465 Parkinson Society and the German Alzheimer's Society, as well as honoraria from ProLog  
26  
27 466 Wissen GmbH, Cologne, Germany, pro audito Switzerland, Zürich, Switzerland, Seminar- und  
28  
29 467 Fortbildungszentrum Rheine, Germany, and LOGOMANIA, Fendt & Sax GbR, Munich,  
30  
31 468 Germany. AFK is author of the cognitive training program NEUROvitalis but receives no  
32  
33 469 corresponding honoraria. HK: none. PZ: none.  
34  
35  
36  
37

38 470

## 39 471 **REFERENCES**

- 40  
41  
42 472 1. Sander C, Voelter H-U, Schlake H-P, et al. Assessment of Fatigue in Multiple Sclerosis.  
43  
44 473 *Neurology International Open* 2017;1(02):E79-E85. doi: 10.1055/s-0043-104752  
45  
46  
47 474 2. Rommer PS, Eichstadt K, Ellenberger D, et al. Symptomatology and symptomatic treatment  
48  
49 475 in multiple sclerosis: Results from a nationwide MS registry. *Mult Scler* 2019;25(12):1641-52.  
50  
51 476 doi: 10.1177/1352458518799580 [published Online First: 2018/09/20]  
52  
53  
54 477 3. Barin L, Salmen A, Disanto G, et al. The disease burden of Multiple Sclerosis from the  
55  
56 478 individual and population perspective: Which symptoms matter most? *Mult Scler Relat Disord*  
57  
58 479 2018;25:112-21. doi: 10.1016/j.msard.2018.07.013 [published Online First: 2018/07/31]  
59  
60

- 1  
2  
3 480 4. Kobelt G, Langdon D, Jönsson L. The effect of self-assessed fatigue and subjective cognitive  
4  
5 481 impairment on work capacity: The case of multiple sclerosis. *Mult Scler* 2019;25(5):740-49.  
6  
7 482 doi: 10.1177/1352458518769837 [published Online First: 20180417]  
8  
9  
10 483 5. Nielsen J, Schnell R, Markett S, et al. Are “invisible MS symptoms” (fatigue, cognitive  
11  
12 484 dysfunction, depression) significant in the professional performance assessment of multiple  
13  
14 485 sclerosis patients two years after the inpatient primary evaluation? *Zeitschrift für*  
15  
16 486 *Neuropsychologie* 2020;31(1):11-25. doi: 10.1024/1016-264X/a000280  
17  
18  
19 487 6. Manjaly ZM, Harrison NA, Critchley HD, et al. Pathophysiological and cognitive  
20  
21 488 mechanisms of fatigue in multiple sclerosis. *J Neurol Neurosurg Psychiatry* 2019;90(6):642-  
22  
23 489 51. doi: 10.1136/jnnp-2018-320050 [published Online First: 20190125]  
24  
25  
26 490 7. Kluger BM, Krupp LB, Enoka RM. Fatigue and fatigability in neurologic illnesses: proposal  
27  
28 491 for a unified taxonomy. *Neurology* 2013;80(4):409-16. doi: 10.1212/WNL.0b013e31827f07be  
29  
30 492 [published Online First: 2013/01/23]  
31  
32  
33 493 8. Behrens M, Broscheid K-C, Schega L. Taxonomie und Determinanten motorischer  
34  
35 494 Performance Fatigability bei Multipler Sklerose [Taxonomy and determinants of motor  
36  
37 495 performance fatigability in multiple sclerosis]. *Neurologie und Rehabilitation* 2021;27:3-12.  
38  
39 496 doi: 10.14624/NR2101001  
40  
41  
42 497 9. Loy BD, Taylor RL, Fling BW, et al. Relationship between perceived fatigue and  
43  
44 498 performance fatigability in people with multiple sclerosis: A systematic review and meta-  
45  
46 499 analysis. *J Psychosom Res* 2017;100:1-7. doi: 10.1016/j.jpsychores.2017.06.017 [published  
47  
48 500 Online First: 2017/08/10]  
49  
50  
51 501 10. Langeskov-Christensen M, Bisson EJ, Finlayson ML, et al. Potential pathophysiological  
52  
53 502 pathways that can explain the positive effects of exercise on fatigue in multiple sclerosis: A  
54  
55 503 scoping review. *J Neurol Sci* 2017;373:307-20. doi: 10.1016/j.jns.2017.01.002 [published  
56  
57 504 Online First: 2017/01/31]  
58  
59  
60

- 1  
2  
3 505 11. Moss-Morris R, Harrison AM, Safari R, et al. Which behavioural and exercise interventions  
4  
5 506 targeting fatigue show the most promise in multiple sclerosis? A systematic review with  
6  
7 507 narrative synthesis and meta-analysis. *Behav Res Ther* 2021;137:103464. doi:  
8  
9 508 10.1016/j.brat.2019.103464 [published Online First: 2019/11/30]  
10  
11  
12 509 12. Motl RW, Sandroff BM, Kwakkel G, et al. Exercise in patients with multiple sclerosis. *The*  
13  
14 510 *Lancet Neurology* 2017;16(10):848-56. doi: 10.1016/s1474-4422(17)30281-8  
15  
16  
17 511 13. Wolf F, Rademacher A, Joisten N, et al. The aerobic capacity – fatigue relationship in  
18  
19 512 persons with Multiple Sclerosis is not reproducible in a pooled analysis of two randomized  
20  
21 513 controlled trials. *Multiple Sclerosis and Related Disorders* 2022;58:103476. doi:  
22  
23 514 <https://doi.org/10.1016/j.msard.2021.103476>  
24  
25  
26 515 14. Callesen J, Cattaneo D, Brincks J, et al. How do resistance training and balance and motor  
27  
28 516 control training affect gait performance and fatigue impact in people with multiple sclerosis?  
29  
30 517 A randomized controlled multi-center study. *Mult Scler* 2020;26(11):1420-32. doi:  
31  
32 518 10.1177/1352458519865740 [published Online First: 20190724]  
33  
34  
35 519 15. Hebert JR, Corboy JR. The association between multiple sclerosis-related fatigue and  
36  
37 520 balance as a function of central sensory integration. *Gait Posture* 2013;38(1):37-42. doi:  
38  
39 521 10.1016/j.gaitpost.2012.10.015 [published Online First: 20121128]  
40  
41  
42 522 16. Hebert JR, Corboy JR, Vollmer T, et al. Efficacy of Balance and Eye-Movement Exercises  
43  
44 523 for Persons With Multiple Sclerosis (BEEMS). *Neurology* 2018;90(9):e797-e807. doi:  
45  
46 524 10.1212/WNL.0000000000005013 [published Online First: 2018/02/02]  
47  
48  
49 525 17. Tholen R, Dettmers C, Henze T, et al. Bewegungstherapie zur Verbesserung der Mobilität  
50  
51 526 von Patienten mit Multipler Sklerose : Konsensusfassung für die S2e-Leitlinie der DGNR in  
52  
53 527 Zusammenarbeit mit Physio Deutschland – Deutscher Verband für Physiotherapie (ZVK) e.  
54  
55 528 *V. Neurologie und Rehabilitation* 2019;25(1):3-40. doi: 10.14624/NR1902001  
56  
57  
58  
59  
60

- 1  
2  
3 529 18. Donath L, van Dieen J, Faude O. Exercise-Based Fall Prevention in the Elderly: What  
4  
5 530 About Agility? *Sports Med* 2016;46(2):143-9. doi: 10.1007/s40279-015-0389-5 [published  
6  
7 531 Online First: 2015/09/24]  
8  
9  
10 532 19. Motl RW, Sandroff BM, DeLuca J. Exercise Training and Cognitive Rehabilitation: A  
11  
12 533 Symbiotic Approach for Rehabilitating Walking and Cognitive Functions in Multiple  
13  
14 534 Sclerosis? *Neurorehabil Neural Repair* 2016;30(6):499-511. doi: 10.1177/1545968315606993  
15  
16 535 [published Online First: 2016/06/05]  
17  
18 536 20. Hebert JR, Corboy JR, Manago MM, et al. Effects of vestibular rehabilitation on multiple  
19  
20 537 sclerosis-related fatigue and upright postural control: a randomized controlled trial. *Phys Ther*  
21  
22 538 2011;91(8):1166-83. doi: 10.2522/ptj.20100399 [published Online First: 20110616]  
23  
24 539 21. Scott NW, McPherson GC, Ramsay CR, et al. The method of minimization for allocation  
25  
26 540 to clinical trials: a review. *Controlled Clinical Trials* 2002;23(6):662-74. doi:  
27  
28 541 [https://doi.org/10.1016/S0197-2456\(02\)00242-8](https://doi.org/10.1016/S0197-2456(02)00242-8)  
29  
30 542 22. Charlesworth G, Burnell K, Hoe J, et al. Acceptance checklist for clinical effectiveness  
31  
32 543 pilot trials: a systematic approach. *BMC Med Res Methodol* 2013;13:78. doi: 10.1186/1471-  
33  
34 544 2288-13-78 [published Online First: 20130613]  
35  
36 545 23. Ladlow P, Coppack RJ, Dharm-Datta S, et al. The effects of low-intensity blood flow  
37  
38 546 restricted exercise compared with conventional resistance training on the clinical outcomes of  
39  
40 547 active UK military personnel following a 3-week in-patient rehabilitation programme: protocol  
41  
42 548 for a randomized controlled feasibility study. *Pilot Feasibility Stud* 2017;3:71. doi:  
43  
44 549 10.1186/s40814-017-0216-x [published Online First: 20171208]  
45  
46 550 24. Zimmer P, Bloch W, Schenk A, et al. High-intensity interval exercise improves cognitive  
47  
48 551 performance and reduces matrix metalloproteinases-2 serum levels in persons with multiple  
49  
50 552 sclerosis: A randomized controlled trial. *Mult Scler* 2018;24(12):1635-44. doi:  
51  
52 553 10.1177/1352458517728342 [published Online First: 2017/08/22]  
53  
54  
55  
56  
57  
58  
59  
60

- 1  
2  
3 554 25. Voigt-Radloff S, Stemmer R, Korporal J, et al. Forschung zu komplexen Interventionen in  
4  
5 555 der Pflege- und Hebammenwissenschaft und in den Wissenschaften der Physiotherapie,  
6  
7 556 Ergotherapie und Logopädie: ein forschungsmethodischer Leitfaden zur Ermittlung,  
8  
9 557 Evaluation und Implementation evidenzbasierter Innovationen; Version 2. 2016 doi:  
10  
11 558 10.6094/UNIFR/10702  
12  
13  
14 559 26. Page P, Hoogenboom B, Voight M. IMPROVING THE REPORTING OF  
15  
16 560 THERAPEUTIC EXERCISE INTERVENTIONS IN REHABILITATION RESEARCH. *Int J*  
17  
18 561 *Sports Phys Ther* 2017;12(2):297-304.  
19  
20  
21 562 27. Kalb R, Brown TR, Coote S, et al. Exercise and lifestyle physical activity recommendations  
22  
23 563 for people with multiple sclerosis throughout the disease course. *Mult Scler* 2020;26(12):1459-  
24  
25 564 69. doi: 10.1177/1352458520915629 [published Online First: 2020/04/24]  
26  
27  
28 565 28. Morat M, Morat T, Zijlstra W, et al. Effects of multimodal agility-like exercise training  
29  
30 566 compared to inactive controls and alternative training on physical performance in older adults:  
31  
32 567 a systematic review and meta-analysis. *Eur Rev Aging Phys Act* 2021;18(1):4. doi:  
33  
34 568 10.1186/s11556-021-00256-y [published Online First: 20210225]  
35  
36  
37 569 29. Nielsen JB, Willerslev-Olsen M, Christiansen L, et al. Science-based neurorehabilitation:  
38  
39 570 recommendations for neurorehabilitation from basic science. *J Mot Behav* 2015;47(1):7-17.  
40  
41 571 doi: 10.1080/00222895.2014.931273  
42  
43  
44 572 30. Thabane L, Ma J, Chu R, et al. A tutorial on pilot studies: the what, why and how. *BMC*  
45  
46 573 *Med Res Methodol* 2010;10:1. doi: 10.1186/1471-2288-10-1 [published Online First:  
47  
48 574 20100106]  
49  
50  
51 575 31. Learmonth YC, Motl RW. Important considerations for feasibility studies in physical  
52  
53 576 activity research involving persons with multiple sclerosis: a scoping systematic review and  
54  
55 577 case study. *Pilot Feasibility Stud* 2018;4:1. doi: 10.1186/s40814-017-0145-8 [published Online  
56  
57 578 First: 20170609]  
58  
59  
60

- 1  
2  
3 579 32. Hubbard EA, Motl RW, Elmer DJ. Feasibility and initial efficacy of a high-intensity  
4  
5 580 interval training program using adaptive equipment in persons with multiple sclerosis who have  
6  
7 581 walking disability: study protocol for a single-group, feasibility trial. *Trials* 2020;21(1):972.  
8  
9 582 doi: 10.1186/s13063-020-04887-x [published Online First: 20201125]  
10  
11  
12 583 33. Foster C, Florhaug JA, Franklin J, et al. A new approach to monitoring exercise training. *J*  
13  
14 584 *Strength Cond Res* 2001;15(1):109-15.  
15  
16  
17 585 34. Haddad M, Stylianides G, Djaoui L, et al. Session-RPE Method for Training Load  
18  
19 586 Monitoring: Validity, Ecological Usefulness, and Influencing Factors. *Front Neurosci*  
20  
21 587 2017;11:612. doi: 10.3389/fnins.2017.00612 [published Online First: 20171102]  
22  
23  
24 588 35. Gooßes M, Saliger J, Folkerts A-K, et al. Feasibility of Music-Assisted Treadmill Training  
25  
26 589 in Parkinson's Disease Patients With and Without Deep Brain Stimulation: Insights From an  
27  
28 590 Ongoing Pilot Randomized Controlled Trial. *Frontiers in Neurology* 2020;11(790) doi:  
29  
30 591 10.3389/fneur.2020.00790  
31  
32  
33 592 36. Hersche R, Weise A, Michel G, et al. Three-week inpatient energy management education  
34  
35 593 (IEME) for persons with multiple sclerosis-related fatigue: Feasibility of a randomized clinical  
36  
37 594 trial. *Mult Scler Relat Disord* 2019;35:26-33. doi: 10.1016/j.msard.2019.06.034 [published  
38  
39 595 Online First: 20190629]  
40  
41  
42 596 37. Flachenecker P, Muller G, Konig H, et al. ["Fatigue" in multiple sclerosis. Development  
43  
44 597 and and validation of the "Wurzburger Fatigue Inventory for MS"]. *Nervenarzt*  
45  
46 598 2006;77(2):165-6, 68-70, 72-4. doi: 10.1007/s00115-005-1990-x  
47  
48  
49 599 38. Penner IK, Raselli C, Stocklin M, et al. The Fatigue Scale for Motor and Cognitive  
50  
51 600 Functions (FSMC): validation of a new instrument to assess multiple sclerosis-related fatigue.  
52  
53 601 *Mult Scler* 2009;15(12):1509-17. doi: 10.1177/1352458509348519 [published Online First:  
54  
55 602 2009/12/10]  
56  
57  
58  
59  
60

- 1  
2  
3 603 39. Dettmers C, Marchione S, Weimer-Jaekel A, et al. Cognitive Fatigability, not Fatigue  
4  
5 604 predicts employment status in patients with MS three months after rehabilitation. *Mult Scler*  
6  
7 605 *Relat Disord* 2021;56:103215. doi: 10.1016/j.msard.2021.103215 [published Online First:  
8  
9 606 20210819]
- 10  
11  
12 607 40. Van Geel F, Veldkamp R, Severijns D, et al. Day-to-day reliability, agreement and  
13  
14 608 discriminative validity of measuring walking-related performance fatigability in persons with  
15  
16 609 multiple sclerosis. *Mult Scler* 2020;26(13):1785-89. doi: 10.1177/1352458519872465  
17  
18 610 [published Online First: 20190909]
- 19  
20  
21 611 41. Costa SL, Genova HM, DeLuca J, et al. Information processing speed in multiple sclerosis:  
22  
23 612 Past, present, and future. *Mult Scler* 2017;23(6):772-89. doi: 10.1177/1352458516645869  
24  
25 613 [published Online First: 20160509]
- 26  
27  
28 614 42. Flachenecker P, Bures AK, Gawlik A, et al. Efficacy of an Internet-Based Program to  
29  
30 615 Promote Physical Activity and Exercise after Inpatient Rehabilitation in Persons with Multiple  
31  
32 616 Sclerosis: A Randomized, Single-Blind, Controlled Study. *Int J Environ Res Public Health*  
33  
34 617 2020;17(12) doi: 10.3390/ijerph17124544 [published Online First: 20200624]
- 35  
36  
37 618 43. Flachenecker P, König H, Meissner H, et al. Fatigue in multiple sclerosis: Validation of the  
38  
39 619 WEIMuS scale ("Würzburger Erschöpfungs-Inventar bei Multipler Sklerose"). *Neurologie und*  
40  
41 620 *Rehabilitation* 2008;14:299-306.
- 42  
43  
44 621 44. Sim J. Should treatment effects be estimated in pilot and feasibility studies? *Pilot*  
45  
46 622 *Feasibility Stud* 2019;5:107. doi: 10.1186/s40814-019-0493-7 [published Online First:  
47  
48 623 20190828]
- 49  
50  
51 624 45. Kuckartz U. Qualitative Inhaltsanalyse. Methoden, Praxis, Computerunterstützung, Beltz  
52  
53 625 Verlagsgruppe: Weinheim, 2018.
- 54  
55  
56 626 46. Flick U. Qualitative Sozialforschung: eine Einführung (6. Auflage, Originalausgabe.).  
57  
58 627 *Reinbek bei Hamburg: rowohlts enzyklopädie im Rowohlt Taschenbuch Verlag* 2014  
59  
60



1  
2  
3 628 47. Rädiker S, Kuckartz U. Analyse qualitativer Daten mit MAXQDA: Text, Audio und Video.  
4  
5  
6 629 Wiesbaden: Springer VS 2019.  
7  
8 630  
9  
10 631  
11 632  
12 633 I, the Submitting Author has the right to grant and does grant on behalf of all authors of the  
13 634 Work (as defined in the below author licence), an exclusive licence and/or a non-exclusive  
14 635 licence for contributions from authors who are: i) UK Crown employees; ii) where BMJ has  
15 636 agreed a CC-BY licence shall apply, and/or iii) in accordance with the terms applicable for US  
16 637 Federal Government officers or employees acting as part of their official duties; on a  
17 638 worldwide, perpetual, irrevocable, royalty-free basis to BMJ Publishing Group Ltd (“BMJ”)  
18 639 its licensees and where the relevant Journal is co-owned by BMJ to the co-owners of the  
19 640 Journal, to publish the Work in BMJ Open and any other BMJ products and to exploit all rights,  
20 641 as set out in our licence.  
21  
22 642  
23  
24  
25  
26  
27  
28  
29  
30  
31  
32  
33  
34  
35  
36  
37  
38  
39  
40  
41  
42  
43  
44  
45  
46  
47  
48  
49  
50  
51  
52  
53  
54  
55  
56  
57  
58  
59  
60

I, the Submitting Author has the right to grant and does grant on behalf of all authors of the Work (as defined in the below author licence), an exclusive licence and/or a non-exclusive licence for contributions from authors who are: i) UK Crown employees; ii) where BMJ has agreed a CC-BY licence shall apply, and/or iii) in accordance with the terms applicable for US Federal Government officers or employees acting as part of their official duties; on a worldwide, perpetual, irrevocable, royalty-free basis to BMJ Publishing Group Ltd (“BMJ”) its licensees and where the relevant Journal is co-owned by BMJ to the co-owners of the Journal, to publish the Work in BMJ Open and any other BMJ products and to exploit all rights, as set out in our licence.

Manual for the land-based and water-based MAT (adapted from<sup>1</sup>)

1. Land-based MAT

|                                                               |                                                  |                                           |           |
|---------------------------------------------------------------|--------------------------------------------------|-------------------------------------------|-----------|
| <b>Standing balance</b>                                       |                                                  |                                           | <b>SB</b> |
| <i>Participants perform various exercises while standing.</i> |                                                  |                                           |           |
| Progression: BOS                                              | Progression: Catching & Throwing                 | Progression: Tools                        |           |
| Narrow BOS                                                    | Alone                                            | Number of objects for throwing            |           |
| Semi-tandem stance                                            | With partner                                     | Kind of objects (small sacks, balls, ...) |           |
| Tandem stance                                                 |                                                  |                                           |           |
| One leg stance (+movements of opposite leg)                   |                                                  |                                           |           |
| Half kneeling                                                 |                                                  |                                           |           |
| Sensory modification                                          | Visual: closed eyes                              |                                           |           |
|                                                               | Somatosensory: various unstable support surfaces |                                           |           |
|                                                               | Vestibular: head turns (horizontal, vertical)    |                                           |           |
| Cognitive add-on                                              | -                                                |                                           |           |

|                                                                                                                                                               |                                                  |  |           |
|---------------------------------------------------------------------------------------------------------------------------------------------------------------|--------------------------------------------------|--|-----------|
| <b>"Chaosball"</b>                                                                                                                                            |                                                  |  | <b>SB</b> |
| <i>An object (e.g. ball) is passed in a group in a certain sequence, participants follow the sequence and recall certain attributes of the group members.</i> |                                                  |  |           |
| Progression: Number of sequences/objects                                                                                                                      |                                                  |  |           |
| 1 sequence (= 1 object)                                                                                                                                       |                                                  |  |           |
| Switching: 2 sequences (= 2 objects)                                                                                                                          |                                                  |  |           |
| Simultaneously: 2 sequences (= 2 objects)                                                                                                                     |                                                  |  |           |
| Simultaneously: 3 sequences (= 3 objects)                                                                                                                     |                                                  |  |           |
| Sensory modification                                                                                                                                          | Visual: -                                        |  |           |
|                                                                                                                                                               | Somatosensory: various unstable support surfaces |  |           |
|                                                                                                                                                               | Vestibular: -                                    |  |           |
| Cognitive add-on (main focus)                                                                                                                                 | Memory: Recall orders                            |  |           |
|                                                                                                                                                               | Divided attention: more than one object          |  |           |

|                                                        |                                                                                                   |                                |           |
|--------------------------------------------------------|---------------------------------------------------------------------------------------------------|--------------------------------|-----------|
| <b>Balancing on lines</b>                              |                                                                                                   |                                | <b>DB</b> |
| <i>Participants follow the lines on the gym floor.</i> |                                                                                                   |                                |           |
| Progression: BOS, DOM                                  | Progression: Movement                                                                             | Progression: Speed of movement |           |
| Narrow gait                                            | High knees                                                                                        | Slow swing phase (e.g., 3s)    |           |
| Tandem gait                                            | Lunges                                                                                            |                                |           |
| Forwards, backwards                                    |                                                                                                   |                                |           |
| Sensory modification                                   | Visual: Perform several steps with eyes closed                                                    |                                |           |
|                                                        | Somatosensory: -                                                                                  |                                |           |
|                                                        | Vestibular: Upper body & head turns                                                               |                                |           |
| Cognitive add-on                                       | Double-task: Pairs of two, trailing partner gives commands for stops or turns for leading partner |                                |           |
|                                                        | Double-task: Pairs of two, trailing partner has to move synchronously with leading partner        |                                |           |

|                                                     |                                                         |                      |           |
|-----------------------------------------------------|---------------------------------------------------------|----------------------|-----------|
| <b>Stepping</b>                                     |                                                         |                      | <b>DB</b> |
| <i>Participants perform various forms of steps.</i> |                                                         |                      |           |
| Progression: DOM                                    | Progression: Movement                                   | Progression: Tools   |           |
| Forwards, backwards, sideways                       | High knees                                              | Stepping out of hoop |           |
| Combination of directions                           | Lunges                                                  |                      |           |
|                                                     | Floor "touches"                                         |                      |           |
| Sensory modification                                | Visual: closed eyes                                     |                      |           |
|                                                     | Somatosensory: Various unstable support surfaces        |                      |           |
|                                                     | Vestibular: Head turns (horizontal, vertical, diagonal) |                      |           |
| Cognitive add-on                                    | Memory: Each direction gets a number (e.g. front = 1)   |                      |           |

|                                                                                                                             |                                                  |                                           |           |
|-----------------------------------------------------------------------------------------------------------------------------|--------------------------------------------------|-------------------------------------------|-----------|
| <b>"Transport chain"</b>                                                                                                    |                                                  |                                           | <b>DB</b> |
| <i>Over 5-10m each participant follows a line, but after each collective step an object is "transported" (e.g. thrown).</i> |                                                  |                                           |           |
| Progression: BOS, DOM                                                                                                       | Progression: Movement                            | Progression: Tools                        |           |
| Narrow gait                                                                                                                 | High knees                                       | Number of tools to be thrown              |           |
| Tandem gait                                                                                                                 | Lunges                                           | Kind of objects (small sacks, balls, ...) |           |
| forwards, backwards                                                                                                         |                                                  |                                           |           |
| Sensory modification                                                                                                        | Visual: -                                        |                                           |           |
|                                                                                                                             | Somatosensory: -                                 |                                           |           |
|                                                                                                                             | Vestibular: Upper body & head turns (horizontal) |                                           |           |
| Cognitive add-on                                                                                                            | -                                                |                                           |           |

|                                                                                                                                                       |                                                                                              |                                 |           |
|-------------------------------------------------------------------------------------------------------------------------------------------------------|----------------------------------------------------------------------------------------------|---------------------------------|-----------|
| <b>"Commander"</b>                                                                                                                                    |                                                                                              |                                 | <b>DB</b> |
| <i>Pairs of two: one participant has to react to the commands of the other. Commands are different combinations of a step and simultaneous catch.</i> |                                                                                              |                                 |           |
| Progression: Movement                                                                                                                                 | Progression: Starting position                                                               | Progression: Number of commands |           |
| Tasks for one side of body                                                                                                                            | On the floor                                                                                 | 2 to 8                          |           |
| Tasks for both sides of body (e.g. step left, catch right)                                                                                            | On the floor but inside a hoop                                                               |                                 |           |
|                                                                                                                                                       | On unstable support surface                                                                  |                                 |           |
|                                                                                                                                                       | 180° turn before step and catch                                                              |                                 |           |
| Sensory modification                                                                                                                                  | Visual: closed eyes (starting position)                                                      |                                 |           |
|                                                                                                                                                       | Somatosensory: Various unstable support surfaces (starting position)                         |                                 |           |
|                                                                                                                                                       | Vestibular: 180° turns before catch                                                          |                                 |           |
| Cognitive add-on (main focus)                                                                                                                         | Memory: Recall pairs (movement+number / movement+color word / movement+number or color word) |                                 |           |
|                                                                                                                                                       | Inhibition: command = stay in place                                                          |                                 |           |
|                                                                                                                                                       | Reaction: commander minimizes time to react                                                  |                                 |           |

|    |                                                                                                                                                              |                                                                                              |                                                  |    |
|----|--------------------------------------------------------------------------------------------------------------------------------------------------------------|----------------------------------------------------------------------------------------------|--------------------------------------------------|----|
| 1  | <b>"Movement memory"</b>                                                                                                                                     |                                                                                              |                                                  | DB |
| 2  | <i>Participants move through the gym while performing gait variations coded with various commands given by therapist.</i>                                    |                                                                                              |                                                  |    |
| 3  | Progression: Movement                                                                                                                                        | Progression: Number of pairs                                                                 |                                                  |    |
| 4  | Tasks for one side of body                                                                                                                                   | 4 to 8                                                                                       |                                                  |    |
| 5  | Tasks for both sides of body (e.g. left knee up & right hand to left shoulder)                                                                               |                                                                                              |                                                  |    |
| 6  | Similarity of movements                                                                                                                                      |                                                                                              |                                                  |    |
| 7  | Sensory modification                                                                                                                                         | Visual: -                                                                                    |                                                  |    |
| 8  |                                                                                                                                                              | Somatosensory: -                                                                             |                                                  |    |
| 9  |                                                                                                                                                              | Vestibular: -                                                                                |                                                  |    |
| 10 | Cognitive add-on (main focus)                                                                                                                                | Memory: Recall pairs (movement+number / movement+color word / movement+number or color word) |                                                  |    |
| 11 |                                                                                                                                                              | Inhibition: command = stop                                                                   |                                                  |    |
| 12 | <b>"Remote control"</b>                                                                                                                                      |                                                                                              |                                                  | DB |
| 13 | <i>Pairs of two: a participant is steered through the room with closed eyes via tactile cues of the partner.</i>                                             |                                                                                              |                                                  |    |
| 14 | Progression: number of cues                                                                                                                                  | Progression: movement                                                                        |                                                  |    |
| 15 | 3 to 6                                                                                                                                                       | Tandem walk, high knees                                                                      |                                                  |    |
| 16 | Sensory modification                                                                                                                                         | Visual: closed eyes                                                                          |                                                  |    |
| 17 |                                                                                                                                                              | Somatosensory: -                                                                             |                                                  |    |
| 18 |                                                                                                                                                              | Vestibular: turning in place                                                                 |                                                  |    |
| 19 | Cognitive add-on                                                                                                                                             | Spatial orientation: report location in space to partner (closed eyes)                       |                                                  |    |
| 20 | <b>Walking with tasks</b>                                                                                                                                    |                                                                                              |                                                  | AG |
| 21 | <i>Each participant performs various tasks (e.g. touch opposite knee while throwing an object left to right) while walking back and forth on a 20m lane.</i> |                                                                                              |                                                  |    |
| 22 | Progression: DOM, speed                                                                                                                                      | Progression: movement                                                                        | Progression: tools                               |    |
| 23 | Forwards, backwards, sideways                                                                                                                                | Tasks for one side of body                                                                   | Kind of objects (small sacks, balls, ...)        |    |
| 24 | walking, jogging                                                                                                                                             | Tasks for both sides of body (e.g. left knee, right hand)                                    |                                                  |    |
| 25 | Sensory modification                                                                                                                                         | Visual: -                                                                                    |                                                  |    |
| 26 |                                                                                                                                                              | Somatosensory: -                                                                             |                                                  |    |
| 27 |                                                                                                                                                              | Vestibular: Head turns (horizontal)                                                          |                                                  |    |
| 28 | Cognitive add-on                                                                                                                                             | -                                                                                            |                                                  |    |
| 29 | <b>Agility ladder</b>                                                                                                                                        |                                                                                              |                                                  | AG |
| 30 | <i>Participants perform exercises in an agility ladder on the floor. Number and type of foot contacts in each field are varied.</i>                          |                                                                                              |                                                  |    |
| 31 | Progression: DOM, speed                                                                                                                                      | Progression: complexity                                                                      | Progression: tools                               |    |
| 32 | Forwards, backwards, sideways                                                                                                                                | Easier sequences (2 / 3 touches)                                                             | Kind of objects (small sacks, balls, ...)        |    |
| 33 |                                                                                                                                                              | Harder sequences (1,2,3,2,1 / 2 forwards 1 back / 2 in 1 out)                                |                                                  |    |
| 34 | Sensory modification                                                                                                                                         | Visual: -                                                                                    |                                                  |    |
| 35 |                                                                                                                                                              | Somatosensory: -                                                                             |                                                  |    |
| 36 |                                                                                                                                                              | Vestibular: Head turns                                                                       |                                                  |    |
| 37 | Cognitive add-on                                                                                                                                             | Divided attention: Participants have to call numbers shown by therapist                      |                                                  |    |
| 38 |                                                                                                                                                              | Divided attention: Participants have to catch objects thrown by therapist                    |                                                  |    |
| 39 | <b>Cone tipping</b>                                                                                                                                          |                                                                                              |                                                  | AG |
| 40 | <i>Pairs of two: one participant starts surrounded by an assemble of cones. The partner outside of the cones says which cones have to be touched.</i>        |                                                                                              |                                                  |    |
| 41 | Progression: speed, duration                                                                                                                                 | Progression: number of cones                                                                 |                                                  |    |
| 42 | Walking, jogging                                                                                                                                             | 4 to 8                                                                                       |                                                  |    |
| 43 | 1 round = 30s                                                                                                                                                |                                                                                              |                                                  |    |
| 44 | Sensory modification                                                                                                                                         | Visual: -                                                                                    |                                                  |    |
| 45 |                                                                                                                                                              | Somatosensory: -                                                                             |                                                  |    |
| 46 |                                                                                                                                                              | Vestibular: -                                                                                |                                                  |    |
| 47 | Cognitive add-on                                                                                                                                             | Spatial orientation & memory: directions are given by numbers, colors or alphabet            |                                                  |    |
| 48 | <b>Slalom</b>                                                                                                                                                |                                                                                              |                                                  | AG |
| 49 | <i>Participants move through a slalom parcour.</i>                                                                                                           |                                                                                              |                                                  |    |
| 50 | Progression: speed, duration                                                                                                                                 | Progression: number of obstacles                                                             | Progression: competition                         |    |
| 51 | Walking, jogging                                                                                                                                             | 4 to 8                                                                                       | Hit a target with an object at the end of slalom |    |
| 52 | 1 round = 60-90s                                                                                                                                             |                                                                                              |                                                  |    |
| 53 | Sensory modification                                                                                                                                         | Visual: -                                                                                    |                                                  |    |
| 54 |                                                                                                                                                              | Somatosensory: -                                                                             |                                                  |    |
| 55 |                                                                                                                                                              | Vestibular: -                                                                                |                                                  |    |
| 56 | Cognitive add-on                                                                                                                                             | -                                                                                            |                                                  |    |
| 57 | <b>Soccer</b>                                                                                                                                                |                                                                                              |                                                  | AG |
| 58 | <i>Participants move and pass a ball.</i>                                                                                                                    |                                                                                              |                                                  |    |
| 59 | Progression: speed, duration                                                                                                                                 | Progression: number of players                                                               | Progression: change of direction                 |    |
| 60 | Walking, jogging                                                                                                                                             | 1 to 4                                                                                       | Front - back                                     |    |
| 61 | 1 round = 60-90s                                                                                                                                             | Front - back and sideways                                                                    |                                                  |    |
| 62 |                                                                                                                                                              | Random                                                                                       |                                                  |    |
| 63 | Sensory modification                                                                                                                                         | Visual: -                                                                                    |                                                  |    |
| 64 |                                                                                                                                                              | Somatosensory: -                                                                             |                                                  |    |
| 65 |                                                                                                                                                              | Vestibular: -                                                                                |                                                  |    |
| 66 | Cognitive add-on                                                                                                                                             | Attention: participants have to react to stop and change of direction signals by therapist   |                                                  |    |

|                                                                                                                                           |                                           |                                        |           |
|-------------------------------------------------------------------------------------------------------------------------------------------|-------------------------------------------|----------------------------------------|-----------|
| <b>"Suicide runs"</b>                                                                                                                     |                                           |                                        | <b>AG</b> |
| <i>The length of the gym is split into 3 sections. Participants cover each section in different speeds, accelerating and decelerating</i> |                                           |                                        |           |
| Progression: speed, duration                                                                                                              | Progression: Stops at end of section      | Progression: competition               |           |
| Walking, jogging                                                                                                                          | touch a cone                              | Hit a target with an object at the end |           |
| 1 round = 45-90s                                                                                                                          | circle a cone                             |                                        |           |
|                                                                                                                                           | stop - 2 steps back - accelerate forwards |                                        |           |
| Sensory modification                                                                                                                      | Visual: -                                 |                                        |           |
|                                                                                                                                           | Somatosensory: -                          |                                        |           |
|                                                                                                                                           | Vestibular: -                             |                                        |           |
| Cognitive add-on                                                                                                                          | -                                         |                                        |           |

## 2. Water-based MAT

|                                                                           |                                               |                    |           |
|---------------------------------------------------------------------------|-----------------------------------------------|--------------------|-----------|
| <b>Standing balance</b>                                                   |                                               |                    | <b>SB</b> |
| <i>Participants perform various exercises while standing in the pool.</i> |                                               |                    |           |
| Progression: BOS                                                          | Progression: free leg                         | Progression: hands |           |
| Narrow BOS                                                                | Floor "touches"                               | Inside water       |           |
| Semi-tandem stance                                                        | Leg swings                                    | Outside water      |           |
| Tandem stance                                                             | Number, amplitude, direction of swings        |                    |           |
| One leg stance (+movements of free leg)                                   |                                               |                    |           |
| Sensory modification                                                      | Visual: closed eyes                           |                    |           |
|                                                                           | Somatosensory: standing on kickboard          |                    |           |
|                                                                           | Vestibular: head turns (horizontal, vertical) |                    |           |
| Cognitive add-on                                                          | -                                             |                    |           |

|                                                                 |                                                         |                    |           |
|-----------------------------------------------------------------|---------------------------------------------------------|--------------------|-----------|
| <b>Gait and jump variations</b>                                 |                                                         |                    | <b>DB</b> |
| <i>Participants perform gait and jump variations in a lane.</i> |                                                         |                    |           |
| Progression: BOS, DOM                                           | Progression: movement                                   | Progression: hands |           |
| Narrow gait                                                     | High knees                                              | Inside water       |           |
| Tandem gait                                                     | Lunges                                                  | Outside water      |           |
| Forwards, backwards, sideways                                   | Hot steps, skipping gait                                |                    |           |
|                                                                 | Single-leg, two-legged jumps, hold landing position 3s  |                    |           |
|                                                                 | jumping jack                                            |                    |           |
| Sensory modification                                            | Visual: closed eyes                                     |                    |           |
|                                                                 | Somatosensory: walking with feet on 1-2 kickboard(s)    |                    |           |
|                                                                 | Vestibular: head turns (horizontal, vertical, diagonal) |                    |           |
| Cognitive add-on                                                | Memory: 4 variations of jumping jack                    |                    |           |

|                                                                                                                             |                                                                                              |  |           |
|-----------------------------------------------------------------------------------------------------------------------------|----------------------------------------------------------------------------------------------|--|-----------|
| <b>"Movement memory"</b>                                                                                                    |                                                                                              |  | <b>DB</b> |
| <i>Participants move through the water while performing gait variations coded with various commands given by therapist.</i> |                                                                                              |  |           |
| Progression: movement                                                                                                       | Progression: number of pairs                                                                 |  |           |
| Only legs/only arms                                                                                                         | 4 to 8                                                                                       |  |           |
| Combination of arms + legs, one-side of body                                                                                |                                                                                              |  |           |
| Combination of arms + legs, both sides of body                                                                              |                                                                                              |  |           |
| Similarity of movements                                                                                                     |                                                                                              |  |           |
| Sensory modification                                                                                                        | Visual: -                                                                                    |  |           |
|                                                                                                                             | Somatosensory: -                                                                             |  |           |
|                                                                                                                             | Vestibular: -                                                                                |  |           |
| Cognitive add-on (main focus)                                                                                               | Memory: recall pairs (movement+number / movement+color word / movement+number or color word) |  |           |
|                                                                                                                             | Inhibition: command = stop                                                                   |  |           |

|                                                                                                                                                       |                                                                                          |                                 |           |
|-------------------------------------------------------------------------------------------------------------------------------------------------------|------------------------------------------------------------------------------------------|---------------------------------|-----------|
| <b>"Commander"</b>                                                                                                                                    |                                                                                          |                                 | <b>DB</b> |
| <i>Pairs of two. One participant must respond to the commands of the partner. The commands consist of different combinations of a catch and step.</i> |                                                                                          |                                 |           |
| Progression: movement                                                                                                                                 | Progression: starting position                                                           | Progression: number of commands |           |
| Catch/step = same side of body                                                                                                                        | Floor                                                                                    | 2 to 8                          |           |
| Catch/step = diagonal                                                                                                                                 | standing on kickboard                                                                    |                                 |           |
|                                                                                                                                                       | 180° turns before catching                                                               |                                 |           |
| Sensory modifications                                                                                                                                 | Visual: starting position with closed eyes                                               |                                 |           |
|                                                                                                                                                       | Somatosensory: kickboard (starting position)                                             |                                 |           |
|                                                                                                                                                       | Vestibular: 180° turns (starting position)                                               |                                 |           |
| Cognitive add-on (main focus)                                                                                                                         | Memory: recall pairs (movement + number / movement + color / movement + number or color) |                                 |           |
|                                                                                                                                                       | Inhibition: command = stop                                                               |                                 |           |
|                                                                                                                                                       | Reaction: reduce response time                                                           |                                 |           |

|                                                                                                           |                  |  |           |
|-----------------------------------------------------------------------------------------------------------|------------------|--|-----------|
| <b>"Circuit Training"</b>                                                                                 |                  |  | <b>DB</b> |
| <i>Participants complete a circuit as pairs, consisting of various functional leg strength exercises.</i> |                  |  |           |
| Progression: duration, speed                                                                              |                  |  |           |
| 45-60s per exercise, 2-3 rounds, 3-4 exercises per round                                                  |                  |  |           |
| Exercises include: running, swimming, jumping, step-ups                                                   |                  |  |           |
| Sensory modifications                                                                                     | Visual: -        |  |           |
|                                                                                                           | Somatosensory: - |  |           |
|                                                                                                           | Vestibular: -    |  |           |
| Cognitive add-on                                                                                          | -                |  |           |

|                                                                                                                                                                      |                                                                                                                                                                                                                                                                                                                                                           |              |
|----------------------------------------------------------------------------------------------------------------------------------------------------------------------|-----------------------------------------------------------------------------------------------------------------------------------------------------------------------------------------------------------------------------------------------------------------------------------------------------------------------------------------------------------|--------------|
| <b>"Chaosball"</b>                                                                                                                                                   |                                                                                                                                                                                                                                                                                                                                                           | <b>SB/AG</b> |
| <i>Participants stand in a circle and throw a ball to each other in a certain order. Various attributes of other participants must be remembered in the process.</i> |                                                                                                                                                                                                                                                                                                                                                           |              |
| Progression: number of orders / objects                                                                                                                              |                                                                                                                                                                                                                                                                                                                                                           |              |
| 1 order (= 1 object)                                                                                                                                                 |                                                                                                                                                                                                                                                                                                                                                           |              |
| Change: 2 orders (= 2 objects)                                                                                                                                       |                                                                                                                                                                                                                                                                                                                                                           |              |
| Simultaneously: 2 orders (= 2 objects)                                                                                                                               |                                                                                                                                                                                                                                                                                                                                                           |              |
| Simultaneously: 3 orders (= 3 objects)                                                                                                                               |                                                                                                                                                                                                                                                                                                                                                           |              |
| Sensory modifications                                                                                                                                                | Visual: -<br>Somatosensory: -<br>Vestibular: -                                                                                                                                                                                                                                                                                                            |              |
| Cognitive add-on (main focus)                                                                                                                                        | Memory: recall orders<br>Divided attention: more than one object<br>Spatial orientation: comply with order, while participants no longer stand in a circle, but walk/run around in the pool                                                                                                                                                               |              |
| <b>"Waiter"</b>                                                                                                                                                      |                                                                                                                                                                                                                                                                                                                                                           | <b>AG</b>    |
| <i>Participants balance a ball on a kickboard and simultaneously perform different exercises.</i>                                                                    |                                                                                                                                                                                                                                                                                                                                                           |              |
| Progression: DOM, speed                                                                                                                                              | Progression: movement                                                                                                                                                                                                                                                                                                                                     |              |
| Walk, jog                                                                                                                                                            | Balance ball, throw & catch ball                                                                                                                                                                                                                                                                                                                          |              |
| Forwards, backwards, turns                                                                                                                                           | Change hands on kickboard<br>Throw & catch ball while changing hands                                                                                                                                                                                                                                                                                      |              |
| Sensory modification                                                                                                                                                 | Visual: Move eyes away from ball<br>Somatosensory: -<br>Vestibular: throw & catch with 180°/360° turns                                                                                                                                                                                                                                                    |              |
| Cognitive add-on (main focus)                                                                                                                                        | Dual-task: walk/jog & balance ball & react to commands from therapist<br>Divided attention: balance ball while commands given by therapist include hand signs<br>Memory: commands from therapist are given via numbers or via a mix of numbers, hand signs, and/or clapping<br>Processing speed: react as fast as possible to commands given by therapist |              |
| <b>"Compass"</b>                                                                                                                                                     |                                                                                                                                                                                                                                                                                                                                                           | <b>AG</b>    |
| <i>Participants move in the directions given by therapist.</i>                                                                                                       |                                                                                                                                                                                                                                                                                                                                                           |              |
| Progression: speed, duration                                                                                                                                         | Progression: number of directions                                                                                                                                                                                                                                                                                                                         |              |
| Walking, jogging                                                                                                                                                     | 4 to 8 (front, back, side, diagonal)                                                                                                                                                                                                                                                                                                                      |              |
| 1 round = 45-60s                                                                                                                                                     |                                                                                                                                                                                                                                                                                                                                                           |              |
| Sensory modification                                                                                                                                                 | Visual: -<br>Somatosensory: -<br>Vestibular: -                                                                                                                                                                                                                                                                                                            |              |
| Cognitive add-on                                                                                                                                                     | Memory: recall pairs (direction+number / direction+color word)<br>Inhibition: therapist gives false cues<br>Processing speed: react as fast as possible to commands                                                                                                                                                                                       |              |
| <b>"Mirror"</b>                                                                                                                                                      |                                                                                                                                                                                                                                                                                                                                                           | <b>AG</b>    |
| <i>Pairs of two. One participant leads, the other follows while always keeping the same distance.</i>                                                                |                                                                                                                                                                                                                                                                                                                                                           |              |
| Progression: speed, duration                                                                                                                                         | Progression: fakes                                                                                                                                                                                                                                                                                                                                        |              |
| Walking, jogging, competition (shake off)                                                                                                                            | Leader fakes change of direction<br>Leader changes speeds                                                                                                                                                                                                                                                                                                 |              |
| 45-60sec.                                                                                                                                                            |                                                                                                                                                                                                                                                                                                                                                           |              |
| Sensory modification                                                                                                                                                 | Visual: -<br>Somatosensory: -<br>Vestibular: -                                                                                                                                                                                                                                                                                                            |              |
| Cognitive add-on                                                                                                                                                     | -                                                                                                                                                                                                                                                                                                                                                         |              |
| <b>"Beachball"</b>                                                                                                                                                   |                                                                                                                                                                                                                                                                                                                                                           | <b>AG</b>    |
| <i>Participants play with a beachball.</i>                                                                                                                           |                                                                                                                                                                                                                                                                                                                                                           |              |
| Progression: number of players                                                                                                                                       |                                                                                                                                                                                                                                                                                                                                                           |              |
| 2 to whole group                                                                                                                                                     |                                                                                                                                                                                                                                                                                                                                                           |              |
| Sensory modification                                                                                                                                                 | Visual: -<br>Somatosensory: standing on kickboard<br>Vestibular: -                                                                                                                                                                                                                                                                                        |              |
| Cognitive add-on                                                                                                                                                     | -                                                                                                                                                                                                                                                                                                                                                         |              |

MAT = multimodal agility-based exercise training; BOS = Base of support; DOM = Direction of movement

## Components

- SB = Standing balance
- DB = Dynamic balance & functional leg strength
- AG = Agility

Each bracket represents a module. Each module targets one of the three components.

1. Callesen J, Cattaneo D, Brincks J, et al. How do resistance training and balance and motor control training affect gait performance and fatigue impact in people with multiple sclerosis? A randomized controlled multi-center study. *Mult Scler* 2020;26(11):1420-32. doi: 10.1177/1352458519865740 [published Online First: 20190724]

For peer review only

**ReFEx Strength Protocol**

|                                                                                                                                                                            |                                                                                                                             |                                                                                                                                                                                                   |  |
|----------------------------------------------------------------------------------------------------------------------------------------------------------------------------|-----------------------------------------------------------------------------------------------------------------------------|---------------------------------------------------------------------------------------------------------------------------------------------------------------------------------------------------|--|
| <b>Principles:</b>                                                                                                                                                         |                                                                                                                             | <b>Intensity:</b>                                                                                                                                                                                 |  |
| <ul style="list-style-type: none"> <li>• Frequency: 3x/week</li> <li>• Focus on leg strength/no balance training</li> <li>• 5min warm-up, 3-4 exercises/session</li> </ul> |                                                                                                                             | <ul style="list-style-type: none"> <li>• Session 1-5: 3x10 repetitions at 15 RPM</li> <li>• Session 6 to T<sub>1</sub>: 3x12 repetitions at 12 RPM</li> <li>• Break between sets: 1min</li> </ul> |  |
| <b>Session-RPE:</b>                                                                                                                                                        |                                                                                                                             |                                                                                                                                                                                                   |  |
| At the end of every training the participant is requested to provide a rating on perceived exertion (i.e., session-RPE) for the complete session                           |                                                                                                                             |                                                                                                                                                                                                   |  |
| <b>Warm-up (5min):</b>                                                                                                                                                     |                                                                                                                             |                                                                                                                                                                                                   |  |
| <ul style="list-style-type: none"> <li>• Participants can choose between treadmill, cross trainer, stepper, and recumbent stepper</li> </ul>                               |                                                                                                                             |                                                                                                                                                                                                   |  |
| <b>Exercise pool:</b>                                                                                                                                                      |                                                                                                                             |                                                                                                                                                                                                   |  |
| Always determine 15RPM before starting a new exercise!                                                                                                                     |                                                                                                                             |                                                                                                                                                                                                   |  |
| <b>1 hip</b>                                                                                                                                                               |                                                                                                                             |                                                                                                                                                                                                   |  |
| a) Extension<br>Leg press (upper body upright) <ul style="list-style-type: none"> <li>• Start: hip angle as small as possible</li> </ul>                                   | b) Flexion<br>Standing knee raises (cable) <ul style="list-style-type: none"> <li>• With balance support (chair)</li> </ul> | c) Abduction<br>Standing abduction (cable) <ul style="list-style-type: none"> <li>• With balance support</li> </ul>                                                                               |  |
| <b>2 knee</b>                                                                                                                                                              |                                                                                                                             |                                                                                                                                                                                                   |  |
| a) Extension<br>Leg press (supine)                                                                                                                                         | b) Flexion<br>Prone leg curls (cable) <ul style="list-style-type: none"> <li>• End: &gt;90° flexion</li> </ul>              |                                                                                                                                                                                                   |  |
| <b>3 foot</b>                                                                                                                                                              |                                                                                                                             |                                                                                                                                                                                                   |  |
| a) Plantar flexion<br>Calf raises on leg press <ul style="list-style-type: none"> <li>• Large ankle ROM</li> </ul>                                                         |                                                                                                                             |                                                                                                                                                                                                   |  |

RPM = Repetition maximum; RPE = Rated perceived exertion; ROM = Range of motion

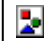

SPIRIT 2013 Checklist: Recommended items to address in a clinical trial protocol and related documents\*

| Section/item                      | Item No | Description                                                                                                                                                                                                                                                                              | Addressed on page number |
|-----------------------------------|---------|------------------------------------------------------------------------------------------------------------------------------------------------------------------------------------------------------------------------------------------------------------------------------------------|--------------------------|
| <b>Administrative information</b> |         |                                                                                                                                                                                                                                                                                          |                          |
| Title                             | 1       | Descriptive title identifying the study design, population, interventions, and, if applicable, trial acronym                                                                                                                                                                             | ___ 1 ___                |
| Trial registration                | 2a      | Trial identifier and registry name. If not yet registered, name of intended registry                                                                                                                                                                                                     | ___ 3 ___                |
|                                   | 2b      | All items from the World Health Organization Trial Registration Data Set                                                                                                                                                                                                                 | ___ n/a ___              |
| Protocol version                  | 3       | Date and version identifier                                                                                                                                                                                                                                                              | ___ n/a ___              |
| Funding                           | 4       | Sources and types of financial, material, and other support                                                                                                                                                                                                                              | ___ 24 ___               |
| Roles and responsibilities        | 5a      | Names, affiliations, and roles of protocol contributors                                                                                                                                                                                                                                  | ___ 1;24 ___             |
|                                   | 5b      | Name and contact information for the trial sponsor                                                                                                                                                                                                                                       | ___ 24 ___               |
|                                   | 5c      | Role of study sponsor and funders, if any, in study design; collection, management, analysis, and interpretation of data; writing of the report; and the decision to submit the report for publication, including whether they will have ultimate authority over any of these activities | ___ 24 ___               |
|                                   | 5d      | Composition, roles, and responsibilities of the coordinating centre, steering committee, endpoint adjudication committee, data management team, and other individuals or groups overseeing the trial, if applicable (see Item 21a for data monitoring committee)                         | ___ n/a ___              |



|    |                                                           |     |                                                                                                               |             |
|----|-----------------------------------------------------------|-----|---------------------------------------------------------------------------------------------------------------|-------------|
| 1  | <b>Introduction</b>                                       |     |                                                                                                               |             |
| 2  |                                                           |     |                                                                                                               |             |
| 3  | Background and                                            | 6a  | Description of research question and justification for undertaking the trial, including summary of relevant   | ___3-5___   |
| 4  | rationale                                                 |     | studies (published and unpublished) examining benefits and harms for each intervention                        |             |
| 5  |                                                           |     |                                                                                                               |             |
| 6  |                                                           | 6b  | Explanation for choice of comparators                                                                         | ___5___     |
| 7  |                                                           |     |                                                                                                               |             |
| 8  | Objectives                                                | 7   | Specific objectives or hypotheses                                                                             | ___5___     |
| 9  |                                                           |     |                                                                                                               |             |
| 10 | Trial design                                              | 8   | Description of trial design including type of trial (eg, parallel group, crossover, factorial, single group), |             |
| 11 |                                                           |     | allocation ratio, and framework (eg, superiority, equivalence, noninferiority, exploratory)                   | ___5;8___   |
| 12 |                                                           |     |                                                                                                               |             |
| 13 |                                                           |     |                                                                                                               |             |
| 14 | <b>Methods: Participants, interventions, and outcomes</b> |     |                                                                                                               |             |
| 15 |                                                           |     |                                                                                                               |             |
| 16 | Study setting                                             | 9   | Description of study settings (eg, community clinic, academic hospital) and list of countries where data will | ___6___     |
| 17 |                                                           |     | be collected. Reference to where list of study sites can be obtained                                          |             |
| 18 |                                                           |     |                                                                                                               |             |
| 19 | Eligibility criteria                                      | 10  | Inclusion and exclusion criteria for participants. If applicable, eligibility criteria for study centres and  | ___9-10___  |
| 20 |                                                           |     | individuals who will perform the interventions (eg, surgeons, psychotherapists)                               |             |
| 21 |                                                           |     |                                                                                                               |             |
| 22 | Interventions                                             | 11a | Interventions for each group with sufficient detail to allow replication, including how and when they will be | ___10-13___ |
| 23 |                                                           |     | administered                                                                                                  |             |
| 24 |                                                           |     |                                                                                                               |             |
| 25 |                                                           | 11b | Criteria for discontinuing or modifying allocated interventions for a given trial participant (eg, drug dose  | ___11-13___ |
| 26 |                                                           |     | change in response to harms, participant request, or improving/worsening disease)                             |             |
| 27 |                                                           |     |                                                                                                               |             |
| 28 |                                                           | 11c | Strategies to improve adherence to intervention protocols, and any procedures for monitoring adherence        | ___15-16___ |
| 29 |                                                           |     | (eg, drug tablet return, laboratory tests)                                                                    |             |
| 30 |                                                           |     |                                                                                                               |             |
| 31 |                                                           | 11d | Relevant concomitant care and interventions that are permitted or prohibited during the trial                 | ___10-11___ |
| 32 |                                                           |     |                                                                                                               |             |
| 33 | Outcomes                                                  | 12  | Primary, secondary, and other outcomes, including the specific measurement variable (eg, systolic blood       | ___14-20___ |
| 34 |                                                           |     | pressure), analysis metric (eg, change from baseline, final value, time to event), method of aggregation (eg, |             |
| 35 |                                                           |     | median, proportion), and time point for each outcome. Explanation of the clinical relevance of chosen         |             |
| 36 |                                                           |     | efficacy and harm outcomes is strongly recommended                                                            |             |
| 37 |                                                           |     |                                                                                                               |             |
| 38 | Participant timeline                                      | 13  | Time schedule of enrolment, interventions (including any run-ins and washouts), assessments, and visits for   | ___6-8___   |
| 39 |                                                           |     | participants. A schematic diagram is highly recommended (see Figure)                                          |             |
| 40 |                                                           |     |                                                                                                               |             |
| 41 |                                                           |     |                                                                                                               |             |
| 42 |                                                           |     |                                                                                                               |             |
| 43 |                                                           |     |                                                                                                               |             |
| 44 |                                                           |     |                                                                                                               |             |
| 45 |                                                           |     |                                                                                                               |             |
| 46 |                                                           |     |                                                                                                               |             |

|   |             |    |                                                                                                                                                                                       |           |
|---|-------------|----|---------------------------------------------------------------------------------------------------------------------------------------------------------------------------------------|-----------|
| 1 | Sample size | 14 | Estimated number of participants needed to achieve study objectives and how it was determined, including clinical and statistical assumptions supporting any sample size calculations | ___8-9___ |
| 2 |             |    |                                                                                                                                                                                       |           |
| 3 |             |    |                                                                                                                                                                                       |           |
| 4 | Recruitment | 15 | Strategies for achieving adequate participant enrolment to reach target sample size                                                                                                   | ___8___   |
| 5 |             |    |                                                                                                                                                                                       |           |

### 6 **Methods: Assignment of interventions (for controlled trials)**

#### 7 Allocation:

|    |                                  |     |                                                                                                                                                                                                                                                                                                                                                          |           |
|----|----------------------------------|-----|----------------------------------------------------------------------------------------------------------------------------------------------------------------------------------------------------------------------------------------------------------------------------------------------------------------------------------------------------------|-----------|
| 8  |                                  |     |                                                                                                                                                                                                                                                                                                                                                          |           |
| 9  |                                  |     |                                                                                                                                                                                                                                                                                                                                                          |           |
| 10 | Sequence generation              | 16a | Method of generating the allocation sequence (eg, computer-generated random numbers), and list of any factors for stratification. To reduce predictability of a random sequence, details of any planned restriction (eg, blocking) should be provided in a separate document that is unavailable to those who enrol participants or assign interventions | ___8___   |
| 11 |                                  |     |                                                                                                                                                                                                                                                                                                                                                          |           |
| 12 |                                  |     |                                                                                                                                                                                                                                                                                                                                                          |           |
| 13 |                                  |     |                                                                                                                                                                                                                                                                                                                                                          |           |
| 14 |                                  |     |                                                                                                                                                                                                                                                                                                                                                          |           |
| 15 |                                  |     |                                                                                                                                                                                                                                                                                                                                                          |           |
| 16 | Allocation concealment mechanism | 16b | Mechanism of implementing the allocation sequence (eg, central telephone; sequentially numbered, opaque, sealed envelopes), describing any steps to conceal the sequence until interventions are assigned                                                                                                                                                | ___8___   |
| 17 |                                  |     |                                                                                                                                                                                                                                                                                                                                                          |           |
| 18 |                                  |     |                                                                                                                                                                                                                                                                                                                                                          |           |
| 19 |                                  |     |                                                                                                                                                                                                                                                                                                                                                          |           |
| 20 |                                  |     |                                                                                                                                                                                                                                                                                                                                                          |           |
| 21 | Implementation                   | 16c | Who will generate the allocation sequence, who will enrol participants, and who will assign participants to interventions                                                                                                                                                                                                                                | ___8___   |
| 22 |                                  |     |                                                                                                                                                                                                                                                                                                                                                          |           |
| 23 |                                  |     |                                                                                                                                                                                                                                                                                                                                                          |           |
| 24 | Blinding (masking)               | 17a | Who will be blinded after assignment to interventions (eg, trial participants, care providers, outcome assessors, data analysts), and how                                                                                                                                                                                                                | ___13___  |
| 25 |                                  |     |                                                                                                                                                                                                                                                                                                                                                          |           |
| 26 |                                  |     |                                                                                                                                                                                                                                                                                                                                                          |           |
| 27 |                                  | 17b | If blinded, circumstances under which unblinding is permissible, and procedure for revealing a participant's allocated intervention during the trial                                                                                                                                                                                                     | ___n/a___ |
| 28 |                                  |     |                                                                                                                                                                                                                                                                                                                                                          |           |
| 29 |                                  |     |                                                                                                                                                                                                                                                                                                                                                          |           |
| 30 |                                  |     |                                                                                                                                                                                                                                                                                                                                                          |           |

### 31 **Methods: Data collection, management, and analysis**

|    |                         |     |                                                                                                                                                                                                                                                                                                                                                                                                              |             |
|----|-------------------------|-----|--------------------------------------------------------------------------------------------------------------------------------------------------------------------------------------------------------------------------------------------------------------------------------------------------------------------------------------------------------------------------------------------------------------|-------------|
| 32 |                         |     |                                                                                                                                                                                                                                                                                                                                                                                                              |             |
| 33 | Data collection methods | 18a | Plans for assessment and collection of outcome, baseline, and other trial data, including any related processes to promote data quality (eg, duplicate measurements, training of assessors) and a description of study instruments (eg, questionnaires, laboratory tests) along with their reliability and validity, if known. Reference to where data collection forms can be found, if not in the protocol | ___14-20___ |
| 34 |                         |     |                                                                                                                                                                                                                                                                                                                                                                                                              |             |
| 35 |                         |     |                                                                                                                                                                                                                                                                                                                                                                                                              |             |
| 36 |                         |     |                                                                                                                                                                                                                                                                                                                                                                                                              |             |
| 37 |                         |     |                                                                                                                                                                                                                                                                                                                                                                                                              |             |
| 38 |                         |     |                                                                                                                                                                                                                                                                                                                                                                                                              |             |
| 39 |                         | 18b | Plans to promote participant retention and complete follow-up, including list of any outcome data to be collected for participants who discontinue or deviate from intervention protocols                                                                                                                                                                                                                    | ___15-17___ |
| 40 |                         |     |                                                                                                                                                                                                                                                                                                                                                                                                              |             |
| 41 |                         |     |                                                                                                                                                                                                                                                                                                                                                                                                              |             |
| 42 |                         |     |                                                                                                                                                                                                                                                                                                                                                                                                              |             |

|    |                                 |     |                                                                                                                                                                                                                                                                                                                                       |                 |
|----|---------------------------------|-----|---------------------------------------------------------------------------------------------------------------------------------------------------------------------------------------------------------------------------------------------------------------------------------------------------------------------------------------|-----------------|
| 1  | Data management                 | 19  | Plans for data entry, coding, security, and storage, including any related processes to promote data quality (eg, double data entry; range checks for data values). Reference to where details of data management procedures can be found, if not in the protocol                                                                     | _____22_____    |
| 2  |                                 |     |                                                                                                                                                                                                                                                                                                                                       |                 |
| 3  |                                 |     |                                                                                                                                                                                                                                                                                                                                       |                 |
| 4  |                                 |     |                                                                                                                                                                                                                                                                                                                                       |                 |
| 5  | Statistical methods             | 20a | Statistical methods for analysing primary and secondary outcomes. Reference to where other details of the statistical analysis plan can be found, if not in the protocol                                                                                                                                                              | _____20-21_____ |
| 6  |                                 |     |                                                                                                                                                                                                                                                                                                                                       |                 |
| 7  |                                 |     |                                                                                                                                                                                                                                                                                                                                       |                 |
| 8  |                                 | 20b | Methods for any additional analyses (eg, subgroup and adjusted analyses)                                                                                                                                                                                                                                                              | _____n/a_____   |
| 9  |                                 |     |                                                                                                                                                                                                                                                                                                                                       |                 |
| 10 |                                 | 20c | Definition of analysis population relating to protocol non-adherence (eg, as randomised analysis), and any statistical methods to handle missing data (eg, multiple imputation)                                                                                                                                                       | _____n/a_____   |
| 11 |                                 |     |                                                                                                                                                                                                                                                                                                                                       |                 |
| 12 |                                 |     |                                                                                                                                                                                                                                                                                                                                       |                 |
| 13 |                                 |     |                                                                                                                                                                                                                                                                                                                                       |                 |
| 14 | <b>Methods: Monitoring</b>      |     |                                                                                                                                                                                                                                                                                                                                       |                 |
| 15 |                                 |     |                                                                                                                                                                                                                                                                                                                                       |                 |
| 16 | Data monitoring                 | 21a | Composition of data monitoring committee (DMC); summary of its role and reporting structure; statement of whether it is independent from the sponsor and competing interests; and reference to where further details about its charter can be found, if not in the protocol. Alternatively, an explanation of why a DMC is not needed | _____n/a_____   |
| 17 |                                 |     |                                                                                                                                                                                                                                                                                                                                       |                 |
| 18 |                                 |     |                                                                                                                                                                                                                                                                                                                                       |                 |
| 19 |                                 |     |                                                                                                                                                                                                                                                                                                                                       |                 |
| 20 |                                 |     |                                                                                                                                                                                                                                                                                                                                       |                 |
| 21 |                                 |     |                                                                                                                                                                                                                                                                                                                                       |                 |
| 22 |                                 | 21b | Description of any interim analyses and stopping guidelines, including who will have access to these interim results and make the final decision to terminate the trial                                                                                                                                                               | _____n/a_____   |
| 23 |                                 |     |                                                                                                                                                                                                                                                                                                                                       |                 |
| 24 |                                 |     |                                                                                                                                                                                                                                                                                                                                       |                 |
| 25 | Harms                           | 22  | Plans for collecting, assessing, reporting, and managing solicited and spontaneously reported adverse events and other unintended effects of trial interventions or trial conduct                                                                                                                                                     | _____16_____    |
| 26 |                                 |     |                                                                                                                                                                                                                                                                                                                                       |                 |
| 27 |                                 |     |                                                                                                                                                                                                                                                                                                                                       |                 |
| 28 | Auditing                        | 23  | Frequency and procedures for auditing trial conduct, if any, and whether the process will be independent from investigators and the sponsor                                                                                                                                                                                           | _____n/a_____   |
| 29 |                                 |     |                                                                                                                                                                                                                                                                                                                                       |                 |
| 30 |                                 |     |                                                                                                                                                                                                                                                                                                                                       |                 |
| 31 |                                 |     |                                                                                                                                                                                                                                                                                                                                       |                 |
| 32 | <b>Ethics and dissemination</b> |     |                                                                                                                                                                                                                                                                                                                                       |                 |
| 33 |                                 |     |                                                                                                                                                                                                                                                                                                                                       |                 |
| 34 | Research ethics approval        | 24  | Plans for seeking research ethics committee/institutional review board (REC/IRB) approval                                                                                                                                                                                                                                             | _____22_____    |
| 35 |                                 |     |                                                                                                                                                                                                                                                                                                                                       |                 |
| 36 |                                 |     |                                                                                                                                                                                                                                                                                                                                       |                 |
| 37 | Protocol amendments             | 25  | Plans for communicating important protocol modifications (eg, changes to eligibility criteria, outcomes, analyses) to relevant parties (eg, investigators, REC/IRBs, trial participants, trial registries, journals, regulators)                                                                                                      | _____21-22_____ |
| 38 |                                 |     |                                                                                                                                                                                                                                                                                                                                       |                 |
| 39 |                                 |     |                                                                                                                                                                                                                                                                                                                                       |                 |
| 40 |                                 |     |                                                                                                                                                                                                                                                                                                                                       |                 |
| 41 |                                 |     |                                                                                                                                                                                                                                                                                                                                       |                 |
| 42 |                                 |     |                                                                                                                                                                                                                                                                                                                                       |                 |
| 43 |                                 |     |                                                                                                                                                                                                                                                                                                                                       |                 |
| 44 |                                 |     |                                                                                                                                                                                                                                                                                                                                       |                 |
| 45 |                                 |     |                                                                                                                                                                                                                                                                                                                                       |                 |
| 46 |                                 |     |                                                                                                                                                                                                                                                                                                                                       |                 |

|    |                               |     |                                                                                                                                                                                                                                                                                     |                 |
|----|-------------------------------|-----|-------------------------------------------------------------------------------------------------------------------------------------------------------------------------------------------------------------------------------------------------------------------------------------|-----------------|
| 1  | Consent or assent             | 26a | Who will obtain informed consent or assent from potential trial participants or authorised surrogates, and how (see Item 32)                                                                                                                                                        | _____8_____     |
| 2  |                               |     |                                                                                                                                                                                                                                                                                     |                 |
| 3  |                               |     |                                                                                                                                                                                                                                                                                     |                 |
| 4  |                               | 26b | Additional consent provisions for collection and use of participant data and biological specimens in ancillary studies, if applicable                                                                                                                                               | _____n/a_____   |
| 5  |                               |     |                                                                                                                                                                                                                                                                                     |                 |
| 6  |                               |     |                                                                                                                                                                                                                                                                                     |                 |
| 7  | Confidentiality               | 27  | How personal information about potential and enrolled participants will be collected, shared, and maintained in order to protect confidentiality before, during, and after the trial                                                                                                | _____22_____    |
| 8  |                               |     |                                                                                                                                                                                                                                                                                     |                 |
| 9  |                               |     |                                                                                                                                                                                                                                                                                     |                 |
| 10 | Declaration of interests      | 28  | Financial and other competing interests for principal investigators for the overall trial and each study site                                                                                                                                                                       | _____24_____    |
| 11 |                               |     |                                                                                                                                                                                                                                                                                     |                 |
| 12 |                               |     |                                                                                                                                                                                                                                                                                     |                 |
| 13 | Access to data                | 29  | Statement of who will have access to the final trial dataset, and disclosure of contractual agreements that limit such access for investigators                                                                                                                                     | _____22_____    |
| 14 |                               |     |                                                                                                                                                                                                                                                                                     |                 |
| 15 |                               |     |                                                                                                                                                                                                                                                                                     |                 |
| 16 | Ancillary and post-trial care | 30  | Provisions, if any, for ancillary and post-trial care, and for compensation to those who suffer harm from trial participation                                                                                                                                                       | _____n/a_____   |
| 17 |                               |     |                                                                                                                                                                                                                                                                                     |                 |
| 18 |                               |     |                                                                                                                                                                                                                                                                                     |                 |
| 19 |                               |     |                                                                                                                                                                                                                                                                                     |                 |
| 20 | Dissemination policy          | 31a | Plans for investigators and sponsor to communicate trial results to participants, healthcare professionals, the public, and other relevant groups (eg, via publication, reporting in results databases, or other data sharing arrangements), including any publication restrictions | _____22_____    |
| 21 |                               |     |                                                                                                                                                                                                                                                                                     |                 |
| 22 |                               |     |                                                                                                                                                                                                                                                                                     |                 |
| 23 |                               |     |                                                                                                                                                                                                                                                                                     |                 |
| 24 |                               | 31b | Authorship eligibility guidelines and any intended use of professional writers                                                                                                                                                                                                      | _____23-24_____ |
| 25 |                               |     |                                                                                                                                                                                                                                                                                     |                 |
| 26 |                               | 31c | Plans, if any, for granting public access to the full protocol, participant-level dataset, and statistical code                                                                                                                                                                     | _____n/a_____   |
| 27 |                               |     |                                                                                                                                                                                                                                                                                     |                 |
| 28 |                               |     |                                                                                                                                                                                                                                                                                     |                 |
| 29 | <b>Appendices</b>             |     |                                                                                                                                                                                                                                                                                     |                 |
| 30 |                               |     |                                                                                                                                                                                                                                                                                     |                 |
| 31 | Informed consent materials    | 32  | Model consent form and other related documentation given to participants and authorised surrogates                                                                                                                                                                                  | _____n/a_____   |
| 32 |                               |     |                                                                                                                                                                                                                                                                                     |                 |
| 33 |                               |     |                                                                                                                                                                                                                                                                                     |                 |
| 34 | Biological specimens          | 33  | Plans for collection, laboratory evaluation, and storage of biological specimens for genetic or molecular analysis in the current trial and for future use in ancillary studies, if applicable                                                                                      | _____n/a_____   |
| 35 |                               |     |                                                                                                                                                                                                                                                                                     |                 |
| 36 |                               |     |                                                                                                                                                                                                                                                                                     |                 |

\*It is strongly recommended that this checklist be read in conjunction with the SPIRIT 2013 Explanation & Elaboration for important clarification on the items. Amendments to the protocol should be tracked and dated. The SPIRIT checklist is copyrighted by the SPIRIT Group under the Creative Commons "[Attribution-NonCommercial-NoDerivs 3.0 Unported](https://creativecommons.org/licenses/by-nc-nd/3.0/)" license.

# BMJ Open

**A randomized controlled pilot and feasibility study of multimodal agility-based exercise training (MAT) versus strength and endurance training (SET) to improve Multiple Sclerosis-related fatigue and fatigability during inpatient rehabilitation [ReFEx] – study protocol.**

|                                 |                                                                                                                                                                                                                                                                                                                                                                                                                                                                                                                                                                                                                                                                                                                                                                                                                                           |
|---------------------------------|-------------------------------------------------------------------------------------------------------------------------------------------------------------------------------------------------------------------------------------------------------------------------------------------------------------------------------------------------------------------------------------------------------------------------------------------------------------------------------------------------------------------------------------------------------------------------------------------------------------------------------------------------------------------------------------------------------------------------------------------------------------------------------------------------------------------------------------------|
| Journal:                        | <i>BMJ Open</i>                                                                                                                                                                                                                                                                                                                                                                                                                                                                                                                                                                                                                                                                                                                                                                                                                           |
| Manuscript ID                   | bmjopen-2022-062160.R1                                                                                                                                                                                                                                                                                                                                                                                                                                                                                                                                                                                                                                                                                                                                                                                                                    |
| Article Type:                   | Protocol                                                                                                                                                                                                                                                                                                                                                                                                                                                                                                                                                                                                                                                                                                                                                                                                                                  |
| Date Submitted by the Author:   | 02-Jun-2022                                                                                                                                                                                                                                                                                                                                                                                                                                                                                                                                                                                                                                                                                                                                                                                                                               |
| Complete List of Authors:       | <p>Wolf, Florian; Neurological Rehabilitation Centre Godeshoehe; German Sport University Cologne, Department of Molecular and Cellular Sports Medicine</p> <p>Nielsen, Jörn; Neurological Rehabilitation Centre Godeshoehe; University of Cologne, Department of Medical Psychology, Neuropsychology and Gender Studies</p> <p>Saliger, Jochen; Neurological Rehabilitation Centre Godeshoehe</p> <p>Hennecken, Eva; Neurological Rehabilitation Centre Godeshoehe</p> <p>Eschweiler, Mareike; Neurological Rehabilitation Centre Godeshoehe</p> <p>Folkerts, Ann-Kristin; University of Cologne, Department of Medical Psychology, Neuropsychology and Gender Studies</p> <p>Karbe, Hans; Neurological Rehabilitation Centre Godeshoehe</p> <p>Zimmer, Philipp; Technical University Dortmund, Department for Performance and Health</p> |
| <b>Primary Subject Heading</b>: | Rehabilitation medicine                                                                                                                                                                                                                                                                                                                                                                                                                                                                                                                                                                                                                                                                                                                                                                                                                   |
| Secondary Subject Heading:      | Neurology, Qualitative research, Sports and exercise medicine                                                                                                                                                                                                                                                                                                                                                                                                                                                                                                                                                                                                                                                                                                                                                                             |
| Keywords:                       | Multiple sclerosis < NEUROLOGY, SPORTS MEDICINE, REHABILITATION MEDICINE                                                                                                                                                                                                                                                                                                                                                                                                                                                                                                                                                                                                                                                                                                                                                                  |
|                                 |                                                                                                                                                                                                                                                                                                                                                                                                                                                                                                                                                                                                                                                                                                                                                                                                                                           |

SCHOLARONE™  
Manuscripts

1  
2  
3 1 **A randomized controlled pilot and feasibility study of multimodal agility-based exercise**  
4  
5 2 **training (MAT) versus strength and endurance training (SET) to improve Multiple**  
6  
7 3 **Sclerosis-related fatigue and fatigability during inpatient rehabilitation [ReFEx] – study**  
8  
9 4 **protocol.**  
10  
11  
12  
13  
14

15 6 **Akronym: ReFEx (Rehabilitation, Fatigue, and Exercise)**  
16  
17 7

18  
19 8 **Authors:** Florian Wolf<sup>1,2,\*</sup>, Jörn Nielsen<sup>1,3,\*</sup>, Jochen Saliger<sup>1</sup>, Eva Hennecken<sup>1</sup>, Mareike  
20  
21 9 Eschweiler<sup>1</sup>, Ann-Kristin Folkerts<sup>3</sup>, Hans Karbe<sup>1</sup>, Philipp Zimmer<sup>4</sup>  
22  
23

- 24 10  
25  
26 11 1. Neurological Rehabilitation Center Godeshoehe, Waldstraße 2-10, 53177 Bonn, Germany  
27  
28 12 2. Department of Molecular and Cellular Sports Medicine, Institute of Cardiovascular  
29  
30 13 Research and Sports Medicine, German Sport University Cologne, Am Sportpark  
31  
32 14 Müngersdorf 6, 50933 Cologne, Germany  
33  
34  
35 15 3. Department of Medical Psychology, Neuropsychology and Gender Studies, Center for  
36  
37 16 Neuropsychological Diagnostics and Intervention (CeNDI), Faculty of Medicine and  
38  
39 17 University Hospital Cologne, University of Cologne, Kerpener Str. 62, 50937 Cologne,  
40  
41 18 Germany  
42  
43  
44 19 4. Department for Performance and Health, Institute for Sport and Sport Science, Technical  
45  
46 20 University Dortmund, Otto-Hahn-Straße 3, 44227 Dortmund, Germany  
47  
48

49 21 \*These authors share first authorship.  
50  
51  
52  
53

54 23 **Corresponding author:** Florian Wolf, f.wolf@godeshoehe.de  
55  
56  
57  
58  
59  
60

58 25 **Word count: 4336**

1  
2  
3 26 **Trial status:** The first participant has been enrolled on 18 November 2021. At the time of  
4  
5 27 submission, 9/24 participants have been recruited, 3/24 participants have finished the  
6  
7 28 intervention period and completed the primary measurement time point one week after the end  
8  
9 29 of the intervention period.  
10  
11  
12  
13

30

## 31 **ABSTRACT**

32 **Introduction:** Subjective fatigue and objectively assessed fatigability are common symptoms  
33  
34 in persons with Multiple Sclerosis (pwMS). Recent work has suggested a positive effect of  
35  
36 balance and motor control training (BMCT) in reducing fatigue. It is unclear whether this effect  
37  
38 can also be attained during inpatient rehabilitation. Multimodal agility-based exercise training  
39  
40 (MAT) has been developed as a framework that incorporates BMCT with added agility  
41  
42 components but has not been applied to pwMS. Therefore, this study will evaluate the  
43  
44 feasibility of a randomized controlled trial comparing MAT against strength and endurance  
45  
46 training (SET) for the improvement of MS-related fatigue and fatigability in a German  
47  
48 neurologic rehabilitation center.

49 **Methods and analysis:** A total of 24 pwMS (Expanded Disability Status Scale  $\leq 5.0$ , Fatigue  
50  
51 Scale for Motor and Cognitive Functions  $\geq 53$ ) will be randomly assigned to either SET or land  
52  
53 and water-based MAT for 4 to 6 weeks during inpatient rehabilitation. Assessments of  
54  
55 subjective fatigue, motor and cognitive fatigability, cognitive and cardiorespiratory  
56  
57 performance, and balance confidence will be performed at admission and discharge. Subjective  
58  
59 fatigue will also be assessed at 1, 4, and 12 weeks after discharge. Feasibility outcomes will  
60  
include patients' acceptance of study procedures and interventions, recruitment rate, retention  
rate, time needed to complete baseline assessments, intervention adherence, and fidelity. All  
quantitative outcomes will be reported descriptively. A total of 12 pwMS (6 per group) will be  
interviewed to gain insights into participants' experiences during study participation.

1  
2  
3 51 **Ethics and dissemination:** Ethical approval has been obtained from the Ethics Committee of  
4  
5 52 the University of Bonn (reference number: 543/20). Dissemination of findings is planned via  
6  
7 53 peer-reviewed journals, conferences, and media releases.  
8  
9

10 54  
11  
12 55 **Trial registration:** German Clinical Trials Register: DRKS00023943, date of registration: 23  
13  
14 56 September 2021  
15  
16

17 57  
18  
19 58 **Keywords**

20 59 multiple sclerosis, sports medicine, rehabilitation medicine  
21  
22  
23  
24 60

25  
26 61 **Strengths and limitations**

- 27  
28 62 • Comprehensive assessment of subjective fatigue, as well as objective cognitive and  
29  
30 63 motor fatigability  
31  
32 64 • First application of agility-based exercise training to pwMS  
33  
34 65 • Mixed-methods approach to acquire patient perspective and acceptance  
35  
36 66 • Clinical inpatient setting will challenge standardization of study procedures  
37  
38  
39  
40 67

41  
42 68 **INTRODUCTION**

43  
44 69 Fatigue, described as ‘a subjective sensation of lack of energy and exhaustion’ (p. E79)[1], was  
45  
46 70 reported as the most common symptom (58%) among 35,000 patients from the German  
47  
48 71 multiple sclerosis (MS) register[2]. It is also reported as one of the most disabling symptoms[3]  
49  
50 72 with high socioeconomic relevance as 25% of persons with MS (pwMS) have impaired  
51  
52 73 working capacity because of ‘invisible symptoms’ such as fatigue and impaired cognition[4,  
53  
54 74 5].  
55  
56  
57  
58  
59  
60



1  
2  
3 75 Data from the MS register also show that only 35% of fatigued pwMS receive any kind of  
4  
5 76 treatment and among them only 15% receive pharmacological treatment to specifically handle  
6  
7 77 fatigue symptoms[2]. No clear pathomechanisms for fatigue have been defined yet leading to  
8  
9 78 the consequence of still limited pharmacotherapy options for the treatment of fatigue[6].  
10  
11  
12 79 According to the established taxonomy by Kluger and colleagues[7] two concepts must be  
13  
14 80 separated when considering fatigue: (I) the subjective experience of fatigue and (II) objective  
15  
16 81 performance fatigability during motor or cognitive tasks. Whether improvements in fatigability  
17  
18 82 also transfer to subjective fatigue is still unclear. Interestingly, the association between the two  
19  
20 83 constructs seems to be relatively weak[8, 9].  
21  
22  
23 84 Next to distinguishing between ‘fatigue’ and ‘fatigability’, a further dichotomy exists with  
24  
25 85 ‘primary fatigue’ resulting from pathophysiological processes of the disease itself (e.g., central  
26  
27 86 nervous system, immunologic or endocrine changes) and ‘secondary fatigue’ resulting from  
28  
29 87 mechanisms not directly related to the disease (e.g., sleep, depression, medication)[10].  
30  
31  
32 88 To reduce subjective fatigue, exercise interventions have been studied as a non-  
33  
34 89 pharmacological treatment option. However, several methodological issues exist. As fatigue is  
35  
36 90 frequently assessed as a secondary outcome variable, subjects are often not pre-screened for  
37  
38 91 fatigue symptoms at baseline and the intervention is not primarily designed to reduce  
39  
40 92 fatigue[11, 12]. Consequently, to date, there are few studies investigating the specific  
41  
42 93 pathophysiological pathways of primary or secondary fatigue that are altered by exercise[10].  
43  
44  
45 94 In a recent meta-analysis Moss-Morris and colleagues[11] performed a detailed review of  
46  
47 95 exercise intervention studies, that specifically aimed at fatigue reduction. Here, the authors  
48  
49 96 reported variance in the effects of different types of exercise. For example, endurance exercise  
50  
51 97 has been frequently investigated, as it can be easily standardized, but was reported to have only  
52  
53 98 small effects on fatigue outcomes measured with self-report questionnaires[13]. If combined  
54  
55 99 with other modalities such as resistance exercise, effects might be greater (e.g., strength and  
56  
57  
58  
59  
60

1  
2  
3 100 endurance training [SET]). Lastly, types of exercise consisting primarily of stimuli targeting  
4  
5 101 motor control (e.g., balance and motor control training [BMCT]) were described as promising,  
6  
7  
8 102 due to their relatively large effect sizes and specification of a mechanistic pathway.

9  
10 103 In the special setting of inpatient rehabilitation, the number of exercise studies for subjective  
11  
12 104 fatigue reduction is very limited. In their review, Moss-Morris and colleagues[11] identified  
13  
14 105 only one study conducted in an inpatient rehabilitation setting. However, this trial was  
15  
16 106 restricted from the meta-analysis because of methodological limitations, indicating the need  
17  
18 107 for future systematic research on fatigue-specific therapy. This is also evident in the first  
19  
20 108 German practice guideline for exercise therapy in pwMS, which highlights mobility  
21  
22 109 rehabilitation but does not consider symptoms of fatigue or fatigability[14].

23  
24  
25 110 Therefore, the ReFEx (Rehabilitation, Fatigue, and Exercise) project aims to transfer the  
26  
27 111 promising results of interventions focused on balance and motor control to inpatient  
28  
29 112 rehabilitation and compare it with SET, which is considered the control group or 'usual care'.  
30  
31 113 Importantly, we will adapt the existing approaches on BMCT to be based on the agility  
32  
33 114 framework described by Donath and colleagues[15]. Therefore, besides exercises focused on  
34  
35 115 balance and sensory integration, the treatment manual will also include functional leg strength  
36  
37 116 and agility-based exercises. This approach can be characterized as 'multimodal agility-based  
38  
39 117 exercise training' (MAT)[16] and the ReFEx project will be the first to apply it to pwMS. In  
40  
41 118 doing so, we not only expect to target subjective fatigue, but also other frequent MS-specific  
42  
43 119 symptoms including performance fatigability as well as disturbed gait and balance. Applying  
44  
45 120 the agility framework could further provide an opportunity for combined motor and cognitive  
46  
47 121 rehabilitation[17], that is fun, enjoyable, and social[15].

48  
49 122 Referring to the pathophysiological framework by Langeskov-Christensen and colleagues[10]  
50  
51 123 we hypothesize that the SET will improve secondary fatigue via improved aerobic capacity  
52  
53 124 and motor function, while the MAT intervention will improve secondary fatigue via improved  
54  
55  
56  
57  
58  
59  
60

1  
2  
3 125 motor function and reduced cognitive effort in daily life (as hypothesized by Moss-Morris and  
4  
5 126 colleagues[11] and others[18-21]). Based on the existing evidence, we expect greater benefits  
6  
7 127 on secondary fatigue parameters from MAT than for SET. Regarding performance fatigability,  
8  
9 128 we hypothesize, that MAT will be superior to SET in improving motor and cognitive  
10  
11 129 fatigability.  
12  
13

14  
15 130 In a first step, the pilot and feasibility study (PAFS) described in this protocol will be used to  
16  
17 131 determine whether the adapted MAT and SET are feasible in the inpatient rehabilitation setting  
18  
19 132 with a special emphasis on patients' acceptance. This will include both, a quantitative, and  
20  
21 133 qualitative evaluation.  
22  
23

24 134

## 25 26 135 **METHODS AND ANALYSIS**

### 27 28 136 **Study design**

29  
30 137 The PAFS will be conducted at the Neurological Rehabilitation Center (NRC) 'Godeshoehe'  
31  
32 138 (Bonn; certified MS Rehabilitation Center). It will have a two-armed, parallel-group,  
33  
34 139 randomized-controlled design with twelve weeks follow-up, following a mixed-methods  
35  
36 140 approach. Measurement time points are provided in the Standard Protocol Items:  
37  
38 141 Recommendations for Interventional Trials (SPIRIT) figure (Table 1).  
39  
40  
41

42 142

### 43 44 143 **Patient and public involvement**

45  
46 144 In our therapeutic work of several years in a specialized rehabilitation clinic for MS, the  
47  
48 145 majority of pwMS report that fatigue is difficult to cope with and limits quality of life. These  
49  
50 146 patient reports were the impetus for the conception of this study, especially as there are few  
51  
52 147 evaluated therapy approaches. In the conception of this PAFS, it was important for us to  
53  
54 148 appreciate the patient perspective and to include the affected persons as 'experts of their  
55  
56 149 disease'. In particular, this takes the form of qualitative interviews, which we base on a  
57  
58  
59  
60

150 constructivist paradigm that allows for the co-creation of knowledge by the participants and  
 151 the researcher[22].

152

153 **Table 1** SPIRIT figure depicting the schedule of enrollment, interventions and assessments for  
 154 the pilot and feasibility study.

|                                           | STUDY PERIOD |            |                 |       |       |       |       |
|-------------------------------------------|--------------|------------|-----------------|-------|-------|-------|-------|
|                                           | Enrolment    | Allocation | Post-Allocation |       |       |       |       |
| TIMEPOINT                                 | $-T_0$       | 0          | $T_0$           | $T_1$ | $T_2$ | $T_3$ | $T_4$ |
| <b>ENROLMENT:</b>                         |              |            |                 |       |       |       |       |
| Eligibility screen                        | X            |            |                 |       |       |       |       |
| Informed consent                          | X            |            |                 |       |       |       |       |
| Stratified randomization                  |              | X          |                 |       |       |       |       |
| <b>INTERVENTIONS</b>                      |              |            |                 |       |       |       |       |
| <i>MAT</i>                                |              |            | ↔               |       |       |       |       |
| <i>SET</i>                                |              |            | ↔               |       |       |       |       |
| <b>ASSESSMENTS:</b>                       |              |            |                 |       |       |       |       |
| <i>Fatigue (WEIMuS)</i>                   | X            |            |                 | X     | X     | X     | X     |
| <i>Fatigue (FSMC)</i>                     | X            |            |                 | X     | X     | X     | X     |
| <i>Cognitive fatigability (TAP-Alert)</i> |              |            | X               | X     |       |       |       |
| <i>Motor fatigability (6MWT)</i>          | X            |            |                 | X     |       |       |       |
| <i>Cognitive performance (CVLT, SDMT)</i> |              |            | X               | X     |       |       |       |
| <i>Cardiorespiratory fitness (GXT)</i>    |              |            | X               | X     |       |       |       |
| <i>Motor function (T25FW, SSST, FGA)</i>  | X            |            |                 | X     |       |       |       |
| <i>Balance confidence (ABC)</i>           | X            |            |                 | X     |       |       |       |
| <i>Depression (CES-D)</i>                 |              |            | X               | X     |       |       |       |

|                                        |  |  |  |   |   |  |  |  |  |
|----------------------------------------|--|--|--|---|---|--|--|--|--|
| <i>Feasibility outcomes</i>            |  |  |  |   |   |  |  |  |  |
| <i>Interview 1 (Feasibility)</i>       |  |  |  | X |   |  |  |  |  |
| <i>Interview 2 (Fatigue responder)</i> |  |  |  |   | X |  |  |  |  |

155  
 156  $-T_0$  = admission; 0 = after written informed consent;  $T_0$  = post-randomization;  $T_1$  = prior to  
 157 discharge;  $T_2$  = 1 - 2 weeks after discharge;  $T_3$  = 4 weeks after discharge;  $T_4$  = 12 weeks after  
 158 discharge; *MAT* = Multimodal Agility-based exercise Training; *SET* = Strength and Endurance  
 159 Training; *WEIMuS* = Würzburg Fatigue Inventory for Multiple Sclerosis; *FSMC* = Fatigue  
 160 Scale for Motor and Cognitive Functions; *TAP-Alert* = Test Battery of Attention Performance  
 161 – Alertness; *6MWT* = 6-Minute Walk Test; *CVLT* = California Verbal Learning Test; *SDMT* =  
 162 Symbol Digit Modalities Test; *GXT* = Graded Exercise Test; *T25FW* = Timed 25-foot Walk  
 163 Test; *SSST* = Six Spot Step Test; *FGA* = Functional Gait Assessment; *ABC* = Activities-  
 164 Specific Balance Confidence Scale; *CES-D* Center for Epidemiological Studies Depression  
 165 Scale (German version)

166

### 167 **Screening and recruitment**

168 Individuals admitted to the NRC will be screened for pwMS. All pwMS will then be scheduled  
 169 for neuropsychological examination the day after admission, according to usual practice. Here,  
 170 patients will be asked to complete the Fatigue Scale for Motor and Cognitive Functions  
 171 (FSMC). If a patient is classified as, at least, ‘moderately fatigued’ and the patient fulfills all  
 172 other eligibility criteria (Table 2), he or she will be informed about the study by his or her  
 173 neuropsychologist (JN, JS, EH), verbally, and in written form.

174

### 175 **Randomization**

176 If patients provide the written informed consent to one of the study staff members within a  
 177 maximum of three days, they will be randomly allocated (1:1) to the intervention or control

1  
2  
3 178 group according to the minimization procedure[23] and stratified by Expanded Disability  
4  
5 179 Status Scale (EDSS,  $\leq 3$  or  $\geq 3.5$ ), Würzburg Fatigue Inventory for Multiple Sclerosis  
6  
7 180 (WEIMuS,  $< 38$  or  $\geq 38$ ), age ( $< 45$  or  $\geq 45$ ), and MS disease course (relapsing-remitting or  
8  
9 181 secondary-progressive). Randomization will be provided by an independent researcher from  
10  
11 182 the German Sport University Cologne using RITA ('Randomization-In-Treatment-Arms',  
12  
13 183 Evident, Germany).  
14  
15  
16

17 184

### 185 **Sample size and duration**

186 Data from the PAFS is planned to be pooled with data from the full trial in case no major  
187 changes of study protocol will be necessary (see progression requirements). Acceptability of  
188 pooling will be evaluated according to components listed in the 'Acceptance checklist for  
189 clinical effectiveness pilot trials'[24]. As the primary aim of this trial is to evaluate the  
190 feasibility, no sample size calculation based on statistical assumptions will be performed.  
191 However, we consider a minimum of twelve recruited patients per study arm to be a reasonable  
192 sample size for this setting[25].

193 The NRC treats about 100 – 120 pwMS per year. According to previous data collections for  
194 the German MS register no more than 25% of patients will have to be excluded, based on EDSS  
195 and FSMC screening (see eligibility criteria). We further predict no more than 10% of eligible  
196 patients to be unwilling to participate, based on previously conducted studies. Comparable  
197 studies have had high retention rates (95%[26]) but did not choose a primary endpoint after  
198 patients returned home. Consequently, we plan with 80% retention from  $T_0$  to  $T_2$ . This will  
199 result in a feasibility period of about six to eight months. Retention rates will be used to inform  
200 the sample size calculation for the full randomized controlled trial (RCT).

201

### 202 **Participants**

203 PwMS will be eligible to participate in this trial according to the inclusion and exclusion criteria  
 204 stated in Table 2.413

205

206 **Table 2** Eligibility criteria.

| Inclusion                               | Exclusion                                                                                                         |
|-----------------------------------------|-------------------------------------------------------------------------------------------------------------------|
| <b>1. MS disease course</b><br>RR or SP | <b>1. Unable to attend water therapy</b>                                                                          |
| <b>2. Age</b><br>18 - 67                | <b>2. Comorbidities</b><br>That prevent attending study therapies,<br>chronic neurologic conditions other than MS |
| <b>3. EDSS</b><br>≤5.0                  | <b>3. German language skills</b><br>That interfere with understanding of<br>testing and instructions              |
| <b>4. FSMC total score</b><br>≥53       | <b>4. Current fatigue medication</b><br>Amantadine, Modafinil started <3 months                                   |
| <b>5. Written informed consent</b>      |                                                                                                                   |

207 *RR* = Relapsing-remitting; *SP* = Secondary-progressive; *EDSS* = Expanded Disability Status  
 208 Scale; *FSMC* = Fatigue Scale for Motor and Cognitive Functions.

209

## 210 Interventions

211 The intervention period includes the time from admission to discharge, which usually  
 212 comprises four to six weeks for this group of patients. Multidisciplinary inpatient rehabilitation  
 213 can consist of various diagnostic and therapeutic components such as exercise training,  
 214 occupational and physical therapy, health education, neuropsychological assessment, or  
 215 assessment of working capacity. Thus, interactions between treatments as well as flexibility in  
 216 the treatment schedule are common[27]. For this reason, we designed the schedules of the two  
 217 study groups to ensure the following:

218 (I) Distinct differences in the amount of therapy targeting cognitive and sensory integration.

219 (II) Standardization of treatment as strictly as possible within this specific clinical setting.

220 (III) Approximately equivalent amount of total therapy time.

221 See Table 3 for an overview of intervention components. Reporting of the interventions will  
 222 follow the modified Consensus on Exercise Reporting Template (CERT) for Therapeutic  
 223 Exercise Interventions[28].

225 **Table 3** Frequency, time, and type of intervention components.

| MAT (intervention)           | SET (control)                   |
|------------------------------|---------------------------------|
| 5x/w, 30min, 'MS-group'      |                                 |
| 5x/w, 30min, land-based MAT  | 5x/w, 22min, endurance training |
| 3x/w, 30min, water-based MAT | 3x/w, 30min, strength training  |

227 Standard treatment for both groups

228 Both groups will attend the 'MS-group', a specific group for all pwMS, focusing on body  
 229 awareness and relaxation techniques. It consists of max. eight pwMS, lasts 30min and is led by  
 230 an exercise therapist. Both groups will also attend MS-specific lectures once a week. All other  
 231 available therapies, which are not part of standard treatment, will be included only after  
 232 individual consideration to maximize standardization.

234 Strength and Endurance Training (SET)

235 The combined strength and endurance training program will be considered the control  
 236 condition. All endurance training sessions will be supervised by exercise therapists from the  
 237 NRC. Strength training sessions will be supervised by exercise science students or therapists  
 238 in one-on-one sessions. Students and therapists conducting the strength training will be



1  
2  
3 239 instructed by FW and will follow a training protocol (see Supplemental File [Strength  
4  
5 240 Protocol]).

6  
7  
8 241 Endurance training will be performed according to the standard protocol in this clinic, with  
9  
10 242 22min per session (3min of gradual increase, 17min steady and 2min cool-down) on a cycle  
11  
12 243 ergometer (ergoselect 5, ergoline GmbH, Bitz, Germany) with continuous monitoring of power  
13  
14 244 output and heart rate (ers.2 software, ergoline GmbH, Bitz, Germany). Endurance training will  
15  
16  
17 245 be performed in groups of max. eight patients. In the first session, participants will start their  
18  
19 246 training at an intensity that was rated “light” to “somewhat hard” by themselves during the  
20  
21 247 baseline graded exercise test (GXT) (equivalent to 11-13 on the 6-20 Rated Perceived Exertion  
22  
23 248 [RPE] – scale). In the following sessions, therapists will regulate the power output so that  
24  
25 249 participants stay between 11 and 13 on the RPE-scale. If a pwMS is unable to complete the  
26  
27 250 total duration, the session duration can be initially reduced and then progressed in the following  
28  
29 251 sessions. The range of 11 to 13 was chosen based on recent evidence-based recommendations  
30  
31 252 for pwMS with similar EDSS[29].

32  
33  
34  
35 253 Resistance training will be adapted from Callesen and colleagues[18] to fit the inpatient setting.  
36  
37 254 Each session will start with a 5min warm-up on an elliptical trainer, treadmill, or recumbent  
38  
39 255 stepper, followed by three to four exercises targeting hip, knee, and ankle flexion and  
40  
41 256 extension, as well as hip abduction. Exercises will be progressed as follows:

- 42  
43  
44  
45 257 • Session 1-5: 3x10 repetitions with the 15 repetitions maximum (RM)  
46  
47 258 • Session 6-T<sub>1</sub> (session 10-16): 3x12 repetitions with 12RM

48  
49 259 In detail, for every new exercise, therapists will initially determine the respective weight the  
50  
51 260 participant is able to move no more than the intended RM. Therapists will be given the  
52  
53 261 necessary room for individualization but will be instructed to follow pre-specified exercises  
54  
55 262 (see Supplemental File [Strength Protocol]).

56  
57  
58 263  
59  
60

1  
2  
3 264 Multimodal agility-based exercise training (MAT)  
4

5 265 For the treatment manual see Supplemental File [MAT-Manual]. All sessions will be guided  
6  
7 266 by max. three different exercise therapists (including FW) from the NRC, experienced with  
8  
9 267 providing balance exercises on land and in the water in group settings. However, as MAT also  
10  
11 268 comprises other/new elements, exercise therapists will be specifically trained by FW and  
12  
13 269 instructed to follow the treatment manual.  
14

15  
16  
17 270 Both parts (i.e., water and land) will be installed within existing group therapies. Each group  
18  
19 271 will consist of max. eight participants. Empty spots will be filled with other patients from the  
20  
21 272 NRC. The intervention program will consist of three main components: (1) standing balance  
22  
23 273 exercises, (2) dynamic balance exercises including functional leg strength, (3) agility-like  
24  
25 274 exercises including change of direction and change of velocity[16]. Each main component will  
26  
27 275 be represented in several modules. Each module is constructed as a basic set-up, that can be  
28  
29 276 progressed in terms of difficulty. Additionally, modifications on a cognitive (e.g., memory,  
30  
31 277 attention, inhibition) and sensory (i.e., visual, somatosensory, vestibular) level are described.  
32  
33 278 As stated by Callesen and colleagues[18] there is no consensus yet on how to define intensity  
34  
35 279 or progression in balance and motor control exercises. Thus, for this intervention, therapists  
36  
37 280 will be instructed to aim for a level of difficulty and complexity that keeps exercises  
38  
39 281 manageable and safe for participants, but also provokes motor or cognitive errors. This is in  
40  
41 282 line with recommendations for neurorehabilitation from basic science[30].  
42  
43  
44  
45

46 283 For load management in the land-based therapy, there will be three sessions with higher  
47  
48 284 physical strain (i.e., agility-like components and functional leg strength) interspersed with two  
49  
50 285 sessions with lower physical strain (i.e., standing balance and exercises with a cognitive focus).  
51  
52 286 Due to water immersion, physical strain in the water-based therapy should be lower in general.  
53  
54  
55  
56  
57  
58  
59  
60

1  
2  
3 287 Participants will be instructed to take individual breaks whenever they need to. They will also  
4  
5 288 be advised to monitor their fatigue during their stay and skip a session when they need more  
6  
7 289 time to recuperate.  
8  
9

10 290

### 11 291 **Blinding**

12 292 The neuropsychological staff conducting the cognitive tests will be blinded to the study groups.  
13  
14 293 However, for organizational reasons and specifics of the study setting, blinding of participants,  
15  
16 294 therapists conducting the interventions as well as personnel conducting the motor and  
17  
18 295 cardiorespiratory fitness (CRF) tests and analyzing the questionnaires will not be possible.  
19  
20  
21  
22  
23

24 296

### 25 297 **Outcomes**

26 298 As depicted in Table 1, assessments will be carried out at admission (i.e., pre-intervention, T<sub>0</sub>)  
27  
28 299 and discharge (i.e., post-intervention, T<sub>1</sub>), as well as after participants have returned home (i.e.,  
29  
30 300 follow-up, T<sub>2</sub>-T<sub>4</sub>).  
31  
32

33 301

34 302 Baseline sample characteristics

35 303 Demographic data on age and sex will be taken from electronic records. Height will be  
36  
37 304 ascertained from participants. Bodyweight at T<sub>0</sub> will be assessed with normal clothing, but  
38  
39 305 without shoes, prior to GXT using a digital scale. The corresponding Body Mass Index will  
40  
41 306 then be calculated (kg/m<sup>2</sup>).  
42  
43  
44

45 307 Clinical data will include the following. MS disease course, and time since diagnosis (years)  
46  
47 308 will be taken from available medical records in the screening process. In case of an unspecified  
48  
49 309 MS disease course, the participant and the treating physician will be contacted for any further  
50  
51 310 information. EDSS, disease-modifying drugs, fatigue-specific drugs (Amantadine, Modafinil),  
52  
53 311 and drugs decreasing heart rate will be assessed by the treating physician on the day of arrival  
54  
55  
56  
57  
58  
59  
60

1  
2  
3 312 and made available for the study staff in the electronic health record. Use of assistive devices  
4  
5 313 for walking will be ascertained in conjunction with motor function testing.  
6  
7  
8 314

9  
10 315 Feasibility (quantitative)

11  
12 316 To generate the quantitative feasibility outcomes, we adopted the categories described by  
13  
14 317 Thabane and colleagues[31] and promoted for exercise studies in MS by Learmonth and  
15  
16 318 Motl[32] (see Table 4).  
17  
18  
19  
20  
21  
22  
23  
24  
25  
26  
27  
28  
29  
30  
31  
32  
33  
34  
35  
36  
37  
38  
39  
40  
41  
42  
43  
44  
45  
46  
47  
48  
49  
50  
51  
52  
53  
54  
55  
56  
57  
58  
59  
60

319 **Table 4** Description of quantitative feasibility outcomes (adapted from[33]).

| Classification | Outcome             | Operationalization                                                                                                                                                                                                                                                                                                                                                                                                                                                                                                                                                                                               | Importance for future RCT                                                                                                                                                                                                                                                                                  |
|----------------|---------------------|------------------------------------------------------------------------------------------------------------------------------------------------------------------------------------------------------------------------------------------------------------------------------------------------------------------------------------------------------------------------------------------------------------------------------------------------------------------------------------------------------------------------------------------------------------------------------------------------------------------|------------------------------------------------------------------------------------------------------------------------------------------------------------------------------------------------------------------------------------------------------------------------------------------------------------|
| Process        | 1. Eligibility rate | <ul style="list-style-type: none"> <li>Number/rate of patients being eligible</li> <li>Number/rate of negative cases for each eligibility criterium</li> </ul>                                                                                                                                                                                                                                                                                                                                                                                                                                                   | Determines criteria that might produce too many non-eligible patients for the trial to be conducted in a reasonable timeframe                                                                                                                                                                              |
|                | 2. Recruitment rate | <ul style="list-style-type: none"> <li>Number of patients successfully randomized per month</li> </ul>                                                                                                                                                                                                                                                                                                                                                                                                                                                                                                           | Evaluates whether the number of participants randomized is high enough to allow for a time-efficient execution                                                                                                                                                                                             |
|                | 3. Refusal rate     | <ul style="list-style-type: none"> <li>Number/rate of patients eligible but unwilling to participate (with reasons)</li> </ul>                                                                                                                                                                                                                                                                                                                                                                                                                                                                                   | Provides insights on possible barriers for participation, which might be counteracted by better study information and addressing these barriers.                                                                                                                                                           |
|                | 4. Retention rate   | <ul style="list-style-type: none"> <li>Number/rate of patients completing the intervention period</li> <li>Number/rate of patients returning the WEIMuS at T<sub>2</sub></li> </ul>                                                                                                                                                                                                                                                                                                                                                                                                                              | Provides information on the risk of subjects dropping out during the intervention period, which might necessitate adaptations to the interventions or the organization of the study. Gives information on the feasibility of the primary outcome being assessed post-discharge and via an online platform. |
|                | 5. Adherence        | <ul style="list-style-type: none"> <li>Number of therapy sessions conducted relative to sessions scheduled</li> </ul>                                                                                                                                                                                                                                                                                                                                                                                                                                                                                            | Gives information on how many sessions would normally be feasible to conduct during the inpatient stay                                                                                                                                                                                                     |
|                | 6. Fidelity         | <ul style="list-style-type: none"> <li>SET: training protocols will be reviewed to ensure that communicated principles were followed: (I) number of exercises performed each session, (II) total training load prescribed relative to actual training load per exercise (e.g., target: 3 (sets) x 10 (repetitions) x 20 (weight) = 600, moved: 3 x 10 x 15 = 450, percentage: 75%). The ers.2 software will document all endurance training sessions, which will provide measures of training duration and intensity (average heart rate, average power, 6-20 RPE) relative to the prescribed values.</li> </ul> | Gives detailed information on whether subjects were able to perform the SET as planned. In the MAT, therapist's usage of the manual will be observable. This will allow for guided adaptations of the intervention protocols, if necessary.                                                                |

|                   |                   |                                                                                                                                                                                                                                                                                                                                                                                                                                                                                                                                                                                                                                                            |                                                                                                                                                                                                                                                                                |
|-------------------|-------------------|------------------------------------------------------------------------------------------------------------------------------------------------------------------------------------------------------------------------------------------------------------------------------------------------------------------------------------------------------------------------------------------------------------------------------------------------------------------------------------------------------------------------------------------------------------------------------------------------------------------------------------------------------------|--------------------------------------------------------------------------------------------------------------------------------------------------------------------------------------------------------------------------------------------------------------------------------|
|                   |                   | <ul style="list-style-type: none"> <li>• MAT: To quantify the degree of aerobic challenge, in the land-based sessions, patients will be wearing heart rate sensors (Verity Sense, Polar, Kempele, Finland). Average and maximum heart rate values for each session and patient will be tracked using software (Polar Team App).</li> <li>• MAT: Components of each session will be coded by the operating therapist according to the MAT manual (SB = standing balance, DB = dynamic balance and functional leg strength, AG = agility-like) to get an approximate distribution.</li> </ul>                                                                |                                                                                                                                                                                                                                                                                |
| <b>Resources</b>  | Time              | <ul style="list-style-type: none"> <li>• Number of days needed to complete baseline assessments</li> <li>• Time requirements for (I) the first (T25FW, SSST, FGA, 6MWT) and second (GXT) physical testing blocks at <math>T_0</math> and <math>T_1</math>, (II) preparation of MAT sessions</li> </ul>                                                                                                                                                                                                                                                                                                                                                     | Evaluates whether baseline assessments can be scheduled in a timely manner before the start of the intervention period. Precise time requirements will allow for better scheduling of study-related appointments.                                                              |
| <b>Management</b> | Data              | <ul style="list-style-type: none"> <li>• Number of missing items for FSMC and WEIMuS for all measurement timepoints</li> <li>• Number of missing outcomes for <math>T_0</math> and <math>T_1</math></li> </ul>                                                                                                                                                                                                                                                                                                                                                                                                                                             | Provides information on actions to take to ensure questionnaires will be fully completed and all assessments taken.                                                                                                                                                            |
| <b>Scientific</b> | 1. Adverse events | <ul style="list-style-type: none"> <li>• Number and kind of adverse events related to study interventions</li> </ul>                                                                                                                                                                                                                                                                                                                                                                                                                                                                                                                                       | Establishes the safety of all interventions.                                                                                                                                                                                                                                   |
|                   | 2. Acceptability  | <ul style="list-style-type: none"> <li>• Perceived exertion: Session-RPE after each endurance, strength, and MAT session (Category Ratio (CR-10) RPE scale as developed by Foster and colleagues [34, 35]). After each session patients will be asked: "How strenuous was the session as a whole?". Patients will be instructed to provide a global rating of the complete session and not to focus on specific aspects.</li> <li>• Fun during training and relevance of training for daily life: assessed at <math>T_1</math> by using customized questions with a four-point Likert-type scale ranging from "not at all" to "very much" [36].</li> </ul> | Perceived exertion in both groups will determine whether the interventions are perceived to be too strenuous or too easy. Fun and relevance are important measures of motivation. In case of low values, additional actions will be necessary to ensure sufficient motivation. |

320 *RCT* = randomized-controlled trial;  $T_0$  = post-randomization;  $T_1$  = prior to discharge;  $T_2$  = 1 - 2 weeks after discharge; *WEIMuS* = Würzburg

321 Fatigue Inventory for Multiple Sclerosis; *MAT* = Multimodal Agility-based exercise Training; *SET* = Strength and Endurance Training; *RPE* =

1  
2  
3 322 Rated Perceived Exertion; *GXT* = Graded Exercise Test; *T25FW* = Timed 25-foot Walk Test; *SSST* = Six Spot Step Test; *FGA* = Functional Gait  
4  
5 323 Assessment; *FSMC* = Fatigue Scale for Motor and Cognitive Functions  
6  
7  
8  
9  
10  
11  
12  
13  
14  
15  
16  
17  
18  
19  
20  
21  
22  
23  
24  
25  
26  
27  
28  
29  
30  
31  
32  
33  
34  
35  
36  
37  
38  
39  
40  
41  
42  
43  
44  
45  
46

For peer review only

1  
2  
3 324 Feasibility (qualitative)  
4

5 325 The qualitative evaluation aims to (a) capture patients' views on acceptance, benefits, and  
6  
7 326 satisfaction with study participation, (b) assess their experiences with the intervention methods,  
8  
9  
10 327 and (c) identify necessary adaptations. For this purpose, we designed a semi-structured interview.  
11  
12 328 Six participants from each study arm will be interviewed face-to-face at T<sub>1</sub>. The selection of  
13  
14 329 participants will reflect the greatest possible diversity in terms of gender, age, and EDSS[37].  
15  
16  
17 330 The interview will include a total of 14 questions and will last approximately 20min. Key  
18  
19 331 categories of the interview are the concept of fatigue, experiences and demands of the  
20  
21 332 interventions, personal relevance, and goal achievement. All interviews will be recorded  
22  
23 333 digitally and transcribed verbatim by an independent transcription service.  
24  
25

26 334 Both interviewers (JN, FW) have several years of clinical experience with pwMS. A first draft  
27  
28 335 of this interview was piloted with three pwMS prior to the start of the feasibility study to ensure  
29  
30 336 that the questions allow valid insights into participants' experiences.  
31  
32

33 337 The interview will be supplemented by a customized questionnaire asking for prior knowledge  
34  
35 338 of fatigue, prior experiences with MAT and SET, and comprehensibility of the study  
36  
37 339 instructions and questionnaires. The questionnaire also asks about fun and relevance of training  
38  
39 340 for daily life (see Table 4), and the motivation to continue a comparable training at home.  
40  
41

42 341  
43

44 342 Primary outcome for the full RCT  
45

46 343 Fatigue questionnaires presuppose internal averaging of the amount of fatigue experienced  
47  
48 344 during a certain timeframe[1]. This has been a problem for studies evaluating short-term  
49  
50 345 interventions, as in some questionnaires patients are asked to evaluate their fatigue in  
51  
52 346 timeframes of up to four weeks. As we are interested in the change in fatigue experienced in  
53  
54 347 daily life from before the inpatient stay to afterwards, we (I) chose the WEIMuS[38] as the  
55  
56 348 primary outcome measure to assess the fatigue experienced during the past week and (II)  
57  
58  
59  
60



1  
2  
3 349 established the primary endpoint to be one to two weeks after participants have returned home  
4  
5 350 (T<sub>2</sub>). The WEIMuS has 17 items (scored 0 - 4) with higher total scores indicating higher fatigue  
6  
7 351 (range 0 – 68, cut-off for classification as fatigued: 32).

8  
9  
10 352 For fatigue screening (that is necessary for study eligibility) we will apply the FSMC. It is a 20  
11  
12 353 item Likert-type scale (1 – 5) with a total score (0 – 100) and two subscales relating to motor  
13  
14 354 and cognitive fatigue[39]. The FSMC provides cut-off scores to classify cases of no (total score  
15  
16 355 < 43), mild ( $\geq 43$ ), moderate ( $\geq 53$ ) and severe ( $\geq 63$ ) fatigue, which makes it especially suitable  
17  
18 356 as a tool for classification of fatigue severity[1, 39].

19  
20  
21 357 Paper versions of both questionnaires will be handed out to participants. When at home,  
22  
23 358 participants will be followed up via e-mail to fill out questionnaires on an online platform  
24  
25 359 (Qualtrics) at timepoints T<sub>2</sub>-T<sub>4</sub>. Participants will be able to respond to the e-mail request within  
26  
27 360 seven days.

28  
29  
30 361

31  
32  
33 362 Secondary outcomes for the full RCT

34  
35 363 MS-fatigue is a multifactorial construct that requires assessment of other interrelated  
36  
37 364 constructs[7]. This will include measures of cognitive (Test Battery of Attention Performance  
38  
39 365 – Alertness[40]) and motor fatigability (6-Minute Walk Test [6MWT], Distance Walked  
40  
41 366 Index[41]), cognitive performance (California Verbal Learning Test, Symbol Digit Modalities  
42  
43 367 Test[26, 42]) and cardiorespiratory fitness (GXT on a cycle ergometer, protocol: start 25W,  
44  
45 368 progression 10W/min.). Dynamic balance and motor function (Timed 25-Foot Walk Test  
46  
47 369 [T25FW][43], Six Spot Step Test [SSST][44], Functional Gait Assessment [FGA][45]) will  
48  
49 370 also be assessed as well as self-reported balance confidence (Activities-specific Balance  
50  
51 371 Confidence scale[46]). Depression (Center for Epidemiological Studies Depression Scale  
52  
53 372 [German version][47]) will be assessed as a confounder variable.  
54  
55  
56  
57  
58  
59  
60

1  
2  
3 373 The subsequent full trial will also include qualitative data to explore the subjective experiences  
4  
5 374 in participants showing a WEIMuS change of 6 or more points from T<sub>0</sub> to T<sub>2</sub> (positive or  
6  
7  
8 375 negative). These ‘responders’ will be contacted for a short telephone interview. Previous data  
9  
10 376 has shown large differences in fatigue questionnaire change scores[13]. However, the scores  
11  
12 377 do not provide any detail on individual circumstances, including, for example, social or work-  
13  
14 378 related influences, that might be independent of intervention effects. Therefore, we decided to  
15  
16  
17 379 specifically ask participants:

18  
19 380 ‘The analysis of your questionnaires shows a relevant positive/negative change of  
20  
21 381 your fatigue symptoms, when comparing your scores from pre-rehab to the online  
22  
23  
24 382 questionnaire. What do you personally think is the reason for this?’.

25  
26 383 No minimal clinically relevant change scores have been established yet[48]. Thus, the relevant  
27  
28 384 change score ( $\geq 6$  or  $\leq -6$ ) was chosen as a pragmatic value of 0.5 SD from the validation  
29  
30 385 study[49]. A similar procedure has been described by Sander and colleagues[1].  
31  
32

33 386

### 35 387 **Data analysis**

#### 37 388 Quantitative data analysis

39  
40 389 Descriptive statistics will be used to summarize quantitative feasibility outcomes (Table 4),  
41  
42 390 and baseline sample characteristics. Retention, adherence, fidelity, adverse events, and  
43  
44 391 acceptability measures will be calculated per group. The results will be given as mean and  
45  
46  
47 392 standard deviation for continuous data, median and interquartile range, or frequencies (number,  
48  
49 393 %) for categorical data. The same will be applied to baseline and follow-up data for primary  
50  
51 394 and secondary outcomes of the potential full trial. Change scores from baseline will be reported  
52  
53 395 for these outcomes for each of the measurement timepoints. The frequency of participants in  
54  
55  
56 396 each group with a relevant change related to the WEIMuS total score ( $\geq 6$  or  $\leq -6$ , as described  
57  
58 397 above), will be calculated. However, hypothesis testing of within- or between-group treatment  
59  
60

1  
2  
3 398 effects will not be performed due to the inherent problems of hypothesis testing based on  
4  
5 399 (small) pilot study data[50, 51]. For the same reasons, no effect sizes will be presented, as they  
6  
7  
8 400 will have a high risk of under- or overestimating the ‘true effect’ of the interventions[52].  
9

10 401 All analyses will be performed using IBM SPSS Statistics in the most up to date version.  
11  
12 402

### 14 403 Qualitative data analysis

16 404 Coding of the interviews will be performed according to qualitative content analysis, using a  
17  
18 405 combined model of deductive (a priori) and inductive coding (on the text material) to identify  
19  
20 406 themes and sub-themes[53]. Deductive coding will be based on preliminary considerations and  
21  
22 407 hypotheses in the study planning and on reviews of relevant literature[37, 54-57]. Coding will  
23  
24 408 be carried out by at least two individuals (JN, FW) to ensure intercoder reliability[58]. The  
25  
26 409 analysis will be supported by MAXQDA® software in the most up to date version[59]. JN and  
27  
28 410 FW will compile the themes emerging from the interview data and discuss these with the wider  
29  
30 411 research team.  
31  
32  
33  
34  
35 412

### 37 413 **Progression requirements to full RCT**

38 414 Falling short of the following feasibility values will necessitate changes to the protocol of the  
39  
40 415 full RCT:

- 41 416 • Adherence: Average of at least 18 therapy sessions during the stay per group (equals  
42 417 6x30min sessions per week for 3 weeks [28 days admission to discharge minus 5 days  
43 418 for pre- and post-testing])
  - 44 419 • Recruitment rate: 4 participants/month, <25% non-eligible pwMS, <10% eligible but  
45 420 unwilling to participate
  - 46 421 • Retention at T<sub>1</sub>: >90% per group
  - 47 422 • Retention at T<sub>2</sub>: >80% per group
- 48  
49  
50  
51  
52  
53  
54  
55  
56  
57  
58  
59  
60

- 1  
2  
3 423 • Time requirements for baseline assessments: >80% able to complete all assessments  
4  
5 424 within the first three days of therapy  
6  
7  
8 425 • Interview statements indicating that the interventions are perceived as relevant,  
9  
10 426 comprehensible, and pleasant  
11

12 427

14  
15 428 **Data management**

16  
17 429 The principal investigator (FW) will be responsible for data management. Demographic and  
18  
19 430 clinical characteristics will be taken from the electronic health record. All other data will be  
20  
21 431 collected on forms during the inpatient stay and via an online tool for follow-up. Data will be  
22  
23 432 entered into a secure internal network database by study personnel in the NRC. Entered data  
24  
25 433 will be checked for plausibility and compared to the collection forms if necessary. Data will be  
26  
27 434 collected and stored in accordance with the General Data Protection Regulation.  
28  
29

30 435

31  
32  
33 436 **ETHICS AND DISSEMINATION**

34  
35 437 Written informed consent will be obtained from each participant. Ethical approval was  
36  
37 438 obtained from the Ethics Committee at the Medical Faculty, University of Bonn (reference  
38  
39 439 number: 543/20).  
40

41  
42 440 The results of this feasibility study will be disseminated regardless of the magnitude or  
43  
44 441 direction of effect in peer-reviewed journals, conferences and the website and magazines of the  
45  
46 442 German Sport University Cologne.  
47

48 443

49  
50  
51 444 **DISCUSSION**

52  
53 445 This PAFS will give relevant insights for conducting a future RCT in this special setting of  
54  
55 446 inpatient rehabilitation for pwMS. Content-wise, it will (I) translate existing evidence on  
56  
57 447 BMCT in pwMS to this setting, (II) add to this BMCT by introducing the framework of MAT,  
58  
59  
60

1  
2  
3 448 and (III) apply a clear focus on fatigue as the primary outcome. Specifically, we see the  
4  
5 449 potential of a relatively large training volume (e.g., about eight therapy sessions per week)  
6  
7 450 compared to studies in outpatient settings, and a high amount of supervised exercise, which  
8  
9 451 should provide good adherence and fidelity. Having a therapist as a supervisor is especially  
10  
11 452 important for a rather complex type of exercise as is MAT. For example, there are no simple  
12  
13 453 ‘numbers’ like sets or repetitions one can follow. Quicker movements relating to agility, like  
14  
15 454 changes of direction, acceleration, and deceleration, frequently lie outside the ‘comfort zone’  
16  
17 455 of pwMS, which necessitates guidance of a therapist. Lastly, in the group format, a therapist is  
18  
19 456 mandatory to provide modifications for pwMS with higher disability or very low disability.  
20  
21 457 We also anticipate certain issues in conducting this study. For example, scheduling of  
22  
23 458 appointments for testing will be challenging, as there will be several testing blocks (i.e., motor  
24  
25 459 function, GXT, cognitive tests, interview), conducted in different departments of the NRC,  
26  
27 460 which must be fitted into certain timeslots around admission and discharge. These  
28  
29 461 appointments will compete against other study unrelated appointments (e.g., ward rounds,  
30  
31 462 urology assessments, etc.). Regarding the eligibility and randomization criteria, it will be  
32  
33 463 challenging to have all the correct data within the first two days as there can be delays in the  
34  
35 464 admission process. Intervention duration can be regarded as a general limitation of this project,  
36  
37 465 as it is restricted to the usual inpatient stay for this group of patients in the German national  
38  
39 466 health care system (i.e., four to six weeks). Land- and water-based MAT might have different  
40  
41 467 mechanisms of action, especially when considering the effect of body temperature on  
42  
43 468 demyelinated axons, and the cooling effect present in water[60]. Still, water-based MAT was  
44  
45 469 developed to allow for a greater amount of standardized MAT therapy time. As inpatients must  
46  
47 470 receive a certain amount of therapy time during their stay, not including water-based MAT  
48  
49 471 would have resulted in a greater amount of uncontrolled therapy in the intervention group. In  
50  
51  
52  
53  
54  
55  
56  
57  
58  
59  
60

1  
2  
3 472 a main trial this would only permit conclusions to be drawn on the treatment effect of  
4  
5 473 concomitant land- and water-based MAT.

6  
7  
8 474 Lastly, analysis of blood-based biomarkers is planned to be part of the ReFEx study project.  
9  
10 475 However, as these outcomes are connected to comparably high costs for materials and analysis,  
11  
12 476 addition of blood sampling is postponed to the start of a full RCT. Nevertheless, information  
13  
14 477 gathered during the feasibility study will be used to allow for smooth integration of blood draws  
15  
16  
17 478 and storage during assessments at admission and discharge. As the blood draws can be regarded  
18  
19 479 as the most unpleasant part of the assessments for patients, feasibility of the interventions and  
20  
21 480 patient acceptance should be established first.  
22

23  
24 481

#### 25 26 482 **Author contributions**

27  
28 483 FW, JN, ME, PZ designed the overall study. FW & JN designed the feasibility study and wrote  
29  
30 484 the protocol. FW, JN, JS, EH implemented the screening and assessment procedures. JS, EH,  
31  
32 485 ME, AKF, HK, PZ revised the manuscript. All authors read and approved the final manuscript.  
33  
34

35 486

#### 36 37 487 **Funding**

38  
39  
40 488 This work is supported by the Internal Research Funds of the German Sport University  
41  
42 489 Cologne, Cologne, Germany, grant agreement number L-11-10011-238-102000.  
43

44  
45 490

#### 46 47 491 **Competing interests**

48  
49 492 FW: none. JN: none. JS: none. EH: none. ME: none. AKF has received grants from the German  
50  
51 493 Parkinson Society and the German Alzheimer's Society, as well as honoraria from ProLog  
52  
53 494 Wissen GmbH, Cologne, Germany, pro auditio Switzerland, Zürich, Switzerland, Seminar- und  
54  
55 495 Fortbildungszentrum Rheine, Germany, and LOGOMANIA, Fendt & Sax GbR, Munich,  
56  
57  
58  
59  
60

1  
2  
3 496 Germany. AFK is author of the cognitive training program NEUROvitalis but receives no  
4  
5 497 corresponding honoraria. HK: none. PZ: none.  
6  
7

8 498

9  
10 499 **REFERENCES**

11  
12 500 1. Sander C, Voelter H-U, Schlake H-P, et al. Assessment of Fatigue in Multiple Sclerosis.  
13  
14 501 *Neurology International Open* 2017;1(02):E79-E85. doi: 10.1055/s-0043-104752

15  
16 502 2. Rommer PS, Eichstadt K, Ellenberger D, et al. Symptomatology and symptomatic treatment  
17  
18 503 in multiple sclerosis: Results from a nationwide MS registry. *Mult Scler* 2019;25(12):1641-52.  
19  
20 504 doi: 10.1177/1352458518799580 [published Online First: 2018/09/20]

21  
22 505 3. Barin L, Salmen A, Disanto G, et al. The disease burden of Multiple Sclerosis from the  
23  
24 506 individual and population perspective: Which symptoms matter most? *Mult Scler Relat Disord*  
25  
26 507 2018;25:112-21. doi: 10.1016/j.msard.2018.07.013 [published Online First: 2018/07/31]

27  
28 508 4. Kobelt G, Langdon D, Jönsson L. The effect of self-assessed fatigue and subjective cognitive  
29  
30 509 impairment on work capacity: The case of multiple sclerosis. *Mult Scler* 2019;25(5):740-49.  
31  
32 510 doi: 10.1177/1352458518769837 [published Online First: 20180417]

33  
34 511 5. Nielsen J, Schnell R, Markett S, et al. Are “invisible MS symptoms” (fatigue, cognitive  
35  
36 512 dysfunction, depression) significant in the professional performance assessment of multiple  
37  
38 513 sclerosis patients two years after the inpatient primary evaluation? *Zeitschrift für*  
39  
40 514 *Neuropsychologie* 2020;31(1):11-25. doi: 10.1024/1016-264X/a000280

41  
42 515 6. Manjaly ZM, Harrison NA, Critchley HD, et al. Pathophysiological and cognitive  
43  
44 516 mechanisms of fatigue in multiple sclerosis. *J Neurol Neurosurg Psychiatry* 2019;90(6):642-  
45  
46 517 51. doi: 10.1136/jnnp-2018-320050 [published Online First: 20190125]

47  
48 518 7. Kluger BM, Krupp LB, Enoka RM. Fatigue and fatigability in neurologic illnesses: proposal  
49  
50 519 for a unified taxonomy. *Neurology* 2013;80(4):409-16. doi: 10.1212/WNL.0b013e31827f07be  
51  
52 520 [published Online First: 2013/01/23]

- 1  
2  
3 521 8. Behrens M, Broscheid K-C, Schega L. Taxonomie und Determinanten motorischer  
4  
5 522 Performance Fatigability bei Multipler Sklerose [Taxonomy and determinants of motor  
6  
7 523 performance fatigability in multiple sclerosis]. *Neurologie und Rehabilitation* 2021;27:3-12.  
8  
9 524 doi: 10.14624/NR2101001
- 10  
11  
12 525 9. Loy BD, Taylor RL, Fling BW, et al. Relationship between perceived fatigue and  
13  
14 526 performance fatigability in people with multiple sclerosis: A systematic review and meta-  
15  
16 527 analysis. *J Psychosom Res* 2017;100:1-7. doi: 10.1016/j.jpsychores.2017.06.017 [published  
17  
18 528 Online First: 2017/08/10]
- 19  
20  
21 529 10. Langeskov-Christensen M, Bisson EJ, Finlayson ML, et al. Potential pathophysiological  
22  
23 530 pathways that can explain the positive effects of exercise on fatigue in multiple sclerosis: A  
24  
25 531 scoping review. *J Neurol Sci* 2017;373:307-20. doi: 10.1016/j.jns.2017.01.002 [published  
26  
27 532 Online First: 2017/01/31]
- 28  
29  
30 533 11. Moss-Morris R, Harrison AM, Safari R, et al. Which behavioural and exercise interventions  
31  
32 534 targeting fatigue show the most promise in multiple sclerosis? A systematic review with  
33  
34 535 narrative synthesis and meta-analysis. *Behav Res Ther* 2021;137:103464. doi:  
35  
36 536 10.1016/j.brat.2019.103464 [published Online First: 2019/11/30]
- 37  
38  
39 537 12. Motl RW, Sandroff BM, Kwakkel G, et al. Exercise in patients with multiple sclerosis. *The*  
40  
41 538 *Lancet Neurology* 2017;16(10):848-56. doi: 10.1016/s1474-4422(17)30281-8
- 42  
43  
44 539 13. Wolf F, Rademacher A, Joisten N, et al. The aerobic capacity – fatigue relationship in  
45  
46 540 persons with Multiple Sclerosis is not reproducible in a pooled analysis of two randomized  
47  
48 541 controlled trials. *Multiple Sclerosis and Related Disorders* 2022;58:103476. doi:  
49  
50 542 <https://doi.org/10.1016/j.msard.2021.103476>
- 51  
52  
53 543 14. Tholen R, Dettmers C, Henze T, et al. Bewegungstherapie zur Verbesserung der Mobilität  
54  
55 544 von Patienten mit Multipler Sklerose : Konsensusfassung für die S2e-Leitlinie der DGNR in



- 1  
2  
3 545 Zusammenarbeit mit Physio Deutschland – Deutscher Verband für Physiotherapie (ZVK) e.  
4  
5 546 *V. Neurologie und Rehabilitation* 2019;25(1):3-40. doi: 10.14624/NR1902001  
6  
7  
8 547 15. Donath L, van Dieen J, Faude O. Exercise-Based Fall Prevention in the Elderly: What  
9  
10 548 About Agility? *Sports Med* 2016;46(2):143-9. doi: 10.1007/s40279-015-0389-5 [published  
11  
12 549 Online First: 2015/09/24]  
13  
14  
15 550 16. Morat M, Morat T, Zijlstra W, et al. Effects of multimodal agility-like exercise training  
16  
17 551 compared to inactive controls and alternative training on physical performance in older adults:  
18  
19 552 a systematic review and meta-analysis. *Eur Rev Aging Phys Act* 2021;18(1):4. doi:  
20  
21 553 10.1186/s11556-021-00256-y [published Online First: 20210225]  
22  
23  
24 554 17. Motl RW, Sandroff BM, DeLuca J. Exercise Training and Cognitive Rehabilitation: A  
25  
26 555 Symbiotic Approach for Rehabilitating Walking and Cognitive Functions in Multiple  
27  
28 556 Sclerosis? *Neurorehabil Neural Repair* 2016;30(6):499-511. doi: 10.1177/1545968315606993  
29  
30 557 [published Online First: 2016/06/05]  
31  
32  
33 558 18. Callesen J, Cattaneo D, Brincks J, et al. How do resistance training and balance and motor  
34  
35 559 control training affect gait performance and fatigue impact in people with multiple sclerosis?  
36  
37 560 A randomized controlled multi-center study. *Mult Scler* 2020;26(11):1420-32. doi:  
38  
39 561 10.1177/1352458519865740 [published Online First: 20190724]  
40  
41  
42 562 19. Hebert JR, Corboy JR. The association between multiple sclerosis-related fatigue and  
43  
44 563 balance as a function of central sensory integration. *Gait Posture* 2013;38(1):37-42. doi:  
45  
46 564 10.1016/j.gaitpost.2012.10.015 [published Online First: 20121128]  
47  
48  
49 565 20. Hebert JR, Corboy JR, Manago MM, et al. Effects of vestibular rehabilitation on multiple  
50  
51 566 sclerosis-related fatigue and upright postural control: a randomized controlled trial. *Phys Ther*  
52  
53 567 2011;91(8):1166-83. doi: 10.2522/ptj.20100399 [published Online First: 20110616]  
54  
55  
56  
57  
58  
59  
60

- 1  
2  
3 568 21. Hebert JR, Corboy JR, Vollmer T, et al. Efficacy of Balance and Eye-Movement Exercises  
4  
5 569 for Persons With Multiple Sclerosis (BEEMS). *Neurology* 2018;90(9):e797-e807. doi:  
6  
7 570 10.1212/WNL.0000000000005013 [published Online First: 2018/02/02]  
8  
9  
10 571 22. Wright MT. Was ist Partizipative Gesundheitsforschung? *Prävention und*  
11  
12 572 *Gesundheitsförderung* 2013;8(3):122-31. doi: 10.1007/s11553-013-0395-0  
13  
14 573 23. Scott NW, McPherson GC, Ramsay CR, et al. The method of minimization for allocation  
15  
16 574 to clinical trials: a review. *Controlled Clinical Trials* 2002;23(6):662-74. doi:  
17  
18 575 [https://doi.org/10.1016/S0197-2456\(02\)00242-8](https://doi.org/10.1016/S0197-2456(02)00242-8)  
19  
20  
21 576 24. Charlesworth G, Burnell K, Hoe J, et al. Acceptance checklist for clinical effectiveness  
22  
23 577 pilot trials: a systematic approach. *BMC Med Res Methodol* 2013;13:78. doi: 10.1186/1471-  
24  
25 578 2288-13-78 [published Online First: 20130613]  
26  
27  
28 579 25. Ladlow P, Coppack RJ, Dharm-Datta S, et al. The effects of low-intensity blood flow  
29  
30 580 restricted exercise compared with conventional resistance training on the clinical outcomes of  
31  
32 581 active UK military personnel following a 3-week in-patient rehabilitation programme: protocol  
33  
34 582 for a randomized controlled feasibility study. *Pilot Feasibility Stud* 2017;3:71. doi:  
35  
36 583 10.1186/s40814-017-0216-x [published Online First: 20171208]  
37  
38  
39 584 26. Zimmer P, Bloch W, Schenk A, et al. High-intensity interval exercise improves cognitive  
40  
41 585 performance and reduces matrix metalloproteinases-2 serum levels in persons with multiple  
42  
43 586 sclerosis: A randomized controlled trial. *Mult Scler* 2018;24(12):1635-44. doi:  
44  
45 587 10.1177/1352458517728342 [published Online First: 2017/08/22]  
46  
47  
48 588 27. Voigt-Radloff S, Stemmer R, Korporal J, et al. Forschung zu komplexen Interventionen in  
49  
50 589 der Pflege- und Hebammenwissenschaft und in den Wissenschaften der Physiotherapie,  
51  
52 590 Ergotherapie und Logopädie: ein forschungsmethodischer Leitfaden zur Ermittlung,  
53  
54 591 Evaluation und Implementation evidenzbasierter Innovationen; Version 2. 2016 doi:  
55  
56 592 10.6094/UNIFR/10702  
57  
58  
59  
60

- 1  
2  
3 593 28. Page P, Hoogenboom B, Voight M. IMPROVING THE REPORTING OF  
4  
5 594 THERAPEUTIC EXERCISE INTERVENTIONS IN REHABILITATION RESEARCH. *Int J*  
6  
7 595 *Sports Phys Ther* 2017;12(2):297-304.
- 8  
9  
10 596 29. Kalb R, Brown TR, Coote S, et al. Exercise and lifestyle physical activity recommendations  
11  
12 597 for people with multiple sclerosis throughout the disease course. *Mult Scler* 2020;26(12):1459-  
13  
14 598 69. doi: 10.1177/1352458520915629 [published Online First: 2020/04/24]
- 15  
16  
17 599 30. Nielsen JB, Willerslev-Olsen M, Christiansen L, et al. Science-based neurorehabilitation:  
18  
19 600 recommendations for neurorehabilitation from basic science. *J Mot Behav* 2015;47(1):7-17.  
20  
21 601 doi: 10.1080/00222895.2014.931273
- 22  
23  
24 602 31. Thabane L, Ma J, Chu R, et al. A tutorial on pilot studies: the what, why and how. *BMC*  
25  
26 603 *Med Res Methodol* 2010;10:1. doi: 10.1186/1471-2288-10-1 [published Online First:  
27  
28 604 20100106]
- 29  
30  
31 605 32. Learmonth YC, Motl RW. Important considerations for feasibility studies in physical  
32  
33 606 activity research involving persons with multiple sclerosis: a scoping systematic review and  
34  
35 607 case study. *Pilot Feasibility Stud* 2018;4:1. doi: 10.1186/s40814-017-0145-8 [published Online  
36  
37 608 First: 20170609]
- 38  
39  
40 609 33. Hubbard EA, Motl RW, Elmer DJ. Feasibility and initial efficacy of a high-intensity  
41  
42 610 interval training program using adaptive equipment in persons with multiple sclerosis who have  
43  
44 611 walking disability: study protocol for a single-group, feasibility trial. *Trials* 2020;21(1):972.  
45  
46 612 doi: 10.1186/s13063-020-04887-x [published Online First: 20201125]
- 47  
48  
49 613 34. Foster C, Florhaug JA, Franklin J, et al. A new approach to monitoring exercise training. *J*  
50  
51 614 *Strength Cond Res* 2001;15(1):109-15.
- 52  
53  
54 615 35. Haddad M, Stylianides G, Djaoui L, et al. Session-RPE Method for Training Load  
55  
56 616 Monitoring: Validity, Ecological Usefulness, and Influencing Factors. *Front Neurosci*  
57  
58 617 2017;11:612. doi: 10.3389/fnins.2017.00612 [published Online First: 20171102]  
59  
60

- 1  
2  
3 618 36. Gooßes M, Saliger J, Folkerts A-K, et al. Feasibility of Music-Assisted Treadmill Training  
4  
5 619 in Parkinson's Disease Patients With and Without Deep Brain Stimulation: Insights From an  
6  
7 620 Ongoing Pilot Randomized Controlled Trial. *Frontiers in Neurology* 2020;11(790) doi:  
8  
9 621 10.3389/fneur.2020.00790  
10  
11  
12 622 37. Hersche R, Weise A, Michel G, et al. Three-week inpatient energy management education  
13  
14 623 (IEME) for persons with multiple sclerosis-related fatigue: Feasibility of a randomized clinical  
15  
16 624 trial. *Mult Scler Relat Disord* 2019;35:26-33. doi: 10.1016/j.msard.2019.06.034 [published  
17  
18 625 Online First: 20190629]  
19  
20  
21 626 38. Flachenecker P, Muller G, Konig H, et al. ["Fatigue" in multiple sclerosis. Development  
22  
23 627 and and validation of the "Wurzburger Fatigue Inventory for MS"]. *Nervenarzt*  
24  
25 628 2006;77(2):165-6, 68-70, 72-4. doi: 10.1007/s00115-005-1990-x  
26  
27  
28 629 39. Penner IK, Raselli C, Stocklin M, et al. The Fatigue Scale for Motor and Cognitive  
29  
30 630 Functions (FSMC): validation of a new instrument to assess multiple sclerosis-related fatigue.  
31  
32 631 *Mult Scler* 2009;15(12):1509-17. doi: 10.1177/1352458509348519 [published Online First:  
33  
34 632 2009/12/10]  
35  
36  
37 633 40. Dettmers C, Marchione S, Weimer-Jaekel A, et al. Cognitive Fatigability, not Fatigue  
38  
39 634 predicts employment status in patients with MS three months after rehabilitation. *Mult Scler*  
40  
41 635 *Relat Disord* 2021;56:103215. doi: 10.1016/j.msard.2021.103215 [published Online First:  
42  
43 636 20210819]  
44  
45  
46 637 41. Van Geel F, Veldkamp R, Severijns D, et al. Day-to-day reliability, agreement and  
47  
48 638 discriminative validity of measuring walking-related performance fatigability in persons with  
49  
50 639 multiple sclerosis. *Mult Scler* 2020;26(13):1785-89. doi: 10.1177/1352458519872465  
51  
52 640 [published Online First: 20190909]  
53  
54  
55  
56  
57  
58  
59  
60

- 1  
2  
3 641 42. Costa SL, Genova HM, DeLuca J, et al. Information processing speed in multiple sclerosis:  
4  
5 642 Past, present, and future. *Mult Scler* 2017;23(6):772-89. doi: 10.1177/1352458516645869  
6  
7 643 [published Online First: 20160509]  
8  
9  
10 644 43. Motl RW, Cohen JA, Benedict R, et al. Validity of the timed 25-foot walk as an ambulatory  
11  
12 645 performance outcome measure for multiple sclerosis. *Multiple sclerosis (Houndmills,*  
13  
14 646 *Basingstoke, England)* 2017;23(5):704-10. doi: 10.1177/1352458517690823  
15  
16  
17 647 44. Nieuwenhuis MM, Van Tongeren H, Sørensen PS, et al. The six spot step test: a new  
18  
19 648 measurement for walking ability in multiple sclerosis. *Mult Scler* 2006;12(4):495-500. doi:  
20  
21 649 10.1191/1352458506ms1293oa  
22  
23  
24 650 45. Thieme H, Ritschel C, Zange C. Functional Gait Assessment – deutsche Version.  
25  
26 651 *Physioscience* 2009;5:5-11.  
27  
28 652 46. Schott N. [German adaptation of the "Activities-Specific Balance Confidence (ABC) scale"  
29  
30 653 for the assessment of falls-related self-efficacy]. *Z Gerontol Geriatr* 2008;41(6):475-85. doi:  
31  
32 654 10.1007/s00391-007-0504-9  
33  
34  
35 655 47. Hautzinger M, Bailer M. Allgemeine Depressions Skala. Die deutsche Version des CES-  
36  
37 656 D. Weinheim: Beltz 1993.  
38  
39  
40 657 48. Flachenecker P, Bures AK, Gawlik A, et al. Efficacy of an Internet-Based Program to  
41  
42 658 Promote Physical Activity and Exercise after Inpatient Rehabilitation in Persons with Multiple  
43  
44 659 Sclerosis: A Randomized, Single-Blind, Controlled Study. *Int J Environ Res Public Health*  
45  
46 660 2020;17(12) doi: 10.3390/ijerph17124544 [published Online First: 20200624]  
47  
48  
49 661 49. Flachenecker P, König H, Meissner H, et al. Fatigue in multiple sclerosis: Validation of the  
50  
51 662 WEIMuS scale ("Würzburger Erschöpfungs-Inventar bei Multipler Sklerose"). *Neurologie und*  
52  
53 663 *Rehabilitation* 2008;14:299-306.  
54  
55  
56  
57  
58  
59  
60

- 1  
2  
3 664 50. Leon AC, Davis LL, Kraemer HC. The role and interpretation of pilot studies in clinical  
4  
5 665 research. *Journal of psychiatric research* 2011;45(5):626-29. doi:  
6  
7 666 10.1016/j.jpsychires.2010.10.008 [published Online First: 2010/10/28]  
8  
9  
10 667 51. Sim J. Should treatment effects be estimated in pilot and feasibility studies? *Pilot*  
11  
12 668 *Feasibility Stud* 2019;5:107. doi: 10.1186/s40814-019-0493-7 [published Online First:  
13  
14 669 20190828]  
15  
16  
17 670 52. Kistin C, Silverstein M. Pilot Studies: A Critical but Potentially Misused Component of  
18  
19 671 Interventional Research. *JAMA* 2015;314(15):1561-2. doi: 10.1001/jama.2015.10962  
20  
21 672 53. Kuckartz U. Qualitative Inhaltsanalyse. Methoden, Praxis, Computerunterstützung, Beltz  
22  
23 673 Verlagsgruppe: Weinheim, 2018.  
24  
25  
26 674 54. Gunn H, Andrade J, Paul L, et al. Balance Right in Multiple Sclerosis (BRiMS): a guided  
27  
28 675 self-management programme to reduce falls and improve quality of life, balance and mobility  
29  
30 676 in people with secondary progressive multiple sclerosis: a protocol for a feasibility randomised  
31  
32 677 controlled trial. *Pilot Feasibility Stud* 2018;4:26. doi: 10.1186/s40814-017-0168-1 [published  
33  
34 678 Online First: 20170727]  
35  
36  
37 679 55. Learmonth YC, Kinnett-Hopkins D, Motl RW. Capitalising on the opinions of persons with  
38  
39 680 multiple sclerosis to inform the main trial – participant opinions from participation in a  
40  
41 681 feasibility study, a qualitative extension study. *Disability and Rehabilitation*  
42  
43 682 2019;41(25):3071-78. doi: 10.1080/09638288.2018.1490823  
44  
45  
46  
47 683 56. O'Cathain A, Hoddinott P, Lewin S, et al. Maximising the impact of qualitative research in  
48  
49 684 feasibility studies for randomised controlled trials: guidance for researchers. *Pilot Feasibility*  
50  
51 685 *Stud* 2015;1:32. doi: 10.1186/s40814-015-0026-y [published Online First: 20150907]  
52  
53  
54 686 57. Smith M, Williams G, Barker R. Finding the right balance with participation in exercise  
55  
56 687 and sport for individuals with multiple sclerosis: protocol for a pre and post intervention  
57  
58  
59  
60

1  
2  
3 688 feasibility study. *BMJ Open* 2020;10(3):e035378. doi: 10.1136/bmjopen-2019-035378

4  
5 689 [published Online First: 20200318]

6  
7  
8 690 58. Flick U. *Qualitative Sozialforschung: eine Einführung* (6. Auflage, Originalausgabe.).

9  
10 691 *Reinbek bei Hamburg: rowohlts enzyklopädie im Rowohlt Taschenbuch Verlag* 2014

11  
12 692 59. Rädiker S, Kuckartz U. *Analyse qualitativer Daten mit MAXQDA: Text, Audio und Video.*

13  
14 693 Wiesbaden: Springer VS 2019.

15  
16 694 60. Frohman AN, Okuda DT, Beh S, et al. Aquatic training in MS: neurotherapeutic impact

17  
18 695 upon quality of life. *Ann Clin Transl Neurol* 2015;2(8):864-72. doi: 10.1002/acn3.220

19  
20 696 [published Online First: 20150626]

21  
22 697

23  
24 698

25  
26 699

27  
28 700 I, the Submitting Author has the right to grant and does grant on behalf of all authors of the  
29 701 Work (as defined in the below author licence), an exclusive licence and/or a non-exclusive  
30 702 licence for contributions from authors who are: i) UK Crown employees; ii) where BMJ has  
31 703 agreed a CC-BY licence shall apply, and/or iii) in accordance with the terms applicable for US  
32 704 Federal Government officers or employees acting as part of their official duties; on a  
33 705 worldwide, perpetual, irrevocable, royalty-free basis to BMJ Publishing Group Ltd ("BMJ")  
34 706 its licensees and where the relevant Journal is co-owned by BMJ to the co-owners of the  
35 707 Journal, to publish the Work in BMJ Open and any other BMJ products and to exploit all rights,  
36 708 as set out in our licence.

37  
38 709

**ReFEx Strength Protocol**

|                                                                                                                                                                            |                                                                                                                             |                                                                                                                                                                                                   |  |
|----------------------------------------------------------------------------------------------------------------------------------------------------------------------------|-----------------------------------------------------------------------------------------------------------------------------|---------------------------------------------------------------------------------------------------------------------------------------------------------------------------------------------------|--|
| <b>Principles:</b>                                                                                                                                                         |                                                                                                                             | <b>Intensity:</b>                                                                                                                                                                                 |  |
| <ul style="list-style-type: none"> <li>• Frequency: 3x/week</li> <li>• Focus on leg strength/no balance training</li> <li>• 5min warm-up, 3-4 exercises/session</li> </ul> |                                                                                                                             | <ul style="list-style-type: none"> <li>• Session 1-5: 3x10 repetitions at 15 RPM</li> <li>• Session 6 to T<sub>1</sub>: 3x12 repetitions at 12 RPM</li> <li>• Break between sets: 1min</li> </ul> |  |
| <b>Session-RPE:</b>                                                                                                                                                        |                                                                                                                             |                                                                                                                                                                                                   |  |
| At the end of every training the participant is requested to provide a rating on perceived exertion (i.e., session-RPE) for the complete session                           |                                                                                                                             |                                                                                                                                                                                                   |  |
| <b>Warm-up (5min):</b>                                                                                                                                                     |                                                                                                                             |                                                                                                                                                                                                   |  |
| <ul style="list-style-type: none"> <li>• Participants can choose between treadmill, cross trainer, stepper, and recumbent stepper</li> </ul>                               |                                                                                                                             |                                                                                                                                                                                                   |  |
| <b>Exercise pool:</b>                                                                                                                                                      |                                                                                                                             |                                                                                                                                                                                                   |  |
| Always determine 15RPM before starting a new exercise!                                                                                                                     |                                                                                                                             |                                                                                                                                                                                                   |  |
| <b>1 hip</b>                                                                                                                                                               |                                                                                                                             |                                                                                                                                                                                                   |  |
| a) Extension<br>Leg press (upper body upright) <ul style="list-style-type: none"> <li>• Start: hip angle as small as possible</li> </ul>                                   | b) Flexion<br>Standing knee raises (cable) <ul style="list-style-type: none"> <li>• With balance support (chair)</li> </ul> | c) Abduction<br>Standing abduction (cable) <ul style="list-style-type: none"> <li>• With balance support</li> </ul>                                                                               |  |
| <b>2 knee</b>                                                                                                                                                              |                                                                                                                             |                                                                                                                                                                                                   |  |
| a) Extension<br>Leg press (supine)                                                                                                                                         | b) Flexion<br>Prone leg curls (cable) <ul style="list-style-type: none"> <li>• End: &gt;90° flexion</li> </ul>              |                                                                                                                                                                                                   |  |
| <b>3 foot</b>                                                                                                                                                              |                                                                                                                             |                                                                                                                                                                                                   |  |
| a) Plantar flexion<br>Calf raises on leg press <ul style="list-style-type: none"> <li>• Large ankle ROM</li> </ul>                                                         |                                                                                                                             |                                                                                                                                                                                                   |  |

RPM = Repetition maximum; RPE = Rated perceived exertion; ROM = Range of motion



Manual for the land-based and water-based MAT (adapted from<sup>1</sup>)

1. Land-based MAT

|                                                               |                                                  |                                           |           |
|---------------------------------------------------------------|--------------------------------------------------|-------------------------------------------|-----------|
| <b>Standing balance</b>                                       |                                                  |                                           | <b>SB</b> |
| <i>Participants perform various exercises while standing.</i> |                                                  |                                           |           |
| Progression: BOS                                              | Progression: Catching & Throwing                 | Progression: Tools                        |           |
| Narrow BOS                                                    | Alone                                            | Number of objects for throwing            |           |
| Semi-tandem stance                                            | With partner                                     | Kind of objects (small sacks, balls, ...) |           |
| Tandem stance                                                 |                                                  |                                           |           |
| One leg stance (+movements of opposite leg)                   |                                                  |                                           |           |
| Half kneeling                                                 |                                                  |                                           |           |
| Sensory modification                                          | Visual: closed eyes                              |                                           |           |
|                                                               | Somatosensory: various unstable support surfaces |                                           |           |
|                                                               | Vestibular: head turns (horizontal, vertical)    |                                           |           |
| Cognitive add-on                                              | -                                                |                                           |           |

|                                                                                                                                                               |                                                  |  |           |
|---------------------------------------------------------------------------------------------------------------------------------------------------------------|--------------------------------------------------|--|-----------|
| <b>"Chaosball"</b>                                                                                                                                            |                                                  |  | <b>SB</b> |
| <i>An object (e.g. ball) is passed in a group in a certain sequence, participants follow the sequence and recall certain attributes of the group members.</i> |                                                  |  |           |
| Progression: Number of sequences/objects                                                                                                                      |                                                  |  |           |
| 1 sequence (= 1 object)                                                                                                                                       |                                                  |  |           |
| Switching: 2 sequences (= 2 objects)                                                                                                                          |                                                  |  |           |
| Simultaneously: 2 sequences (= 2 objects)                                                                                                                     |                                                  |  |           |
| Simultaneously: 3 sequences (= 3 objects)                                                                                                                     |                                                  |  |           |
| Sensory modification                                                                                                                                          | Visual: -                                        |  |           |
|                                                                                                                                                               | Somatosensory: various unstable support surfaces |  |           |
|                                                                                                                                                               | Vestibular: -                                    |  |           |
| Cognitive add-on (main focus)                                                                                                                                 | Memory: Recall orders                            |  |           |
|                                                                                                                                                               | Divided attention: more than one object          |  |           |

|                                                        |                                                                                                   |                                |           |
|--------------------------------------------------------|---------------------------------------------------------------------------------------------------|--------------------------------|-----------|
| <b>Balancing on lines</b>                              |                                                                                                   |                                | <b>DB</b> |
| <i>Participants follow the lines on the gym floor.</i> |                                                                                                   |                                |           |
| Progression: BOS, DOM                                  | Progression: Movement                                                                             | Progression: Speed of movement |           |
| Narrow gait                                            | High knees                                                                                        | Slow swing phase (e.g., 3s)    |           |
| Tandem gait                                            | Lunges                                                                                            |                                |           |
| Forwards, backwards                                    |                                                                                                   |                                |           |
| Sensory modification                                   | Visual: Perform several steps with eyes closed                                                    |                                |           |
|                                                        | Somatosensory: -                                                                                  |                                |           |
|                                                        | Vestibular: Upper body & head turns                                                               |                                |           |
| Cognitive add-on                                       | Double-task: Pairs of two, trailing partner gives commands for stops or turns for leading partner |                                |           |
|                                                        | Double-task: Pairs of two, trailing partner has to move synchronously with leading partner        |                                |           |

|                                                     |                                                         |                      |           |
|-----------------------------------------------------|---------------------------------------------------------|----------------------|-----------|
| <b>Stepping</b>                                     |                                                         |                      | <b>DB</b> |
| <i>Participants perform various forms of steps.</i> |                                                         |                      |           |
| Progression: DOM                                    | Progression: Movement                                   | Progression: Tools   |           |
| Forwards, backwards, sideways                       | High knees                                              | Stepping out of hoop |           |
| Combination of directions                           | Lunges                                                  |                      |           |
|                                                     | Floor "touches"                                         |                      |           |
| Sensory modification                                | Visual: closed eyes                                     |                      |           |
|                                                     | Somatosensory: Various unstable support surfaces        |                      |           |
|                                                     | Vestibular: Head turns (horizontal, vertical, diagonal) |                      |           |
| Cognitive add-on                                    | Memory: Each direction gets a number (e.g. front = 1)   |                      |           |

|                                                                                                                             |                                                  |                                           |           |
|-----------------------------------------------------------------------------------------------------------------------------|--------------------------------------------------|-------------------------------------------|-----------|
| <b>"Transport chain"</b>                                                                                                    |                                                  |                                           | <b>DB</b> |
| <i>Over 5-10m each participant follows a line, but after each collective step an object is "transported" (e.g. thrown).</i> |                                                  |                                           |           |
| Progression: BOS, DOM                                                                                                       | Progression: Movement                            | Progression: Tools                        |           |
| Narrow gait                                                                                                                 | High knees                                       | Number of tools to be thrown              |           |
| Tandem gait                                                                                                                 | Lunges                                           | Kind of objects (small sacks, balls, ...) |           |
| forwards, backwards                                                                                                         |                                                  |                                           |           |
| Sensory modification                                                                                                        | Visual: -                                        |                                           |           |
|                                                                                                                             | Somatosensory: -                                 |                                           |           |
|                                                                                                                             | Vestibular: Upper body & head turns (horizontal) |                                           |           |
| Cognitive add-on                                                                                                            | -                                                |                                           |           |

|                                                                                                                                                       |                                                                                              |                                 |           |
|-------------------------------------------------------------------------------------------------------------------------------------------------------|----------------------------------------------------------------------------------------------|---------------------------------|-----------|
| <b>"Commander"</b>                                                                                                                                    |                                                                                              |                                 | <b>DB</b> |
| <i>Pairs of two: one participant has to react to the commands of the other. Commands are different combinations of a step and simultaneous catch.</i> |                                                                                              |                                 |           |
| Progression: Movement                                                                                                                                 | Progression: Starting position                                                               | Progression: Number of commands |           |
| Tasks for one side of body                                                                                                                            | On the floor                                                                                 | 2 to 8                          |           |
| Tasks for both sides of body (e.g. step left, catch right)                                                                                            | On the floor but inside a hoop                                                               |                                 |           |
|                                                                                                                                                       | On unstable support surface                                                                  |                                 |           |
|                                                                                                                                                       | 180° turn before step and catch                                                              |                                 |           |
| Sensory modification                                                                                                                                  | Visual: closed eyes (starting position)                                                      |                                 |           |
|                                                                                                                                                       | Somatosensory: Various unstable support surfaces (starting position)                         |                                 |           |
|                                                                                                                                                       | Vestibular: 180° turns before catch                                                          |                                 |           |
| Cognitive add-on (main focus)                                                                                                                         | Memory: Recall pairs (movement+number / movement+color word / movement+number or color word) |                                 |           |
|                                                                                                                                                       | Inhibition: command = stay in place                                                          |                                 |           |
|                                                                                                                                                       | Reaction: commander minimizes time to react                                                  |                                 |           |

|    |                                                                                                                                                              |                                                                                                                                                      |                                                     |
|----|--------------------------------------------------------------------------------------------------------------------------------------------------------------|------------------------------------------------------------------------------------------------------------------------------------------------------|-----------------------------------------------------|
| 1  | <b>"Movement memory"</b> <span style="float: right;">DB</span>                                                                                               |                                                                                                                                                      |                                                     |
| 2  | <i>Participants move through the gym while performing gait variations coded with various commands given by therapist.</i>                                    |                                                                                                                                                      |                                                     |
| 3  | Progression: Movement                                                                                                                                        | Progression: Number of pairs                                                                                                                         |                                                     |
| 4  | Tasks for one side of body                                                                                                                                   | 4 to 8                                                                                                                                               |                                                     |
| 5  | Tasks for both sides of body (e.g. left knee up & right hand to left shoulder)                                                                               |                                                                                                                                                      |                                                     |
| 6  | Similarity of movements                                                                                                                                      |                                                                                                                                                      |                                                     |
| 7  | Sensory modification                                                                                                                                         | Visual: -<br>Somatosensory: -<br>Vestibular: -                                                                                                       |                                                     |
| 8  | Cognitive add-on (main focus)                                                                                                                                | Memory: Recall pairs (movement+number / movement+color word / movement+number or color word)<br>Inhibition: command = stop                           |                                                     |
| 9  |                                                                                                                                                              |                                                                                                                                                      |                                                     |
| 10 |                                                                                                                                                              |                                                                                                                                                      |                                                     |
| 11 | <b>"Remote control"</b> <span style="float: right;">DB</span>                                                                                                |                                                                                                                                                      |                                                     |
| 12 | <i>Pairs of two: a participant is steered through the room with closed eyes via tactile cues of the partner.</i>                                             |                                                                                                                                                      |                                                     |
| 13 | Progression: number of cues                                                                                                                                  | Progression: movement                                                                                                                                |                                                     |
| 14 | 3 to 6                                                                                                                                                       | Tandem walk, high knees                                                                                                                              |                                                     |
| 15 | Sensory modification                                                                                                                                         | Visual: closed eyes<br>Somatosensory: -<br>Vestibular: turning in place                                                                              |                                                     |
| 16 | Cognitive add-on                                                                                                                                             | Spatial orientation: report location in space to partner (closed eyes)                                                                               |                                                     |
| 17 |                                                                                                                                                              |                                                                                                                                                      |                                                     |
| 18 |                                                                                                                                                              |                                                                                                                                                      |                                                     |
| 19 | <b>Walking with tasks</b> <span style="float: right;">AG</span>                                                                                              |                                                                                                                                                      |                                                     |
| 20 | <i>Each participant performs various tasks (e.g. touch opposite knee while throwing an object left to right) while walking back and forth on a 20m lane.</i> |                                                                                                                                                      |                                                     |
| 21 | Progression: DOM, speed                                                                                                                                      | Progression: movement                                                                                                                                | Progression: tools                                  |
| 22 | Forwards, backwards, sideways                                                                                                                                | Tasks for one side of body                                                                                                                           | Kind of objects (small sacks, balls, ...)           |
| 23 | walking, jogging                                                                                                                                             | Tasks for both sides of body (e.g. left knee, right hand)                                                                                            |                                                     |
| 24 | Sensory modification                                                                                                                                         | Visual: -<br>Somatosensory: -<br>Vestibular: Head turns (horizontal)                                                                                 |                                                     |
| 25 | Cognitive add-on                                                                                                                                             | -                                                                                                                                                    |                                                     |
| 26 |                                                                                                                                                              |                                                                                                                                                      |                                                     |
| 27 | <b>Agility ladder</b> <span style="float: right;">AG</span>                                                                                                  |                                                                                                                                                      |                                                     |
| 28 | <i>Participants perform exercises in an agility ladder on the floor. Number and type of foot contacts in each field are varied.</i>                          |                                                                                                                                                      |                                                     |
| 29 | Progression: DOM, speed                                                                                                                                      | Progression: complexity                                                                                                                              | Progression: tools                                  |
| 30 | Forwards, backwards, sideways                                                                                                                                | Easier sequences (2 / 3 touches)<br>Harder sequences (1,2,3,2,1 / 2 forwards 1 back / 2 in 1 out)                                                    | Kind of objects (small sacks, balls, ...)           |
| 31 | Sensory modification                                                                                                                                         | Visual: -<br>Somatosensory: -<br>Vestibular: Head turns                                                                                              |                                                     |
| 32 | Cognitive add-on                                                                                                                                             | Divided attention: Participants have to call numbers shown by therapist<br>Divided attention: Participants have to catch objects thrown by therapist |                                                     |
| 33 |                                                                                                                                                              |                                                                                                                                                      |                                                     |
| 34 |                                                                                                                                                              |                                                                                                                                                      |                                                     |
| 35 |                                                                                                                                                              |                                                                                                                                                      |                                                     |
| 36 | <b>Cone tipping</b> <span style="float: right;">AG</span>                                                                                                    |                                                                                                                                                      |                                                     |
| 37 | <i>Pairs of two: one participant starts surrounded by an assemble of cones. The partner outside of the cones says which cones have to be touched.</i>        |                                                                                                                                                      |                                                     |
| 38 | Progression: speed, duration                                                                                                                                 | Progression: number of cones                                                                                                                         |                                                     |
| 39 | Walking, jogging<br>1 round = 30s                                                                                                                            | 4 to 8                                                                                                                                               |                                                     |
| 40 | Sensory modification                                                                                                                                         | Visual: -<br>Somatosensory: -<br>Vestibular: -                                                                                                       |                                                     |
| 41 | Cognitive add-on                                                                                                                                             | Spatial orientation & memory: directions are given by numbers, colors or alphabet                                                                    |                                                     |
| 42 |                                                                                                                                                              |                                                                                                                                                      |                                                     |
| 43 |                                                                                                                                                              |                                                                                                                                                      |                                                     |
| 44 | <b>Slalom</b> <span style="float: right;">AG</span>                                                                                                          |                                                                                                                                                      |                                                     |
| 45 | <i>Participants move through a slalom parcour.</i>                                                                                                           |                                                                                                                                                      |                                                     |
| 46 | Progression: speed, duration                                                                                                                                 | Progression: number of obstacles                                                                                                                     | Progression: competition                            |
| 47 | Walking, jogging<br>1 round = 60-90s                                                                                                                         | 4 to 8                                                                                                                                               | Hit a target with an object at the end of slalom    |
| 48 | Sensory modification                                                                                                                                         | Visual: -<br>Somatosensory: -<br>Vestibular: -                                                                                                       |                                                     |
| 49 | Cognitive add-on                                                                                                                                             | -                                                                                                                                                    |                                                     |
| 50 |                                                                                                                                                              |                                                                                                                                                      |                                                     |
| 51 |                                                                                                                                                              |                                                                                                                                                      |                                                     |
| 52 |                                                                                                                                                              |                                                                                                                                                      |                                                     |
| 53 | <b>Soccer</b> <span style="float: right;">AG</span>                                                                                                          |                                                                                                                                                      |                                                     |
| 54 | <i>Participants move and pass a ball.</i>                                                                                                                    |                                                                                                                                                      |                                                     |
| 55 | Progression: speed, duration                                                                                                                                 | Progression: number of players                                                                                                                       | Progression: change of direction                    |
| 56 | Walking, jogging<br>1 round = 60-90s                                                                                                                         | 1 to 4                                                                                                                                               | Front - back<br>Front - back and sideways<br>Random |
| 57 | Sensory modification                                                                                                                                         | Visual: -<br>Somatosensory: -<br>Vestibular: -                                                                                                       |                                                     |
| 58 | Cognitive add-on                                                                                                                                             | Attention: participants have to react to stop and change of direction signals by therapist                                                           |                                                     |
| 59 |                                                                                                                                                              |                                                                                                                                                      |                                                     |
| 60 |                                                                                                                                                              |                                                                                                                                                      |                                                     |

|                                                                                                                                           |                                           |                                        |           |
|-------------------------------------------------------------------------------------------------------------------------------------------|-------------------------------------------|----------------------------------------|-----------|
| <b>"Suicide runs"</b>                                                                                                                     |                                           |                                        | <b>AG</b> |
| <i>The length of the gym is split into 3 sections. Participants cover each section in different speeds, accelerating and decelerating</i> |                                           |                                        |           |
| Progression: speed, duration                                                                                                              | Progression: Stops at end of section      | Progression: competition               |           |
| Walking, jogging                                                                                                                          | touch a cone                              | Hit a target with an object at the end |           |
| 1 round = 45-90s                                                                                                                          | circle a cone                             |                                        |           |
|                                                                                                                                           | stop - 2 steps back - accelerate forwards |                                        |           |
| Sensory modification                                                                                                                      | Visual: -                                 |                                        |           |
|                                                                                                                                           | Somatosensory: -                          |                                        |           |
|                                                                                                                                           | Vestibular: -                             |                                        |           |
| Cognitive add-on                                                                                                                          | -                                         |                                        |           |

## 2. Water-based MAT

|                                                                           |                                               |                    |           |
|---------------------------------------------------------------------------|-----------------------------------------------|--------------------|-----------|
| <b>Standing balance</b>                                                   |                                               |                    | <b>SB</b> |
| <i>Participants perform various exercises while standing in the pool.</i> |                                               |                    |           |
| Progression: BOS                                                          | Progression: free leg                         | Progression: hands |           |
| Narrow BOS                                                                | Floor "touches"                               | Inside water       |           |
| Semi-tandem stance                                                        | Leg swings                                    | Outside water      |           |
| Tandem stance                                                             | Number, amplitude, direction of swings        |                    |           |
| One leg stance (+movements of free leg)                                   |                                               |                    |           |
| Sensory modification                                                      | Visual: closed eyes                           |                    |           |
|                                                                           | Somatosensory: standing on kickboard          |                    |           |
|                                                                           | Vestibular: head turns (horizontal, vertical) |                    |           |
| Cognitive add-on                                                          | -                                             |                    |           |

|                                                                 |                                                         |                    |           |
|-----------------------------------------------------------------|---------------------------------------------------------|--------------------|-----------|
| <b>Gait and jump variations</b>                                 |                                                         |                    | <b>DB</b> |
| <i>Participants perform gait and jump variations in a lane.</i> |                                                         |                    |           |
| Progression: BOS, DOM                                           | Progression: movement                                   | Progression: hands |           |
| Narrow gait                                                     | High knees                                              | Inside water       |           |
| Tandem gait                                                     | Lunges                                                  | Outside water      |           |
| Forwards, backwards, sideways                                   | Hot steps, skipping gait                                |                    |           |
|                                                                 | Single-leg, two-legged jumps, hold landing position 3s  |                    |           |
|                                                                 | jumping jack                                            |                    |           |
| Sensory modification                                            | Visual: closed eyes                                     |                    |           |
|                                                                 | Somatosensory: walking with feet on 1-2 kickboard(s)    |                    |           |
|                                                                 | Vestibular: head turns (horizontal, vertical, diagonal) |                    |           |
| Cognitive add-on                                                | Memory: 4 variations of jumping jack                    |                    |           |

|                                                                                                                             |                                                                                              |  |           |
|-----------------------------------------------------------------------------------------------------------------------------|----------------------------------------------------------------------------------------------|--|-----------|
| <b>"Movement memory"</b>                                                                                                    |                                                                                              |  | <b>DB</b> |
| <i>Participants move through the water while performing gait variations coded with various commands given by therapist.</i> |                                                                                              |  |           |
| Progression: movement                                                                                                       | Progression: number of pairs                                                                 |  |           |
| Only legs/only arms                                                                                                         | 4 to 8                                                                                       |  |           |
| Combination of arms + legs, one-side of body                                                                                |                                                                                              |  |           |
| Combination of arms + legs, both sides of body                                                                              |                                                                                              |  |           |
| Similarity of movements                                                                                                     |                                                                                              |  |           |
| Sensory modification                                                                                                        | Visual: -                                                                                    |  |           |
|                                                                                                                             | Somatosensory: -                                                                             |  |           |
|                                                                                                                             | Vestibular: -                                                                                |  |           |
| Cognitive add-on (main focus)                                                                                               | Memory: recall pairs (movement+number / movement+color word / movement+number or color word) |  |           |
|                                                                                                                             | Inhibition: command = stop                                                                   |  |           |

|                                                                                                                                                       |                                                                                          |                                 |           |
|-------------------------------------------------------------------------------------------------------------------------------------------------------|------------------------------------------------------------------------------------------|---------------------------------|-----------|
| <b>"Commander"</b>                                                                                                                                    |                                                                                          |                                 | <b>DB</b> |
| <i>Pairs of two. One participant must respond to the commands of the partner. The commands consist of different combinations of a catch and step.</i> |                                                                                          |                                 |           |
| Progression: movement                                                                                                                                 | Progression: starting position                                                           | Progression: number of commands |           |
| Catch/step = same side of body                                                                                                                        | Floor                                                                                    | 2 to 8                          |           |
| Catch/step = diagonal                                                                                                                                 | standing on kickboard                                                                    |                                 |           |
|                                                                                                                                                       | 180° turns before catching                                                               |                                 |           |
| Sensory modifications                                                                                                                                 | Visual: starting position with closed eyes                                               |                                 |           |
|                                                                                                                                                       | Somatosensory: kickboard (starting position)                                             |                                 |           |
|                                                                                                                                                       | Vestibular: 180° turns (starting position)                                               |                                 |           |
| Cognitive add-on (main focus)                                                                                                                         | Memory: recall pairs (movement + number / movement + color / movement + number or color) |                                 |           |
|                                                                                                                                                       | Inhibition: command = stop                                                               |                                 |           |
|                                                                                                                                                       | Reaction: reduce response time                                                           |                                 |           |

|                                                                                                           |                  |  |           |
|-----------------------------------------------------------------------------------------------------------|------------------|--|-----------|
| <b>"Circuit Training"</b>                                                                                 |                  |  | <b>DB</b> |
| <i>Participants complete a circuit as pairs, consisting of various functional leg strength exercises.</i> |                  |  |           |
| Progression: duration, speed                                                                              |                  |  |           |
| 45-60s per exercise, 2-3 rounds, 3-4 exercises per round                                                  |                  |  |           |
| Exercises include: running, swimming, jumping, step-ups                                                   |                  |  |           |
| Sensory modifications                                                                                     | Visual: -        |  |           |
|                                                                                                           | Somatosensory: - |  |           |
|                                                                                                           | Vestibular: -    |  |           |
| Cognitive add-on                                                                                          | -                |  |           |

|                                                                                                                                                                      |                                                                                                                                                                                                                                                                                                                                                           |              |
|----------------------------------------------------------------------------------------------------------------------------------------------------------------------|-----------------------------------------------------------------------------------------------------------------------------------------------------------------------------------------------------------------------------------------------------------------------------------------------------------------------------------------------------------|--------------|
| <b>"Chaosball"</b>                                                                                                                                                   |                                                                                                                                                                                                                                                                                                                                                           | <b>SB/AG</b> |
| <i>Participants stand in a circle and throw a ball to each other in a certain order. Various attributes of other participants must be remembered in the process.</i> |                                                                                                                                                                                                                                                                                                                                                           |              |
| Progression: number of orders / objects                                                                                                                              |                                                                                                                                                                                                                                                                                                                                                           |              |
| 1 order (= 1 object)                                                                                                                                                 |                                                                                                                                                                                                                                                                                                                                                           |              |
| Change: 2 orders (= 2 objects)                                                                                                                                       |                                                                                                                                                                                                                                                                                                                                                           |              |
| Simultaneously: 2 orders (= 2 objects)                                                                                                                               |                                                                                                                                                                                                                                                                                                                                                           |              |
| Simultaneously: 3 orders (= 3 objects)                                                                                                                               |                                                                                                                                                                                                                                                                                                                                                           |              |
| Sensory modifications                                                                                                                                                | Visual: -<br>Somatosensory: -<br>Vestibular: -                                                                                                                                                                                                                                                                                                            |              |
| Cognitive add-on (main focus)                                                                                                                                        | Memory: recall orders<br>Divided attention: more than one object<br>Spatial orientation: comply with order, while participants no longer stand in a circle, but walk/run around in the pool                                                                                                                                                               |              |
| <b>"Waiter"</b>                                                                                                                                                      |                                                                                                                                                                                                                                                                                                                                                           | <b>AG</b>    |
| <i>Participants balance a ball on a kickboard and simultaneously perform different exercises.</i>                                                                    |                                                                                                                                                                                                                                                                                                                                                           |              |
| Progression: DOM, speed                                                                                                                                              | Progression: movement                                                                                                                                                                                                                                                                                                                                     |              |
| Walk, jog                                                                                                                                                            | Balance ball, throw & catch ball                                                                                                                                                                                                                                                                                                                          |              |
| Forwards, backwards, turns                                                                                                                                           | Change hands on kickboard<br>Throw & catch ball while changing hands                                                                                                                                                                                                                                                                                      |              |
| Sensory modification                                                                                                                                                 | Visual: Move eyes away from ball<br>Somatosensory: -<br>Vestibular: throw & catch with 180°/360° turns                                                                                                                                                                                                                                                    |              |
| Cognitive add-on (main focus)                                                                                                                                        | Dual-task: walk/jog & balance ball & react to commands from therapist<br>Divided attention: balance ball while commands given by therapist include hand signs<br>Memory: commands from therapist are given via numbers or via a mix of numbers, hand signs, and/or clapping<br>Processing speed: react as fast as possible to commands given by therapist |              |
| <b>"Compass"</b>                                                                                                                                                     |                                                                                                                                                                                                                                                                                                                                                           | <b>AG</b>    |
| <i>Participants move in the directions given by therapist.</i>                                                                                                       |                                                                                                                                                                                                                                                                                                                                                           |              |
| Progression: speed, duration                                                                                                                                         | Progression: number of directions                                                                                                                                                                                                                                                                                                                         |              |
| Walking, jogging                                                                                                                                                     | 4 to 8 (front, back, side, diagonal)                                                                                                                                                                                                                                                                                                                      |              |
| 1 round = 45-60s                                                                                                                                                     |                                                                                                                                                                                                                                                                                                                                                           |              |
| Sensory modification                                                                                                                                                 | Visual: -<br>Somatosensory: -<br>Vestibular: -                                                                                                                                                                                                                                                                                                            |              |
| Cognitive add-on                                                                                                                                                     | Memory: recall pairs (direction+number / direction+color word)<br>Inhibition: therapist gives false cues<br>Processing speed: react as fast as possible to commands                                                                                                                                                                                       |              |
| <b>"Mirror"</b>                                                                                                                                                      |                                                                                                                                                                                                                                                                                                                                                           | <b>AG</b>    |
| <i>Pairs of two. One participant leads, the other follows while always keeping the same distance.</i>                                                                |                                                                                                                                                                                                                                                                                                                                                           |              |
| Progression: speed, duration                                                                                                                                         | Progression: fakes                                                                                                                                                                                                                                                                                                                                        |              |
| Walking, jogging, competition (shake off)                                                                                                                            | Leader fakes change of direction<br>Leader changes speeds                                                                                                                                                                                                                                                                                                 |              |
| 45-60sec.                                                                                                                                                            |                                                                                                                                                                                                                                                                                                                                                           |              |
| Sensory modification                                                                                                                                                 | Visual: -<br>Somatosensory: -<br>Vestibular: -                                                                                                                                                                                                                                                                                                            |              |
| Cognitive add-on                                                                                                                                                     | -                                                                                                                                                                                                                                                                                                                                                         |              |
| <b>"Beachball"</b>                                                                                                                                                   |                                                                                                                                                                                                                                                                                                                                                           | <b>AG</b>    |
| <i>Participants play with a beachball.</i>                                                                                                                           |                                                                                                                                                                                                                                                                                                                                                           |              |
| Progression: number of players                                                                                                                                       |                                                                                                                                                                                                                                                                                                                                                           |              |
| 2 to whole group                                                                                                                                                     |                                                                                                                                                                                                                                                                                                                                                           |              |
| Sensory modification                                                                                                                                                 | Visual: -<br>Somatosensory: standing on kickboard<br>Vestibular: -                                                                                                                                                                                                                                                                                        |              |
| Cognitive add-on                                                                                                                                                     | -                                                                                                                                                                                                                                                                                                                                                         |              |

MAT = multimodal agility-based exercise training; BOS = Base of support; DOM = Direction of movement

## Components

- SB = Standing balance
- DB = Dynamic balance & functional leg strength
- AG = Agility

Each bracket represents a module. Each module targets one of the three components.

- 1  
2  
3  
4  
5  
6  
7  
8  
9  
10  
11  
12  
13  
14  
15  
16  
17  
18  
19  
20  
21  
22  
23  
24  
25  
26  
27  
28  
29  
30  
31  
32  
33  
34  
35  
36  
37  
38  
39  
40  
41  
42  
43  
44  
45  
46  
47  
48  
49  
50  
51  
52  
53  
54  
55  
56  
57  
58  
59  
60
1. Callesen J, Cattaneo D, Brincks J, et al. How do resistance training and balance and motor control training affect gait performance and fatigue impact in people with multiple sclerosis? A randomized controlled multi-center study. *Mult Scler* 2020;26(11):1420-32. doi: 10.1177/1352458519865740 [published Online First: 20190724]

For peer review only

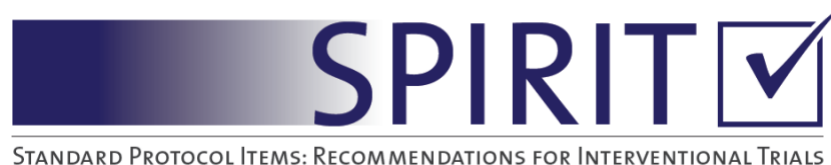

STANDARD PROTOCOL ITEMS: RECOMMENDATIONS FOR INTERVENTIONAL TRIALS

SPIRIT 2013 Checklist: Recommended items to address in a clinical trial protocol and related documents\*

| Section/item                      | Item No | Description                                                                                                                                                                                                                                                                              | Addressed on page number |
|-----------------------------------|---------|------------------------------------------------------------------------------------------------------------------------------------------------------------------------------------------------------------------------------------------------------------------------------------------|--------------------------|
| <b>Administrative information</b> |         |                                                                                                                                                                                                                                                                                          |                          |
| Title                             | 1       | Descriptive title identifying the study design, population, interventions, and, if applicable, trial acronym                                                                                                                                                                             | ___ 1 ___                |
| Trial registration                | 2a      | Trial identifier and registry name. If not yet registered, name of intended registry                                                                                                                                                                                                     | ___ 3 ___                |
|                                   | 2b      | All items from the World Health Organization Trial Registration Data Set                                                                                                                                                                                                                 | ___ n/a ___              |
| Protocol version                  | 3       | Date and version identifier                                                                                                                                                                                                                                                              | ___ n/a ___              |
| Funding                           | 4       | Sources and types of financial, material, and other support                                                                                                                                                                                                                              | ___ 25 ___               |
| Roles and responsibilities        | 5a      | Names, affiliations, and roles of protocol contributors                                                                                                                                                                                                                                  | ___ 1;25 ___             |
|                                   | 5b      | Name and contact information for the trial sponsor                                                                                                                                                                                                                                       | ___ 25 ___               |
|                                   | 5c      | Role of study sponsor and funders, if any, in study design; collection, management, analysis, and interpretation of data; writing of the report; and the decision to submit the report for publication, including whether they will have ultimate authority over any of these activities | ___ 25 ___               |
|                                   | 5d      | Composition, roles, and responsibilities of the coordinating centre, steering committee, endpoint adjudication committee, data management team, and other individuals or groups overseeing the trial, if applicable (see Item 21a for data monitoring committee)                         | ___ n/a ___              |

1 **Introduction**

2

3 Background and rationale 6a Description of research question and justification for undertaking the trial, including summary of relevant studies (published and unpublished) examining benefits and harms for each intervention \_\_\_3-6\_\_\_

4

5

6 6b Explanation for choice of comparators \_\_\_4-5\_\_\_

7

8 Objectives 7 Specific objectives or hypotheses \_\_\_5-6\_\_\_

9

10 Trial design 8 Description of trial design including type of trial (eg, parallel group, crossover, factorial, single group), allocation ratio, and framework (eg, superiority, equivalence, noninferiority, exploratory) \_\_\_6;8-9\_\_\_

11

12

13

14 **Methods: Participants, interventions, and outcomes**

15

16 Study setting 9 Description of study settings (eg, community clinic, academic hospital) and list of countries where data will be collected. Reference to where list of study sites can be obtained \_\_\_6\_\_\_

17

18

19 Eligibility criteria 10 Inclusion and exclusion criteria for participants. If applicable, eligibility criteria for study centres and individuals who will perform the interventions (eg, surgeons, psychotherapists) \_\_\_9-10\_\_\_

20

21

22 Interventions 11a Interventions for each group with sufficient detail to allow replication, including how and when they will be administered \_\_\_10-13\_\_\_

23

24 11b Criteria for discontinuing or modifying allocated interventions for a given trial participant (eg, drug dose change in response to harms, participant request, or improving/worsening disease) \_\_\_11-13\_\_\_

25

26 11c Strategies to improve adherence to intervention protocols, and any procedures for monitoring adherence (eg, drug tablet return, laboratory tests) \_\_\_16-17\_\_\_

27

28 11d Relevant concomitant care and interventions that are permitted or prohibited during the trial \_\_\_10-11\_\_\_

29

30 Outcomes 12 Primary, secondary, and other outcomes, including the specific measurement variable (eg, systolic blood pressure), analysis metric (eg, change from baseline, final value, time to event), method of aggregation (eg, median, proportion), and time point for each outcome. Explanation of the clinical relevance of chosen efficacy and harm outcomes is strongly recommended \_\_\_14-21\_\_\_

31

32

33

34 Participant timeline 13 Time schedule of enrolment, interventions (including any run-ins and washouts), assessments, and visits for participants. A schematic diagram is highly recommended (see Figure) \_\_\_7-9\_\_\_

35

36

37

38

39

40

41

42

43

44

45

46

|    |                                                                     |     |                                                                                                                                                                                                                                                                                                                                                                                                              |             |
|----|---------------------------------------------------------------------|-----|--------------------------------------------------------------------------------------------------------------------------------------------------------------------------------------------------------------------------------------------------------------------------------------------------------------------------------------------------------------------------------------------------------------|-------------|
| 1  | Sample size                                                         | 14  | Estimated number of participants needed to achieve study objectives and how it was determined, including clinical and statistical assumptions supporting any sample size calculations                                                                                                                                                                                                                        | ___9___     |
| 2  |                                                                     |     |                                                                                                                                                                                                                                                                                                                                                                                                              |             |
| 3  |                                                                     |     |                                                                                                                                                                                                                                                                                                                                                                                                              |             |
| 4  | Recruitment                                                         | 15  | Strategies for achieving adequate participant enrolment to reach target sample size                                                                                                                                                                                                                                                                                                                          | ___8___     |
| 5  |                                                                     |     |                                                                                                                                                                                                                                                                                                                                                                                                              |             |
| 6  |                                                                     |     |                                                                                                                                                                                                                                                                                                                                                                                                              |             |
| 7  | <b>Methods: Assignment of interventions (for controlled trials)</b> |     |                                                                                                                                                                                                                                                                                                                                                                                                              |             |
| 8  | Allocation:                                                         |     |                                                                                                                                                                                                                                                                                                                                                                                                              |             |
| 9  |                                                                     |     |                                                                                                                                                                                                                                                                                                                                                                                                              |             |
| 10 | Sequence                                                            | 16a | Method of generating the allocation sequence (eg, computer-generated random numbers), and list of any factors for stratification. To reduce predictability of a random sequence, details of any planned restriction (eg, blocking) should be provided in a separate document that is unavailable to those who enrol participants or assign interventions                                                     | ___8-9___   |
| 11 | generation                                                          |     |                                                                                                                                                                                                                                                                                                                                                                                                              |             |
| 12 |                                                                     |     |                                                                                                                                                                                                                                                                                                                                                                                                              |             |
| 13 |                                                                     |     |                                                                                                                                                                                                                                                                                                                                                                                                              |             |
| 14 |                                                                     |     |                                                                                                                                                                                                                                                                                                                                                                                                              |             |
| 15 |                                                                     |     |                                                                                                                                                                                                                                                                                                                                                                                                              |             |
| 16 | Allocation                                                          | 16b | Mechanism of implementing the allocation sequence (eg, central telephone; sequentially numbered, opaque, sealed envelopes), describing any steps to conceal the sequence until interventions are assigned                                                                                                                                                                                                    | ___8-9___   |
| 17 | concealment                                                         |     |                                                                                                                                                                                                                                                                                                                                                                                                              |             |
| 18 | mechanism                                                           |     |                                                                                                                                                                                                                                                                                                                                                                                                              |             |
| 19 |                                                                     |     |                                                                                                                                                                                                                                                                                                                                                                                                              |             |
| 20 | Implementation                                                      | 16c | Who will generate the allocation sequence, who will enrol participants, and who will assign participants to interventions                                                                                                                                                                                                                                                                                    | ___8-9___   |
| 21 |                                                                     |     |                                                                                                                                                                                                                                                                                                                                                                                                              |             |
| 22 |                                                                     |     |                                                                                                                                                                                                                                                                                                                                                                                                              |             |
| 23 |                                                                     |     |                                                                                                                                                                                                                                                                                                                                                                                                              |             |
| 24 | Blinding (masking)                                                  | 17a | Who will be blinded after assignment to interventions (eg, trial participants, care providers, outcome assessors, data analysts), and how                                                                                                                                                                                                                                                                    | ___14___    |
| 25 |                                                                     |     |                                                                                                                                                                                                                                                                                                                                                                                                              |             |
| 26 |                                                                     |     |                                                                                                                                                                                                                                                                                                                                                                                                              |             |
| 27 |                                                                     | 17b | If blinded, circumstances under which unblinding is permissible, and procedure for revealing a participant's allocated intervention during the trial                                                                                                                                                                                                                                                         | ___n/a___   |
| 28 |                                                                     |     |                                                                                                                                                                                                                                                                                                                                                                                                              |             |
| 29 |                                                                     |     |                                                                                                                                                                                                                                                                                                                                                                                                              |             |
| 30 |                                                                     |     |                                                                                                                                                                                                                                                                                                                                                                                                              |             |
| 31 | <b>Methods: Data collection, management, and analysis</b>           |     |                                                                                                                                                                                                                                                                                                                                                                                                              |             |
| 32 |                                                                     |     |                                                                                                                                                                                                                                                                                                                                                                                                              |             |
| 33 | Data collection                                                     | 18a | Plans for assessment and collection of outcome, baseline, and other trial data, including any related processes to promote data quality (eg, duplicate measurements, training of assessors) and a description of study instruments (eg, questionnaires, laboratory tests) along with their reliability and validity, if known. Reference to where data collection forms can be found, if not in the protocol | ___14-21___ |
| 34 | methods                                                             |     |                                                                                                                                                                                                                                                                                                                                                                                                              |             |
| 35 |                                                                     |     |                                                                                                                                                                                                                                                                                                                                                                                                              |             |
| 36 |                                                                     |     |                                                                                                                                                                                                                                                                                                                                                                                                              |             |
| 37 |                                                                     |     |                                                                                                                                                                                                                                                                                                                                                                                                              |             |
| 38 |                                                                     |     |                                                                                                                                                                                                                                                                                                                                                                                                              |             |
| 39 |                                                                     | 18b | Plans to promote participant retention and complete follow-up, including list of any outcome data to be collected for participants who discontinue or deviate from intervention protocols                                                                                                                                                                                                                    | ___15-17___ |
| 40 |                                                                     |     |                                                                                                                                                                                                                                                                                                                                                                                                              |             |
| 41 |                                                                     |     |                                                                                                                                                                                                                                                                                                                                                                                                              |             |
| 42 |                                                                     |     |                                                                                                                                                                                                                                                                                                                                                                                                              |             |



|    |                                 |     |                                                                                                                                                                                                                                                                                                                                       |                |
|----|---------------------------------|-----|---------------------------------------------------------------------------------------------------------------------------------------------------------------------------------------------------------------------------------------------------------------------------------------------------------------------------------------|----------------|
| 1  | Data management                 | 19  | Plans for data entry, coding, security, and storage, including any related processes to promote data quality (eg, double data entry; range checks for data values). Reference to where details of data management procedures can be found, if not in the protocol                                                                     | _____23____    |
| 2  |                                 |     |                                                                                                                                                                                                                                                                                                                                       |                |
| 3  |                                 |     |                                                                                                                                                                                                                                                                                                                                       |                |
| 4  |                                 |     |                                                                                                                                                                                                                                                                                                                                       |                |
| 5  | Statistical methods             | 20a | Statistical methods for analysing primary and secondary outcomes. Reference to where other details of the statistical analysis plan can be found, if not in the protocol                                                                                                                                                              | _____21-22____ |
| 6  |                                 |     |                                                                                                                                                                                                                                                                                                                                       |                |
| 7  |                                 |     |                                                                                                                                                                                                                                                                                                                                       |                |
| 8  |                                 | 20b | Methods for any additional analyses (eg, subgroup and adjusted analyses)                                                                                                                                                                                                                                                              | _____n/a____   |
| 9  |                                 |     |                                                                                                                                                                                                                                                                                                                                       |                |
| 10 |                                 | 20c | Definition of analysis population relating to protocol non-adherence (eg, as randomised analysis), and any statistical methods to handle missing data (eg, multiple imputation)                                                                                                                                                       | _____n/a____   |
| 11 |                                 |     |                                                                                                                                                                                                                                                                                                                                       |                |
| 12 |                                 |     |                                                                                                                                                                                                                                                                                                                                       |                |
| 13 |                                 |     |                                                                                                                                                                                                                                                                                                                                       |                |
| 14 | <b>Methods: Monitoring</b>      |     |                                                                                                                                                                                                                                                                                                                                       |                |
| 15 |                                 |     |                                                                                                                                                                                                                                                                                                                                       |                |
| 16 | Data monitoring                 | 21a | Composition of data monitoring committee (DMC); summary of its role and reporting structure; statement of whether it is independent from the sponsor and competing interests; and reference to where further details about its charter can be found, if not in the protocol. Alternatively, an explanation of why a DMC is not needed | _____n/a____   |
| 17 |                                 |     |                                                                                                                                                                                                                                                                                                                                       |                |
| 18 |                                 |     |                                                                                                                                                                                                                                                                                                                                       |                |
| 19 |                                 |     |                                                                                                                                                                                                                                                                                                                                       |                |
| 20 |                                 |     |                                                                                                                                                                                                                                                                                                                                       |                |
| 21 |                                 |     |                                                                                                                                                                                                                                                                                                                                       |                |
| 22 |                                 | 21b | Description of any interim analyses and stopping guidelines, including who will have access to these interim results and make the final decision to terminate the trial                                                                                                                                                               | _____n/a____   |
| 23 |                                 |     |                                                                                                                                                                                                                                                                                                                                       |                |
| 24 |                                 |     |                                                                                                                                                                                                                                                                                                                                       |                |
| 25 | Harms                           | 22  | Plans for collecting, assessing, reporting, and managing solicited and spontaneously reported adverse events and other unintended effects of trial interventions or trial conduct                                                                                                                                                     | _____17____    |
| 26 |                                 |     |                                                                                                                                                                                                                                                                                                                                       |                |
| 27 |                                 |     |                                                                                                                                                                                                                                                                                                                                       |                |
| 28 | Auditing                        | 23  | Frequency and procedures for auditing trial conduct, if any, and whether the process will be independent from investigators and the sponsor                                                                                                                                                                                           | _____n/a____   |
| 29 |                                 |     |                                                                                                                                                                                                                                                                                                                                       |                |
| 30 |                                 |     |                                                                                                                                                                                                                                                                                                                                       |                |
| 31 |                                 |     |                                                                                                                                                                                                                                                                                                                                       |                |
| 32 | <b>Ethics and dissemination</b> |     |                                                                                                                                                                                                                                                                                                                                       |                |
| 33 |                                 |     |                                                                                                                                                                                                                                                                                                                                       |                |
| 34 | Research ethics approval        | 24  | Plans for seeking research ethics committee/institutional review board (REC/IRB) approval                                                                                                                                                                                                                                             | _____23____    |
| 35 |                                 |     |                                                                                                                                                                                                                                                                                                                                       |                |
| 36 |                                 |     |                                                                                                                                                                                                                                                                                                                                       |                |
| 37 | Protocol amendments             | 25  | Plans for communicating important protocol modifications (eg, changes to eligibility criteria, outcomes, analyses) to relevant parties (eg, investigators, REC/IRBs, trial participants, trial registries, journals, regulators)                                                                                                      | _____22-23____ |
| 38 |                                 |     |                                                                                                                                                                                                                                                                                                                                       |                |
| 39 |                                 |     |                                                                                                                                                                                                                                                                                                                                       |                |
| 40 |                                 |     |                                                                                                                                                                                                                                                                                                                                       |                |
| 41 |                                 |     |                                                                                                                                                                                                                                                                                                                                       |                |
| 42 |                                 |     |                                                                                                                                                                                                                                                                                                                                       |                |
| 43 |                                 |     |                                                                                                                                                                                                                                                                                                                                       |                |
| 44 |                                 |     |                                                                                                                                                                                                                                                                                                                                       |                |
| 45 |                                 |     |                                                                                                                                                                                                                                                                                                                                       |                |
| 46 |                                 |     |                                                                                                                                                                                                                                                                                                                                       |                |

|    |                               |     |                                                                                                                                                                                                                                                                                     |                  |
|----|-------------------------------|-----|-------------------------------------------------------------------------------------------------------------------------------------------------------------------------------------------------------------------------------------------------------------------------------------|------------------|
| 1  | Consent or assent             | 26a | Who will obtain informed consent or assent from potential trial participants or authorised surrogates, and how (see Item 32)                                                                                                                                                        | _____8_____      |
| 2  |                               |     |                                                                                                                                                                                                                                                                                     |                  |
| 3  |                               |     |                                                                                                                                                                                                                                                                                     |                  |
| 4  |                               | 26b | Additional consent provisions for collection and use of participant data and biological specimens in ancillary studies, if applicable                                                                                                                                               | _____n/a_____    |
| 5  |                               |     |                                                                                                                                                                                                                                                                                     |                  |
| 6  |                               |     |                                                                                                                                                                                                                                                                                     |                  |
| 7  | Confidentiality               | 27  | How personal information about potential and enrolled participants will be collected, shared, and maintained in order to protect confidentiality before, during, and after the trial                                                                                                | _____23_____     |
| 8  |                               |     |                                                                                                                                                                                                                                                                                     |                  |
| 9  |                               |     |                                                                                                                                                                                                                                                                                     |                  |
| 10 | Declaration of interests      | 28  | Financial and other competing interests for principal investigators for the overall trial and each study site                                                                                                                                                                       | _____25-26_____  |
| 11 |                               |     |                                                                                                                                                                                                                                                                                     |                  |
| 12 |                               |     |                                                                                                                                                                                                                                                                                     |                  |
| 13 | Access to data                | 29  | Statement of who will have access to the final trial dataset, and disclosure of contractual agreements that limit such access for investigators                                                                                                                                     | _____23_____     |
| 14 |                               |     |                                                                                                                                                                                                                                                                                     |                  |
| 15 |                               |     |                                                                                                                                                                                                                                                                                     |                  |
| 16 | Ancillary and post-trial care | 30  | Provisions, if any, for ancillary and post-trial care, and for compensation to those who suffer harm from trial participation                                                                                                                                                       | _____n/a_____    |
| 17 |                               |     |                                                                                                                                                                                                                                                                                     |                  |
| 18 |                               |     |                                                                                                                                                                                                                                                                                     |                  |
| 19 |                               |     |                                                                                                                                                                                                                                                                                     |                  |
| 20 | Dissemination policy          | 31a | Plans for investigators and sponsor to communicate trial results to participants, healthcare professionals, the public, and other relevant groups (eg, via publication, reporting in results databases, or other data sharing arrangements), including any publication restrictions | _____23_____     |
| 21 |                               |     |                                                                                                                                                                                                                                                                                     |                  |
| 22 |                               |     |                                                                                                                                                                                                                                                                                     |                  |
| 23 |                               |     |                                                                                                                                                                                                                                                                                     |                  |
| 24 |                               | 31b | Authorship eligibility guidelines and any intended use of professional writers                                                                                                                                                                                                      | _____25_____     |
| 25 |                               |     |                                                                                                                                                                                                                                                                                     |                  |
| 26 |                               | 31c | Plans, if any, for granting public access to the full protocol, participant-level dataset, and statistical code                                                                                                                                                                     | _____n/a_____    |
| 27 |                               |     |                                                                                                                                                                                                                                                                                     |                  |
| 28 |                               |     |                                                                                                                                                                                                                                                                                     |                  |
| 29 | <b>Appendices</b>             |     |                                                                                                                                                                                                                                                                                     |                  |
| 30 |                               |     |                                                                                                                                                                                                                                                                                     |                  |
| 31 | Informed consent materials    | 32  | Model consent form and other related documentation given to participants and authorised surrogates                                                                                                                                                                                  | ___Supplement___ |
| 32 |                               |     |                                                                                                                                                                                                                                                                                     |                  |
| 33 |                               |     |                                                                                                                                                                                                                                                                                     |                  |
| 34 | Biological specimens          | 33  | Plans for collection, laboratory evaluation, and storage of biological specimens for genetic or molecular analysis in the current trial and for future use in ancillary studies, if applicable                                                                                      | _____n/a_____    |
| 35 |                               |     |                                                                                                                                                                                                                                                                                     |                  |
| 36 |                               |     |                                                                                                                                                                                                                                                                                     |                  |

37 \*It is strongly recommended that this checklist be read in conjunction with the SPIRIT 2013 Explanation & Elaboration for important clarification on the items.  
 38 Amendments to the protocol should be tracked and dated. The SPIRIT checklist is copyrighted by the SPIRIT Group under the Creative Commons  
 39 "[Attribution-NonCommercial-NoDerivs 3.0 Unported](https://creativecommons.org/licenses/by-nc-nd/3.0/)" license.  
 40  
 41  
 42
