# Supplementary material for: Randomised controlled pilot and feasibility study of multimodal agility-based exercise training (MAT) versus strength and endurance training (SET) to improve multiple sclerosis-related fatigue and fatigability during inpatient rehabilitation (ReFEx): study protocol
Source: PubMed Central journal article supplement — BMJ Open. 2022 Sep 6;12(9):e062160. doi: 10.1136/bmjopen-2022-062160 (PMC9454066; doi:10.1136/bmjopen-2022-062160), 2022-09-06
Supplement: bmjopen-2022-062160supp001.pdf [file bmjopen-2022-062160supp001.pdf]

**ReFEx Strength Protocol**

| <b>Principles:</b>                                                                                                                                                         |                                                                                                                             | <b>Intensity:</b>                                                                                                                                                                                 |  |
|----------------------------------------------------------------------------------------------------------------------------------------------------------------------------|-----------------------------------------------------------------------------------------------------------------------------|---------------------------------------------------------------------------------------------------------------------------------------------------------------------------------------------------|--|
| <ul style="list-style-type: none"> <li>• Frequency: 3x/week</li> <li>• Focus on leg strength/no balance training</li> <li>• 5min warm-up, 3-4 exercises/session</li> </ul> |                                                                                                                             | <ul style="list-style-type: none"> <li>• Session 1-5: 3x10 repetitions at 15 RPM</li> <li>• Session 6 to T<sub>1</sub>: 3x12 repetitions at 12 RPM</li> <li>• Break between sets: 1min</li> </ul> |  |
| <b>Session-RPE:</b>                                                                                                                                                        |                                                                                                                             |                                                                                                                                                                                                   |  |
| At the end of every training the participant is requested to provide a rating on perceived exertion (i.e., session-RPE) for the complete session                           |                                                                                                                             |                                                                                                                                                                                                   |  |
| <b>Warm-up (5min):</b>                                                                                                                                                     |                                                                                                                             |                                                                                                                                                                                                   |  |
| <ul style="list-style-type: none"> <li>• Participants can choose between treadmill, cross trainer, stepper, and recumbent stepper</li> </ul>                               |                                                                                                                             |                                                                                                                                                                                                   |  |
| <b>Exercise pool:</b>                                                                                                                                                      |                                                                                                                             |                                                                                                                                                                                                   |  |
| Always determine 15RPM before starting a new exercise!                                                                                                                     |                                                                                                                             |                                                                                                                                                                                                   |  |
| <b>1 hip</b>                                                                                                                                                               |                                                                                                                             |                                                                                                                                                                                                   |  |
| a) Extension<br>Leg press (upper body upright) <ul style="list-style-type: none"> <li>• Start: hip angle as small as possible</li> </ul>                                   | b) Flexion<br>Standing knee raises (cable) <ul style="list-style-type: none"> <li>• With balance support (chair)</li> </ul> | c) Abduction<br>Standing abduction (cable) <ul style="list-style-type: none"> <li>• With balance support</li> </ul>                                                                               |  |
| <b>2 knee</b>                                                                                                                                                              |                                                                                                                             |                                                                                                                                                                                                   |  |
| a) Extension<br>Leg press (supine)                                                                                                                                         | b) Flexion<br>Prone leg curls (cable) <ul style="list-style-type: none"> <li>• End: &gt;90° flexion</li> </ul>              |                                                                                                                                                                                                   |  |
| <b>3 foot</b>                                                                                                                                                              |                                                                                                                             |                                                                                                                                                                                                   |  |
| a) Plantar flexion<br>Calf raises on leg press <ul style="list-style-type: none"> <li>• Large ankle ROM</li> </ul>                                                         |                                                                                                                             |                                                                                                                                                                                                   |  |

RPM = Repetition maximum; RPE = Rated perceived exertion; ROM = Range of motion
