# Supplementary material for: Randomised controlled pilot and feasibility study of multimodal agility-based exercise training (MAT) versus strength and endurance training (SET) to improve multiple sclerosis-related fatigue and fatigability during inpatient rehabilitation (ReFEx): study protocol
Source: PubMed Central journal article supplement — BMJ Open. 2022 Sep 6;12(9):e062160. doi: 10.1136/bmjopen-2022-062160 (PMC9454066; doi:10.1136/bmjopen-2022-062160), 2022-09-06
Supplement: bmjopen-2022-062160supp002.pdf [file bmjopen-2022-062160supp002.pdf]

Manual for the land-based and water-based MAT (adapted from<sup>1</sup>)

## 1. Land-based MAT

|                                                                                                                                                               |                                                                                                   |                                           |           |
|---------------------------------------------------------------------------------------------------------------------------------------------------------------|---------------------------------------------------------------------------------------------------|-------------------------------------------|-----------|
| <b>Standing balance</b>                                                                                                                                       |                                                                                                   |                                           | <b>SB</b> |
| <i>Participants perform various exercises while standing.</i>                                                                                                 |                                                                                                   |                                           |           |
| Progression: BOS                                                                                                                                              | Progression: Catching & Throwing                                                                  | Progression: Tools                        |           |
| Narrow BOS                                                                                                                                                    | Alone                                                                                             | Number of objects for throwing            |           |
| Semi-tandem stance                                                                                                                                            | With partner                                                                                      | Kind of objects (small sacks, balls, ...) |           |
| Tandem stance                                                                                                                                                 |                                                                                                   |                                           |           |
| One leg stance (+movements of opposite leg)                                                                                                                   |                                                                                                   |                                           |           |
| Half kneeling                                                                                                                                                 |                                                                                                   |                                           |           |
| Sensory modification                                                                                                                                          | Visual: closed eyes                                                                               |                                           |           |
|                                                                                                                                                               | Somatosensory: various unstable support surfaces                                                  |                                           |           |
|                                                                                                                                                               | Vestibular: head turns (horizontal, vertical)                                                     |                                           |           |
| Cognitive add-on                                                                                                                                              | -                                                                                                 |                                           |           |
| <b>"Chaosball"</b>                                                                                                                                            |                                                                                                   |                                           | <b>SB</b> |
| <i>An object (e.g. ball) is passed in a group in a certain sequence, participants follow the sequence and recall certain attributes of the group members.</i> |                                                                                                   |                                           |           |
| Progression: Number of sequences/objects                                                                                                                      |                                                                                                   |                                           |           |
| 1 sequence (= 1 object)                                                                                                                                       |                                                                                                   |                                           |           |
| Switching: 2 sequences (= 2 objects)                                                                                                                          |                                                                                                   |                                           |           |
| Simultaneously: 2 sequences (= 2 objects)                                                                                                                     |                                                                                                   |                                           |           |
| Simultaneously: 3 sequences (= 3 objects)                                                                                                                     |                                                                                                   |                                           |           |
| Sensory modification                                                                                                                                          | Visual: -                                                                                         |                                           |           |
|                                                                                                                                                               | Somatosensory: various unstable support surfaces                                                  |                                           |           |
|                                                                                                                                                               | Vestibular: -                                                                                     |                                           |           |
| Cognitive add-on (main focus)                                                                                                                                 | Memory: Recall orders                                                                             |                                           |           |
|                                                                                                                                                               | Divided attention: more than one object                                                           |                                           |           |
| <b>Balancing on lines</b>                                                                                                                                     |                                                                                                   |                                           | <b>DB</b> |
| <i>Participants follow the lines on the gym floor.</i>                                                                                                        |                                                                                                   |                                           |           |
| Progression: BOS, DOM                                                                                                                                         | Progression: Movement                                                                             | Progression: Speed of movement            |           |
| Narrow gait                                                                                                                                                   | High knees                                                                                        | Slow swing phase (e.g., 3s)               |           |
| Tandem gait                                                                                                                                                   | Lunges                                                                                            |                                           |           |
| Forwards, backwards                                                                                                                                           |                                                                                                   |                                           |           |
| Sensory modification                                                                                                                                          | Visual: Perform several steps with eyes closed                                                    |                                           |           |
|                                                                                                                                                               | Somatosensory: -                                                                                  |                                           |           |
|                                                                                                                                                               | Vestibular: Upper body & head turns                                                               |                                           |           |
| Cognitive add-on                                                                                                                                              | Double-task: Pairs of two, trailing partner gives commands for stops or turns for leading partner |                                           |           |
|                                                                                                                                                               | Double-task: Pairs of two, trailing partner has to move synchronously with leading partner        |                                           |           |
| <b>Stepping</b>                                                                                                                                               |                                                                                                   |                                           | <b>DB</b> |
| <i>Participants perform various forms of steps.</i>                                                                                                           |                                                                                                   |                                           |           |
| Progression: DOM                                                                                                                                              | Progression: Movement                                                                             | Progression: Tools                        |           |
| Forwards, backwards, sideways                                                                                                                                 | High knees                                                                                        | Stepping out of hoop                      |           |
| Combination of directions                                                                                                                                     | Lunges                                                                                            |                                           |           |
|                                                                                                                                                               | Floor "touches"                                                                                   |                                           |           |
| Sensory modification                                                                                                                                          | Visual: closed eyes                                                                               |                                           |           |
|                                                                                                                                                               | Somatosensory: Various unstable support surfaces                                                  |                                           |           |
|                                                                                                                                                               | Vestibular: Head turns (horizontal, vertical, diagonal)                                           |                                           |           |
| Cognitive add-on                                                                                                                                              | Memory: Each direction gets a number (e.g. front = 1)                                             |                                           |           |
| <b>"Transport chain"</b>                                                                                                                                      |                                                                                                   |                                           | <b>DB</b> |
| <i>Over 5-10m each participant follows a line, but after each collective step an object is "transported" (e.g. thrown).</i>                                   |                                                                                                   |                                           |           |
| Progression: BOS, DOM                                                                                                                                         | Progression: Movement                                                                             | Progression: Tools                        |           |
| Narrow gait                                                                                                                                                   | High knees                                                                                        | Number of tools to be thrown              |           |
| Tandem gait                                                                                                                                                   | Lunges                                                                                            | Kind of objects (small sacks, balls, ...) |           |
| forwards, backwards                                                                                                                                           |                                                                                                   |                                           |           |
| Sensory modification                                                                                                                                          | Visual: -                                                                                         |                                           |           |
|                                                                                                                                                               | Somatosensory: -                                                                                  |                                           |           |
|                                                                                                                                                               | Vestibular: Upper body & head turns (horizontal)                                                  |                                           |           |
| Cognitive add-on                                                                                                                                              | -                                                                                                 |                                           |           |
| <b>"Commander"</b>                                                                                                                                            |                                                                                                   |                                           | <b>DB</b> |
| <i>Pairs of two: one participant has to react to the commands of the other. Commands are different combinations of a step and simultaneous catch.</i>         |                                                                                                   |                                           |           |
| Progression: Movement                                                                                                                                         | Progression: Starting position                                                                    | Progression: Number of commands           |           |
| Tasks for one side of body                                                                                                                                    | On the floor                                                                                      | 2 to 8                                    |           |
| Tasks for both sides of body (e.g. step left, catch right)                                                                                                    | On the floor but inside a hoop                                                                    |                                           |           |
|                                                                                                                                                               | On unstable support surface                                                                       |                                           |           |
|                                                                                                                                                               | 180° turn before step and catch                                                                   |                                           |           |
| Sensory modification                                                                                                                                          | Visual: closed eyes (starting position)                                                           |                                           |           |
|                                                                                                                                                               | Somatosensory: Various unstable support surfaces (starting position)                              |                                           |           |
|                                                                                                                                                               | Vestibular: 180° turns before catch                                                               |                                           |           |
| Cognitive add-on (main focus)                                                                                                                                 | Memory: Recall pairs (movement+number / movement+color word / movement+number or color word)      |                                           |           |
|                                                                                                                                                               | Inhibition: command = stay in place                                                               |                                           |           |
|                                                                                                                                                               | Reaction: commander minimizes time to react                                                       |                                           |           |

| <b>"Movement memory"</b>                                                                                                  |                                                                                                                            | DB |
|---------------------------------------------------------------------------------------------------------------------------|----------------------------------------------------------------------------------------------------------------------------|----|
| <i>Participants move through the gym while performing gait variations coded with various commands given by therapist.</i> |                                                                                                                            |    |
| Progression: Movement                                                                                                     | Progression: Number of pairs                                                                                               |    |
| Tasks for one side of body                                                                                                | 4 to 8                                                                                                                     |    |
| Tasks for both sides of body (e.g. left knee up & right hand to left shoulder)                                            |                                                                                                                            |    |
| Similarity of movements                                                                                                   |                                                                                                                            |    |
| Sensory modification                                                                                                      | Visual: -<br>Somatosensory: -<br>Vestibular: -                                                                             |    |
| Cognitive add-on (main focus)                                                                                             | Memory: Recall pairs (movement+number / movement+color word / movement+number or color word)<br>Inhibition: command = stop |    |

| <b>"Remote control"</b>                                                                                          |                                                                         | DB |
|------------------------------------------------------------------------------------------------------------------|-------------------------------------------------------------------------|----|
| <i>Pairs of two: a participant is steered through the room with closed eyes via tactile cues of the partner.</i> |                                                                         |    |
| Progression: number of cues                                                                                      | Progression: movement                                                   |    |
| 3 to 6                                                                                                           | Tandem walk, high knees                                                 |    |
| Sensory modification                                                                                             | Visual: closed eyes<br>Somatosensory: -<br>Vestibular: turning in place |    |
| Cognitive add-on                                                                                                 | Spatial orientation: report location in space to partner (closed eyes)  |    |

| <b>Walking with tasks</b>                                                                                                                                    |                                                                      | AG                                        |
|--------------------------------------------------------------------------------------------------------------------------------------------------------------|----------------------------------------------------------------------|-------------------------------------------|
| <i>Each participant performs various tasks (e.g. touch opposite knee while throwing an object left to right) while walking back and forth on a 20m lane.</i> |                                                                      |                                           |
| Progression: DOM, speed                                                                                                                                      | Progression: movement                                                | Progression: tools                        |
| Forwards, backwards, sideways                                                                                                                                | Tasks for one side of body                                           | Kind of objects (small sacks, balls, ...) |
| walking, jogging                                                                                                                                             | Tasks for both sides of body (e.g. left knee, right hand)            |                                           |
| Sensory modification                                                                                                                                         | Visual: -<br>Somatosensory: -<br>Vestibular: Head turns (horizontal) |                                           |
| Cognitive add-on                                                                                                                                             | -                                                                    |                                           |

| <b>Agility ladder</b>                                                                                                               |                                                                                                                                                      | AG                                        |
|-------------------------------------------------------------------------------------------------------------------------------------|------------------------------------------------------------------------------------------------------------------------------------------------------|-------------------------------------------|
| <i>Participants perform exercises in an agility ladder on the floor. Number and type of foot contacts in each field are varied.</i> |                                                                                                                                                      |                                           |
| Progression: DOM, speed                                                                                                             | Progression: complexity                                                                                                                              | Progression: tools                        |
| Forwards, backwards, sideways                                                                                                       | Easier sequences (2 / 3 touches)                                                                                                                     | Kind of objects (small sacks, balls, ...) |
|                                                                                                                                     | Harder sequences (1,2,3,2,1 / 2 forwards 1 back / 2 in 1 out)                                                                                        |                                           |
| Sensory modification                                                                                                                | Visual: -<br>Somatosensory: -<br>Vestibular: Head turns                                                                                              |                                           |
| Cognitive add-on                                                                                                                    | Divided attention: Participants have to call numbers shown by therapist<br>Divided attention: Participants have to catch objects thrown by therapist |                                           |

| <b>Cone tipping</b>                                                                                                                                   |                                                                                   | AG |
|-------------------------------------------------------------------------------------------------------------------------------------------------------|-----------------------------------------------------------------------------------|----|
| <i>Pairs of two: one participant starts surrounded by an assemble of cones. The partner outside of the cones says which cones have to be touched.</i> |                                                                                   |    |
| Progression: speed, duration                                                                                                                          | Progression: number of cones                                                      |    |
| Walking, jogging                                                                                                                                      | 4 to 8                                                                            |    |
| 1 round = 30s                                                                                                                                         |                                                                                   |    |
| Sensory modification                                                                                                                                  | Visual: -<br>Somatosensory: -<br>Vestibular: -                                    |    |
| Cognitive add-on                                                                                                                                      | Spatial orientation & memory: directions are given by numbers, colors or alphabet |    |

| <b>Slalom</b>                                       |                                                | AG                                               |
|-----------------------------------------------------|------------------------------------------------|--------------------------------------------------|
| <i>Participants move through a slalom parcours.</i> |                                                |                                                  |
| Progression: speed, duration                        | Progression: number of obstacles               | Progression: competition                         |
| Walking, jogging                                    | 4 to 8                                         | Hit a target with an object at the end of slalom |
| 1 round = 60-90s                                    |                                                |                                                  |
| Sensory modification                                | Visual: -<br>Somatosensory: -<br>Vestibular: - |                                                  |
| Cognitive add-on                                    | -                                              |                                                  |

| <b>Soccer</b>                             |                                                                                            | AG                                  |
|-------------------------------------------|--------------------------------------------------------------------------------------------|-------------------------------------|
| <i>Participants move and pass a ball.</i> |                                                                                            |                                     |
| Progression: speed, duration              | Progression: number of players                                                             | Progression: change of direction    |
| Walking, jogging                          | 1 to 4                                                                                     | Front - back                        |
| 1 round = 60-90s                          |                                                                                            | Front - back and sideways<br>Random |
| Sensory modification                      | Visual: -<br>Somatosensory: -<br>Vestibular: -                                             |                                     |
| Cognitive add-on                          | Attention: participants have to react to stop and change of direction signals by therapist |                                     |

| <b>"Suicide runs"</b>                                                                                                                     |                                                                            |                                        | <b>AG</b> |
|-------------------------------------------------------------------------------------------------------------------------------------------|----------------------------------------------------------------------------|----------------------------------------|-----------|
| <i>The length of the gym is split into 3 sections. Participants cover each section in different speeds, accelerating and decelerating</i> |                                                                            |                                        |           |
| Progression: speed, duration                                                                                                              | Progression: Stops at end of section                                       | Progression: competition               |           |
| Walking, jogging<br>1 round = 45-90s                                                                                                      | touch a cone<br>circle a cone<br>stop - 2 steps back - accelerate forwards | Hit a target with an object at the end |           |
| Sensory modification                                                                                                                      | Visual: -<br>Somatosensory: -<br>Vestibular: -                             |                                        |           |
| Cognitive add-on                                                                                                                          | -                                                                          |                                        |           |

## 2. Water-based MAT

| <b>Standing balance</b>                                                   |                                                                                                              |                    | <b>SB</b> |
|---------------------------------------------------------------------------|--------------------------------------------------------------------------------------------------------------|--------------------|-----------|
| <i>Participants perform various exercises while standing in the pool.</i> |                                                                                                              |                    |           |
| Progression: BOS                                                          | Progression: free leg                                                                                        | Progression: hands |           |
| Narrow BOS                                                                | Floor "touches"                                                                                              | Inside water       |           |
| Semi-tandem stance                                                        | Leg swings                                                                                                   | Outside water      |           |
| Tandem stance                                                             | Number, amplitude, direction of swings                                                                       |                    |           |
| One leg stance (+movements of free leg)                                   |                                                                                                              |                    |           |
| Sensory modification                                                      | Visual: closed eyes<br>Somatosensory: standing on kickboard<br>Vestibular: head turns (horizontal, vertical) |                    |           |
| Cognitive add-on                                                          | -                                                                                                            |                    |           |

| <b>Gait and jump variations</b>                                 |                                                                                                                                        |                    | <b>DB</b> |
|-----------------------------------------------------------------|----------------------------------------------------------------------------------------------------------------------------------------|--------------------|-----------|
| <i>Participants perform gait and jump variations in a lane.</i> |                                                                                                                                        |                    |           |
| Progression: BOS, DOM                                           | Progression: movement                                                                                                                  | Progression: hands |           |
| Narrow gait                                                     | High knees                                                                                                                             | Inside water       |           |
| Tandem gait                                                     | Lunges                                                                                                                                 | Outside water      |           |
| Forwards, backwards, sideways                                   | Hot steps, skipping gait<br>Single-leg, two-legged jumps, hold landing position 3s<br>jumping jack                                     |                    |           |
| Sensory modification                                            | Visual: closed eyes<br>Somatosensory: walking with feet on 1-2 kickboard(s)<br>Vestibular: head turns (horizontal, vertical, diagonal) |                    |           |
| Cognitive add-on                                                | Memory: 4 variations of jumping jack                                                                                                   |                    |           |

| <b>"Movement memory"</b>                                                                                                    |                                                                                                                            |  | <b>DB</b> |
|-----------------------------------------------------------------------------------------------------------------------------|----------------------------------------------------------------------------------------------------------------------------|--|-----------|
| <i>Participants move through the water while performing gait variations coded with various commands given by therapist.</i> |                                                                                                                            |  |           |
| Progression: movement                                                                                                       | Progression: number of pairs                                                                                               |  |           |
| Only legs/only arms                                                                                                         | 4 to 8                                                                                                                     |  |           |
| Combination of arms + legs, one-side of body                                                                                |                                                                                                                            |  |           |
| Combination of arms + legs, both sides of body                                                                              |                                                                                                                            |  |           |
| Similarity of movements                                                                                                     |                                                                                                                            |  |           |
| Sensory modification                                                                                                        | Visual: -<br>Somatosensory: -<br>Vestibular: -                                                                             |  |           |
| Cognitive add-on (main focus)                                                                                               | Memory: recall pairs (movement+number / movement+color word / movement+number or color word)<br>Inhibition: command = stop |  |           |

| <b>"Commander"</b>                                                                                                                                    |                                                                                                                                                          |                                 | <b>DB</b> |
|-------------------------------------------------------------------------------------------------------------------------------------------------------|----------------------------------------------------------------------------------------------------------------------------------------------------------|---------------------------------|-----------|
| <i>Pairs of two. One participant must respond to the commands of the partner. The commands consist of different combinations of a catch and step.</i> |                                                                                                                                                          |                                 |           |
| Progression: movement                                                                                                                                 | Progression: starting position                                                                                                                           | Progression: number of commands |           |
| Catch/step = same side of body                                                                                                                        | Floor                                                                                                                                                    | 2 to 8                          |           |
| Catch/step = diagonal                                                                                                                                 | standing on kickboard<br>180° turns before catching                                                                                                      |                                 |           |
| Sensory modifications                                                                                                                                 | Visual: starting position with closed eyes<br>Somatosensory: kickboard (starting position)<br>Vestibular: 180° turns (starting position)                 |                                 |           |
| Cognitive add-on (main focus)                                                                                                                         | Memory: recall pairs (movement + number / movement + color / movement + number or color)<br>Inhibition: command = stop<br>Reaction: reduce response time |                                 |           |

| <b>"Circuit Training"</b>                                                                                 |                                                |  | <b>DB</b> |
|-----------------------------------------------------------------------------------------------------------|------------------------------------------------|--|-----------|
| <i>Participants complete a circuit as pairs, consisting of various functional leg strength exercises.</i> |                                                |  |           |
| Progression: duration, speed                                                                              |                                                |  |           |
| 45-60s per exercise, 2-3 rounds, 3-4 exercises per round                                                  |                                                |  |           |
| Exercises include: running, swimming, jumping, step-ups                                                   |                                                |  |           |
| Sensory modifications                                                                                     | Visual: -<br>Somatosensory: -<br>Vestibular: - |  |           |
| Cognitive add-on                                                                                          | -                                              |  |           |

| <b>"Chaosball"</b>                                                                                                                                                   |                                                                                                                                                                                             | SB/AG |
|----------------------------------------------------------------------------------------------------------------------------------------------------------------------|---------------------------------------------------------------------------------------------------------------------------------------------------------------------------------------------|-------|
| <i>Participants stand in a circle and throw a ball to each other in a certain order. Various attributes of other participants must be remembered in the process.</i> |                                                                                                                                                                                             |       |
| Progression: number of orders / objects                                                                                                                              |                                                                                                                                                                                             |       |
| 1 order (= 1 object)                                                                                                                                                 |                                                                                                                                                                                             |       |
| Change: 2 orders (= 2 objects)                                                                                                                                       |                                                                                                                                                                                             |       |
| Simultaneously: 2 orders (= 2 objects)                                                                                                                               |                                                                                                                                                                                             |       |
| Simultaneously: 3 orders (= 3 objects)                                                                                                                               |                                                                                                                                                                                             |       |
| Sensory modifications                                                                                                                                                | Visual: -<br>Somatosensory: -<br>Vestibular: -                                                                                                                                              |       |
| Cognitive add-on (main focus)                                                                                                                                        | Memory: recall orders<br>Divided attention: more than one object<br>Spatial orientation: comply with order, while participants no longer stand in a circle, but walk/run around in the pool |       |

| <b>"Waiter"</b>                                                                                   |                                                                                                                                                                                                                                                                                                                                                           | AG |
|---------------------------------------------------------------------------------------------------|-----------------------------------------------------------------------------------------------------------------------------------------------------------------------------------------------------------------------------------------------------------------------------------------------------------------------------------------------------------|----|
| <i>Participants balance a ball on a kickboard and simultaneously perform different exercises.</i> |                                                                                                                                                                                                                                                                                                                                                           |    |
| Progression: DOM, speed                                                                           | Progression: movement                                                                                                                                                                                                                                                                                                                                     |    |
| Walk, jog                                                                                         | Balance ball, throw & catch ball                                                                                                                                                                                                                                                                                                                          |    |
| Forwards, backwards, turns                                                                        | Change hands on kickboard<br>Throw & catch ball while changing hands                                                                                                                                                                                                                                                                                      |    |
| Sensory modification                                                                              | Visual: Move eyes away from ball<br>Somatosensory: -<br>Vestibular: throw & catch with 180°/360° turns                                                                                                                                                                                                                                                    |    |
| Cognitive add-on (main focus)                                                                     | Dual-task: walk/jog & balance ball & react to commands from therapist<br>Divided attention: balance ball while commands given by therapist include hand signs<br>Memory: commands from therapist are given via numbers or via a mix of numbers, hand signs, and/or clapping<br>Processing speed: react as fast as possible to commands given by therapist |    |

| <b>"Compass"</b>                                               |                                                                                                                                                                     | AG |
|----------------------------------------------------------------|---------------------------------------------------------------------------------------------------------------------------------------------------------------------|----|
| <i>Participants move in the directions given by therapist.</i> |                                                                                                                                                                     |    |
| Progression: speed, duration                                   | Progression: number of directions                                                                                                                                   |    |
| Walking, jogging                                               | 4 to 8 (front, back, side, diagonal)                                                                                                                                |    |
| 1 round = 45-60s                                               |                                                                                                                                                                     |    |
| Sensory modification                                           | Visual: -<br>Somatosensory: -<br>Vestibular: -                                                                                                                      |    |
| Cognitive add-on                                               | Memory: recall pairs (direction+number / direction+color word)<br>Inhibition: therapist gives false cues<br>Processing speed: react as fast as possible to commands |    |

| <b>"Mirror"</b>                                                                                       |                                                           | AG |
|-------------------------------------------------------------------------------------------------------|-----------------------------------------------------------|----|
| <i>Pairs of two. One participant leads, the other follows while always keeping the same distance.</i> |                                                           |    |
| Progression: speed, duration                                                                          | Progression: fakes                                        |    |
| Walking, jogging, competition (shake off)                                                             | Leader fakes change of direction<br>Leader changes speeds |    |
| 45-60sec.                                                                                             |                                                           |    |
| Sensory modification                                                                                  | Visual: -<br>Somatosensory: -<br>Vestibular: -            |    |
| Cognitive add-on                                                                                      | -                                                         |    |

| <b>"Beachball"</b>                         |                                                                    | AG |
|--------------------------------------------|--------------------------------------------------------------------|----|
| <i>Participants play with a beachball.</i> |                                                                    |    |
| Progression: number of players             |                                                                    |    |
| 2 to whole group                           |                                                                    |    |
| Sensory modification                       | Visual: -<br>Somatosensory: standing on kickboard<br>Vestibular: - |    |
| Cognitive add-on                           | -                                                                  |    |

MAT = multimodal agility-based exercise training; BOS = Base of support; DOM = Direction of movement

### Components

- SB = Standing balance
- DB = Dynamic balance & functional leg strength
- AG = Agility

Each bracket represents a module. Each module targets one of the three components.

1. Callesen J, Cattaneo D, Brincks J, et al. How do resistance training and balance and motor control training affect gait performance and fatigue impact in people with multiple sclerosis? A randomized controlled multi-center study. *Mult Scler* 2020;26(11):1420-32. doi: 10.1177/1352458519865740 [published Online First: 20190724]
